# Supplementary material for: Thermal decomposition mechanism and kinetics of perfluorooctanoic acid (PFOA) and other perfluorinated carboxylic acids: a theoretical study
Source: Royal Society of Chemistry journal article supplement (doi:10.1039/d2em00259k), 2022-01-01
Supplement: d2em00259k1.pdf [file d2em00259k1.pdf]

## Supplementary Information

# Thermal Decomposition Mechanism and Kinetics of Perfluorooctanoic Acid (PFOA) and Other Perfluorinated Carboxylic Acids: A Theoretical Study

M. Yasir Khan, Jiaou Song, Milad Narimani, Gabriel da Silva \*

Department of Chemical Engineering, University of Melbourne, Victoria 3010, Australia.

\*Corresponding author. Email: gdasilva@unimelb.edu.au

## List of Figures

- S1 Potential energy diagram for thermal decomposition mechanism of PFOA. Energies are 0 K enthalpies in kcal/mol calculated at the DSD-PBEB95/def2-TZVPP, (M062X/6-31G(2df,p)), [PBE0/def2-TZVPP], and {BMK/6-31++G(2df,p)} levels of theory. . . . . 1
- S2 Potential energy diagram for thermal decomposition mechanism for 2,3,3,4,4,5,5,6,6,7,7,7-Dodecafluoro-2-(trifluoromethyl) heptanoic acid (iso-PFOA). Energies are 0 K enthalpies in kcal/mol calculated at the DSD-PBEB95/def2-TZVPP and (M062X/6-31G(2df,p)) levels of theory. . . . . 3
- S3 Arrhenius plot of the reaction rate constants,  $k$  ( $s^{-1}$ ), for the thermal decomposition of iso-PFOA (see PES Fig. S2 ). Arrhenius expressions for  $C_8F_{14}O_2 + HF$  (TSO1a), and  $C_4F_9CF=CF_3 + HF + CO_2$  (TSO3a) are  $k = 1.15 \times 10^{13} e^{-\frac{59764}{RT}}$ , and  $k = 1.38 \times 10^{14} e^{-\frac{57874}{RT}}$ , respectively, (units are s, cal, K, mol). . . . . 4
- S4 Branching ratio of the degradation products for the thermal decomposition of iso-PFOA (see PES Fig. S2),  $C_8F_{14}O_2 + HF$  (TSO1a), and  $C_4F_9CF=CF_3 + HF + CO_2$  (TSO3a). 4

|     |                                                                                                                                                                                                                                                                                                                                                                                                                       |    |
|-----|-----------------------------------------------------------------------------------------------------------------------------------------------------------------------------------------------------------------------------------------------------------------------------------------------------------------------------------------------------------------------------------------------------------------------|----|
| S5  | Arrhenius plot of the reaction rate constants, $k$ ( $s^{-1}$ ), for the thermal decomposition of Perfluoro-3-Hexyl- $\alpha$ -lactone (PES Fig. 6a (article)). Arrhenius expressions for $C_6F_{13}CFO + CO$ (TS1O1), and $C_6F_{13}CF + CO_2$ (TS1O2) are $k = 3.95 \times 10^{13} e^{-\frac{16610}{RT}}$ , and $k = 5.91 \times 10^{14} e^{-\frac{33528}{RT}}$ , respectively, (units are s, cal, K, mol). . . . . | 6  |
| S6  | Branching ratio of the degradation products for the thermal decomposition of Perfluoro-3-Hexyl- $\alpha$ -lactone (PES Fig. 6a (article) ), $C_6F_{13}CFO + CO$ (TS1O1), and $C_6F_{13}CF + CO_2$ (TS1O2). . . . .                                                                                                                                                                                                    | 7  |
| S7  | Potential energy diagram for thermal decomposition mechanism of (a) Perfluoroheptanoic acid, (b) Perfluoro-3-Pentyl- $\alpha$ -lactone, (c) hydrolysis of perfluoro-hexane aldehyde to Perfluorohexanoic acid, Energies are (0 K enthalpies, kcal/mol) calculated at the DSD-PBEB95/def2-TZVPP, (M062X/6-31G(2df,p)), [PBE0/def2-TZVPP] levels of theory. . . . .                                                     | 8  |
| S8  | Potential energy diagram for thermal decomposition mechanism of (a) Perfluorohexanoic acid, (b) Perfluoro-3-Butyl- $\alpha$ -lactone, (c) hydrolysis of perfluoro-pentane aldehyde to Perfluoropentanoic acid, Energies are (0 K enthalpies, kcal/mol) calculated at the DSD-PBEB95/def2-TZVPP, (M062X/6-31G(2df,p)), [PBE0/def2-TZVPP] levels of theory. . . . .                                                     | 10 |
| S9  | Potential energy diagram for thermal decomposition mechanism of (a) Perfluoropentanoic acid, (b) Perfluoro-3-Propyl- $\alpha$ -lactone, (c) hydrolysis of perfluoro-butane aldehyde to Perfluorobutanoic acid, Energies are (0 K enthalpies, kcal/mol) calculated at the DSD-PBEB95/def2-TZVPP, (M062X/6-31G(2df,p)), [PBE0/def2-TZVPP] levels of theory. . . . .                                                     | 12 |
| S10 | Potential energy diagram for thermal decomposition mechanism of (a) Perfluorobutanoic acid, (b) Perfluoro-3-Ethyl- $\alpha$ -lactone, (c) hydrolysis of perfluoro-propane aldehyde to Pentafluoropropionic acid, Energies are (0 K enthalpies, kcal/mol) calculated at the DSD-PBEB95/def2-TZVPP, (M062X/6-31G(2df,p)), [PBE0/def2-TZVPP] levels of theory. . . . .                                                   | 14 |
| S11 | Potential energy diagram for thermal decomposition mechanism for Pentafluoropropionic acid. Energies are 0 K enthalpies in kcal/mol calculated at the DSD-PBEB95/def2-TZVPP, (M062X/6-31G(2df,p)), [PBE0 /def2-TZVPP] levels of theory. . . . .                                                                                                                                                                       | 16 |
| S12 | Potential energy diagram for thermal decomposition mechanism for (a) Perfluoro-3-Methyl- $\alpha$ -lactone, (b) hydrolysis of perfluoroacetyl fluoride to trifluoroacetic acid (TFA), Energies are (0 K enthalpies, kcal/mol) calculated at the DSD-PBEB95/def2-TZVPP, (M062X/6-31G(2df,p)), [PBE0/def2-TZVPP] levels of theory. . . . .                                                                              | 16 |

|     |                                                                                                                                                                                                                                                                                                                                                                                                                                                                                                                                                                  |    |
|-----|------------------------------------------------------------------------------------------------------------------------------------------------------------------------------------------------------------------------------------------------------------------------------------------------------------------------------------------------------------------------------------------------------------------------------------------------------------------------------------------------------------------------------------------------------------------|----|
| S13 | Optimized transition states and ground state structures reported in Figure S11 and Figure S12, Transition states (a-f) Perfluoro-Methyl- $\alpha$ -lactone (g), Perfluoroacetyl fluoride (h), TFA (i) at the M06-2X/6-31G(2df,p) level of theory . . . . .                                                                                                                                                                                                                                                                                                       | 17 |
| S14 | Arrhenius plot of the reaction rate coefficients, $k$ ( $s^{-1}$ ), for the thermal decomposition of Pentafluoropropionic acid (see PES Fig. S11 ). Arrhenius expressions for $CF_3CFO + CO + HF$ (TS1E), $+ CF_3CF_2H + CO_2$ (TS2E), $CF_3CF + FCOOH$ (TS3E), and $CF_2CF_2 + HF + CO_2$ (TS4E) are $k = 8.10 \times 10^{12} e^{-\frac{54706}{RT}}$ , $k = 2.40 \times 10^{14} e^{-\frac{73180}{RT}}$ , $k = 3.75 \times 10^{13} e^{-\frac{88780}{RT}}$ , and $k = 2.90 \times 10^{14} e^{-\frac{69763}{RT}}$ respectively (units are s, cal, K, mol). . . . . | 18 |
| S15 | Branching ratio of the degradation products for the thermal decomposition of Pentafluoropropionic acid (see PES Fig. 4 in the article), $CF_3CFO + CO + HF$ (TS1E), $+ CF_3CF_2H + CO_2$ (TS2E), $CF_3CF + FCOOH$ (TS3E), and $CF_2CF_2 + HF + CO_2$ (TS4E). . . . .                                                                                                                                                                                                                                                                                             | 18 |
| S16 | Potential energy diagram for thermal decomposition mechanism for Perfluorononanoic acid (PFNA). Energies are 0 K enthalpies in kcal/mol calculated at the (M062X/6-31G(2df,p)), [PBE0/def2-TZVPP] levels of theory. . . . .                                                                                                                                                                                                                                                                                                                                      | 20 |
| S17 | Formation of different radicals resulting from direct bonds dissociation of trifluoroacetic acid (TFA). . . . .                                                                                                                                                                                                                                                                                                                                                                                                                                                  | 22 |
| S18 | Optimized (M06-2X/6-31G(2df,p)) ground state structures of the key species involve in the radical network of TFA dissociation S17 . . . . .                                                                                                                                                                                                                                                                                                                                                                                                                      | 23 |
| S19 | Comparison of the absolute percentage error (%) between DSD-PBEB95/def2-TZVPP and PBE0/def2-TZVPP for the transition states of TFA (Table S20). The percentage errors are calculated with reference to G3X-K method. . . . .                                                                                                                                                                                                                                                                                                                                     | 24 |

## List of Tables

|    |                                                                                                                                    |   |
|----|------------------------------------------------------------------------------------------------------------------------------------|---|
| S1 | Arrhenius expressions for the decomposition channels of PFOA presented in Fig. 1 (article), units are: s, cal, K, and mol. . . . . | 1 |
| S2 | Half lives of PFOA based on TSO1, TSO2, and TSO3, assuming a first order decomposition reaction. . . . .                           | 2 |
| S3 | Arrhenius expressions for the decomposition channels of iso-PFOA presented in Fig. S2, units are: s, cal, K, and mol. . . . .      | 3 |

|     |                                                                                                                                                                            |    |
|-----|----------------------------------------------------------------------------------------------------------------------------------------------------------------------------|----|
| S4  | Half lives of iso-PFOA based on the transition state TSO1a and TSO3a (assuming a first order decomposition reaction) . . . . .                                             | 5  |
| S5  | Arrhenius expressions for the decomposition channels presented in Fig. 6 (article), units are: s, cal, K, and mol. . . . .                                                 | 6  |
| S6  | Half lives of Perfluoro-3-Hexyl- $\alpha$ -lactone based on the transition state TS1O1 and TS1O2                                                                           | 7  |
| S7  | Arrhenius expressions for the decomposition channels presented in Fig. S7, units are: s, cal, K, and mol. . . . .                                                          | 8  |
| S8  | Half lives of Perfluoroheptanoic acid (TS71) and Perfluoro-3-Pentyl- $\alpha$ -lactone (TS171, and TS172) by assuming a first order decomposition reaction. . . . .        | 9  |
| S9  | Arrhenius expressions for the decomposition channels presented in Fig. S8, units are: s, cal, K, and mol. . . . .                                                          | 10 |
| S10 | Half lives of Perfluorohexanoic acid (TS61) and Perfluoro-3-Butyl- $\alpha$ -lactone (TS161, and TS162) by assuming a first order decomposition reaction. . . . .          | 11 |
| S11 | Arrhenius expressions for the decomposition channels presented in Fig. S9, units are: s, cal, K, and mol. . . . .                                                          | 12 |
| S12 | Half lives of Perfluoropentanoic acid (TS51) and Perfluoro-3-Propyl- $\alpha$ -lactone (TS151, and TS152) by assuming a first order decomposition reaction. . . . .        | 13 |
| S13 | Arrhenius expressions for the decomposition channels presented in Fig. S10, units are: s, cal, K, and mol. . . . .                                                         | 14 |
| S14 | Half lives of Perfluorobutanoic acid (TS41) and Perfluoro-3-Ethyl- $\alpha$ -lactone (TS141, and TS142) by assuming a first order decomposition reaction. . . . .          | 15 |
| S15 | Arrhenius expressions for the decomposition channels presented in Fig. S11, and Fig. S12, units are: s, cal, K, and mol. . . . .                                           | 19 |
| S16 | Half lives of Pentafluoropropionic acid (TS1E) and Perfluoro-Methyl- $\alpha$ -lactone (TS1E1, and TS1E2) by assuming a first order decomposition reaction. . . . .        | 19 |
| S17 | Arrhenius expressions for the decomposition of Perfluorononanoic acid presented in Fig. S16, units are: s, cal, K, and mol. . . . .                                        | 20 |
| S18 | Half lives of Perfluorononanoic acid based on the transition state TSN1, TSN3, and TSN4 (assuming a first order decomposition reaction) . . . . .                          | 21 |
| S19 | Energies are 0 K enthalpies in kcal/mol for the different bond dissociation energies of TFA, calculated at different levels of theory with zero-point corrections. . . . . | 22 |

|     |                                                                                                                                                                                                                                                    |    |
|-----|----------------------------------------------------------------------------------------------------------------------------------------------------------------------------------------------------------------------------------------------------|----|
| S20 | Energies are 0 K enthalpies in kcal/mol for TFA transition states, calculated at different levels of theory with zero-point corrections. . . . .                                                                                                   | 23 |
| S21 | Arrhenius expressions for the decomposition channels presented in Fig. 8 (article), and Fig. 12 (article), units are: s, cal, K, and mol. . . . .                                                                                                  | 24 |
| S22 | Half lives of TFA (TS1M, TS2M), difluoroacetolactone (TS1M1, and TS1M2), and perfluoroformic acid (TS1M4) by assuming a first order decomposition reaction. . . . .                                                                                | 25 |
| S23 | Moments of inertia ( $\text{amu } \text{Å}^2$ ) of PFOA and transition states presented in Fig. 3 (article) at M06-2X/6-31G(2df,p) level of theory. . . . .                                                                                        | 26 |
| S24 | Moments of inertia ( $\text{amu } \text{Å}^2$ ) of Perfluoro-3-Hexyl- $\alpha$ -lactone, C7-perfluorinated aldehyde, water, and transition states presented in Fig. 6 (article) at M06-2X/6-31G(2df,p) level of theory. . . . .                    | 26 |
| S25 | Moments of inertia ( $\text{amu } \text{Å}^2$ ) of iso-PFOA and transition states presented in Fig. S2 at M06-2X/6-31G(2df,p) level of theory. . . . .                                                                                             | 26 |
| S26 | Moments of inertia ( $\text{amu } \text{Å}^2$ ) of Perfluoroheptanoic acid, Perfluoro-3-Pentyl- $\alpha$ -lactone, C6-perfluorinated aldehyde, and transition states presented in Fig. S7 at M06-2X/6-31G(2df,p) level of theory. . . . .          | 27 |
| S27 | Moments of inertia ( $\text{amu } \text{Å}^2$ ) of Perfluorohexanoic acid, Perfluoro-3-Butyl- $\alpha$ -lactone, C5-perfluorinated aldehyde, and transition states presented in Fig. S8 at M06-2X/6-31G(2df,p) level of theory. . . . .            | 27 |
| S28 | Moments of inertia ( $\text{amu } \text{Å}^2$ ) of Perfluoropentanoic acid, Perfluoro-3-Propyl- $\alpha$ -lactone, C4-perfluorinated aldehyde, and transition states presented in Fig. S9 at M06-2X/6-31G(2df,p) level of theory. . . . .          | 27 |
| S29 | Moments of inertia ( $\text{amu } \text{Å}^2$ ) of Perfluorobutanoic acid, Perfluoro-3-Ethyl- $\alpha$ -lactone, C3-perfluorinated aldehyde, and transition states presented in Fig. S10 at M06-2X/6-31G(2df,p) level of theory. . . . .           | 28 |
| S30 | Moments of inertia ( $\text{amu } \text{Å}^2$ ) of Pentafluoropropionic acid, Perfluoro-3-Methyl- $\alpha$ -lactone, perfluoroacetyl fluoride, and transition states TS1E, TS1E1, TS1E2, and TS1E3 at M06-2X/6-31G(2df,p) level of theory. . . . . | 28 |
| S31 | Moments of inertia ( $\text{amu } \text{Å}^2$ ) of PFNA and transition states presented in Fig. S16 at M06-2X/6-31G(2df,p) level of theory. . . . .                                                                                                | 28 |

|     |                                                                                                                                                                                                                                                                                                                                                              |    |
|-----|--------------------------------------------------------------------------------------------------------------------------------------------------------------------------------------------------------------------------------------------------------------------------------------------------------------------------------------------------------------|----|
| S32 | Moments of inertia ( $\text{amu } \text{\AA}^2$ ) of trifluoroacetic acid (TFA) and transition states presented in Fig. 8 (article) at M06-2X/6-31G(2df,p) level of theory. . . . .                                                                                                                                                                          | 29 |
| S33 | Moments of inertia ( $\text{amu } \text{\AA}^2$ ) of Difluoroacetolactone, carbonyl fluoride, perfluoro-formic acid, and transition states TS1M1, TS1M2, TS1M3, and TS1M4 at M06-2X/6-31G(2df,p) level of theory. . . . .                                                                                                                                    | 29 |
| S34 | Vibrational frequencies ( $\text{cm}^{-1}$ ) of PFOA, and transition state TSO1 and TSO2 at M06-2X/6-31G(2df,p) level of theory . . . . .                                                                                                                                                                                                                    | 30 |
| S35 | Vibrational frequencies ( $\text{cm}^{-1}$ ) of transition states TSO3, TSO4, and TSO5 at M06-2X/6-31G(2df,p) level of theory . . . . .                                                                                                                                                                                                                      | 31 |
| S36 | Vibrational frequencies ( $\text{cm}^{-1}$ ) of Perfluoro-3-Hexyl- $\alpha$ -lactone, and transition states TS1O1, and TS1O2 at M06-2X/6-31G(2df,p) level of theory . . . . .                                                                                                                                                                                | 32 |
| S37 | Vibrational frequencies ( $\text{cm}^{-1}$ ) of C7-perfluorinated aldehyde, and transition states TS1O3, and water at M06-2X/6-31G(2df,p) level of theory . . . . .                                                                                                                                                                                          | 33 |
| S38 | Vibrational frequencies ( $\text{cm}^{-1}$ ) of iso-PFOA, and transition state TSO1a and TSO3a at M06-2X/6-31G(2df,p) level of theory . . . . .                                                                                                                                                                                                              | 34 |
| S39 | Vibrational frequencies ( $\text{cm}^{-1}$ ) of Perfluoroheptanoic acid, Perfluoro-3-Pentyl- $\alpha$ -lactone, and transition state TS71 at M06-2X/6-31G(2df,p) level of theory . . . . .                                                                                                                                                                   | 35 |
| S40 | Vibrational frequencies ( $\text{cm}^{-1}$ ) of C6-perfluorinated aldehyde, and transition states TS171, TS172, and TS173 at M06-2X/6-31G(2df,p) level of theory . . . . .                                                                                                                                                                                   | 36 |
| S41 | Vibrational frequencies ( $\text{cm}^{-1}$ ) of Perfluorohexanoic acid, Perfluoro-3-Butyl- $\alpha$ -lactone, and transition states TS61, and TS161 at M06-2X/6-31G(2df,p) level of theory . . . . .                                                                                                                                                         | 37 |
| S42 | Vibrational frequencies ( $\text{cm}^{-1}$ ) of C5-perfluorinated aldehyde, and transition states TS162, and TS163 at M06-2X/6-31G(2df,p) level of theory . . . . .                                                                                                                                                                                          | 38 |
| S43 | Vibrational frequencies ( $\text{cm}^{-1}$ ) of Perfluoropentanoic acid, Perfluoro-3-Propyl- $\alpha$ -lactone, and transition states TS51, and TS151 at M06-2X/6-31G(2df,p) level of theory . . . . .                                                                                                                                                       | 39 |
| S44 | Vibrational frequencies ( $\text{cm}^{-1}$ ) of C4-perfluorinated aldehyde, and transition states TS152, and TS153 at M06-2X/6-31G(2df,p) level of theory . . . . .                                                                                                                                                                                          | 40 |
| S45 | Vibrational frequencies ( $\text{cm}^{-1}$ ) of Perfluorobutanoic acid ( $\text{C}_3\text{F}_7\text{COOH}$ ), Perfluoro-3-Ethyl- $\alpha$ -lactone ( $\text{C}_3\text{F}_6\text{CO}_2$ ), C3-perfluorinated aldehyde ( $\text{C}_3\text{F}_6\text{O}$ ) and transition states TS41, TS141, TS142, and TS143 at M06-2X/6-31G(2df,p) level of theory . . . . . | 41 |

|     |                                                                                                                                                                                                                                                                                                                                                                |    |
|-----|----------------------------------------------------------------------------------------------------------------------------------------------------------------------------------------------------------------------------------------------------------------------------------------------------------------------------------------------------------------|----|
| S46 | Vibrational frequencies ( $\text{cm}^{-1}$ ) of Pentafluoropropionic acid ( $\text{C}_2\text{F}_5\text{COOH}$ ), Perfluoro-3-Methyl- $\alpha$ -lactone ( $\text{C}_2\text{F}_4\text{CO}_2$ ), perfluoroacetyl fluoride ( $\text{C}_2\text{F}_4\text{O}$ ) and transition states TS1E, TS1E1, TS1E2, and TS1E3 at M06-2X/6-31G(2df,p) level of theory . . . . . | 42 |
| S47 | Vibrational frequencies ( $\text{cm}^{-1}$ ) of Perfluorononanoic acid (PFNA), and transition state TSN1 and TSN2 at M06-2X/6-31G(2df,p) level of theory . . . . .                                                                                                                                                                                             | 43 |
| S48 | Vibrational frequencies ( $\text{cm}^{-1}$ ) of transition states TSN3, TSN4, and TSN5 at M06-2X/6-31G(2df,p) level of theory . . . . .                                                                                                                                                                                                                        | 44 |
| S49 | Vibrational frequencies ( $\text{cm}^{-1}$ ) of trifluoroacetic acid (TFA), and transition states TS1M, TS2M, TS3M, TS4M, and TS5M at M06-2X/6-31G(2df,p) level of theory . . . . .                                                                                                                                                                            | 45 |
| S50 | Vibrational frequencies ( $\text{cm}^{-1}$ ) of Difluoroacetolactone ( $\text{CF}_2\text{CO}_2$ ), carbonyl fluoride ( $\text{CF}_2\text{O}$ ), perfluoro-formic acid (FCOOH), and transition states TS1M1, TS1M2, TS1M3, and TS1M4 at M06-2X/6-31G(2df,p) level of theory . . . . .                                                                           | 46 |
| S51 | Cartesian coordinates ( $\text{\AA}$ ) of PFOA . . . . .                                                                                                                                                                                                                                                                                                       | 47 |
| S52 | Cartesian coordinates ( $\text{\AA}$ ) of TSO1 . . . . .                                                                                                                                                                                                                                                                                                       | 48 |
| S53 | Cartesian coordinates ( $\text{\AA}$ ) of TSO2 . . . . .                                                                                                                                                                                                                                                                                                       | 49 |
| S54 | Cartesian coordinates ( $\text{\AA}$ ) of TSO3 . . . . .                                                                                                                                                                                                                                                                                                       | 50 |
| S55 | Cartesian coordinates ( $\text{\AA}$ ) of TSO4 . . . . .                                                                                                                                                                                                                                                                                                       | 51 |
| S56 | Cartesian coordinates ( $\text{\AA}$ ) of TSO5 . . . . .                                                                                                                                                                                                                                                                                                       | 52 |
| S57 | Cartesian coordinates ( $\text{\AA}$ ) of Perfluoro-3-Hexyl- $\alpha$ -lactone . . . . .                                                                                                                                                                                                                                                                       | 53 |
| S58 | Cartesian coordinates ( $\text{\AA}$ ) of TS1O1 . . . . .                                                                                                                                                                                                                                                                                                      | 54 |
| S59 | Cartesian coordinates ( $\text{\AA}$ ) of TS1O2 . . . . .                                                                                                                                                                                                                                                                                                      | 55 |
| S60 | Cartesian coordinates ( $\text{\AA}$ ) of C7-perfluorinated aldehyde . . . . .                                                                                                                                                                                                                                                                                 | 56 |
| S61 | Cartesian coordinates ( $\text{\AA}$ ) of TS1O3 . . . . .                                                                                                                                                                                                                                                                                                      | 57 |
| S62 | Cartesian coordinates ( $\text{\AA}$ ) of perfluoroheptanoic acid . . . . .                                                                                                                                                                                                                                                                                    | 58 |
| S63 | Cartesian coordinates ( $\text{\AA}$ ) of iso-PFOA . . . . .                                                                                                                                                                                                                                                                                                   | 59 |
| S64 | Cartesian coordinates ( $\text{\AA}$ ) of TSO1a . . . . .                                                                                                                                                                                                                                                                                                      | 60 |
| S65 | Cartesian coordinates ( $\text{\AA}$ ) of TSO3a . . . . .                                                                                                                                                                                                                                                                                                      | 61 |
| S66 | Cartesian coordinates ( $\text{\AA}$ ) of perfluoroheptanoic acid . . . . .                                                                                                                                                                                                                                                                                    | 62 |
| S67 | Cartesian coordinates ( $\text{\AA}$ ) of TS71 . . . . .                                                                                                                                                                                                                                                                                                       | 63 |
| S68 | Cartesian coordinates ( $\text{\AA}$ ) of Perfluoro-3-Pentyl- $\alpha$ -lactone . . . . .                                                                                                                                                                                                                                                                      | 64 |
| S69 | Cartesian coordinates ( $\text{\AA}$ ) of TS171 . . . . .                                                                                                                                                                                                                                                                                                      | 65 |

|      |                                                                              |    |
|------|------------------------------------------------------------------------------|----|
| S70  | Cartesian coordinates (Å) of TS172 . . . . .                                 | 66 |
| S71  | Cartesian coordinates (Å) of C6-perfluorinated aldehyde . . . . .            | 67 |
| S72  | Cartesian coordinates (Å) of TS173 . . . . .                                 | 68 |
| S73  | Cartesian coordinates (Å) of Perfluorohexanoic acid . . . . .                | 69 |
| S74  | Cartesian coordinates (Å) of TS61 . . . . .                                  | 70 |
| S75  | Cartesian coordinates (Å) of Perfluoro-3-Butyl- $\alpha$ -lactone . . . . .  | 71 |
| S76  | Cartesian coordinates (Å) of TS161 . . . . .                                 | 72 |
| S77  | Cartesian coordinates (Å) of TS162 . . . . .                                 | 73 |
| S78  | Cartesian coordinates (Å) of C5-perfluorinated aldehyde . . . . .            | 74 |
| S79  | Cartesian coordinates (Å) of TS163 . . . . .                                 | 75 |
| S80  | Cartesian coordinates (Å) of Perfluoropentanoic acid . . . . .               | 76 |
| S81  | Cartesian coordinates (Å) of TS51 . . . . .                                  | 77 |
| S82  | Cartesian coordinates (Å) of Perfluoro-3-Propyl- $\alpha$ -lactone . . . . . | 78 |
| S83  | Cartesian coordinates (Å) of TS151 . . . . .                                 | 79 |
| S84  | Cartesian coordinates (Å) of TS152 . . . . .                                 | 80 |
| S85  | Cartesian coordinates (Å) of C4-perfluorinated aldehyde . . . . .            | 80 |
| S86  | Cartesian coordinates (Å) of TS153 . . . . .                                 | 81 |
| S87  | Cartesian coordinates (Å) of Perfluorobutanoic acid . . . . .                | 82 |
| S88  | Cartesian coordinates (Å) of TS41 . . . . .                                  | 83 |
| S89  | Cartesian coordinates (Å) of Perfluoro-3-Ethyl- $\alpha$ -lactone . . . . .  | 83 |
| S90  | Cartesian coordinates (Å) of TS141 . . . . .                                 | 84 |
| S91  | Cartesian coordinates (Å) of TS142 . . . . .                                 | 84 |
| S92  | Cartesian coordinates (Å) of C3-perfluorinated aldehyde . . . . .            | 85 |
| S93  | Cartesian coordinates (Å) of TS143 . . . . .                                 | 85 |
| S94  | Cartesian coordinates (Å) of Pentafluoropropionic acid . . . . .             | 86 |
| S95  | Cartesian coordinates (Å) of TS1E . . . . .                                  | 86 |
| S96  | Cartesian coordinates (Å) of TS2E . . . . .                                  | 87 |
| S97  | Cartesian coordinates (Å) of TS3E . . . . .                                  | 87 |
| S98  | Cartesian coordinates (Å) of TS4E . . . . .                                  | 88 |
| S99  | Cartesian coordinates (Å) of Perfluoro-3-Methyl- $\alpha$ -lactone . . . . . | 88 |
| S100 | Cartesian coordinates (Å) of TS1E1 . . . . .                                 | 89 |



|                                                                        |    |
|------------------------------------------------------------------------|----|
| S101 Cartesian coordinates (Å) of TS1E2 . . . . .                      | 89 |
| S102 Cartesian coordinates (Å) of perfluoroacetyl fluoride . . . . .   | 89 |
| S103 Cartesian coordinates (Å) of TS1E3 . . . . .                      | 90 |
| S104 Cartesian coordinates (Å) of trifluoroacetic acid (TFA) . . . . . | 91 |
| S105 Cartesian coordinates (Å) of TS1M . . . . .                       | 91 |
| S106 Cartesian coordinates (Å) of TS2M . . . . .                       | 92 |
| S107 Cartesian coordinates (Å) of TS3M . . . . .                       | 92 |
| S108 Cartesian coordinates (Å) of TS4M . . . . .                       | 92 |
| S109 Cartesian coordinates (Å) of TS5M . . . . .                       | 93 |
| S110 Cartesian coordinates (Å) of Difluoroacetolactone . . . . .       | 93 |
| S111 Cartesian coordinates (Å) of TS1M1 . . . . .                      | 93 |
| S112 Cartesian coordinates (Å) of TS1M2 . . . . .                      | 94 |
| S113 Cartesian coordinates (Å) of carbonyl fluoride . . . . .          | 94 |
| S114 Cartesian coordinates (Å) of TS1M3 . . . . .                      | 94 |
| S115 Cartesian coordinates (Å) of perfluoro-formic acid . . . . .      | 95 |
| S116 Cartesian coordinates (Å) of TS1M4 . . . . .                      | 95 |

# Decomposition of PFOA

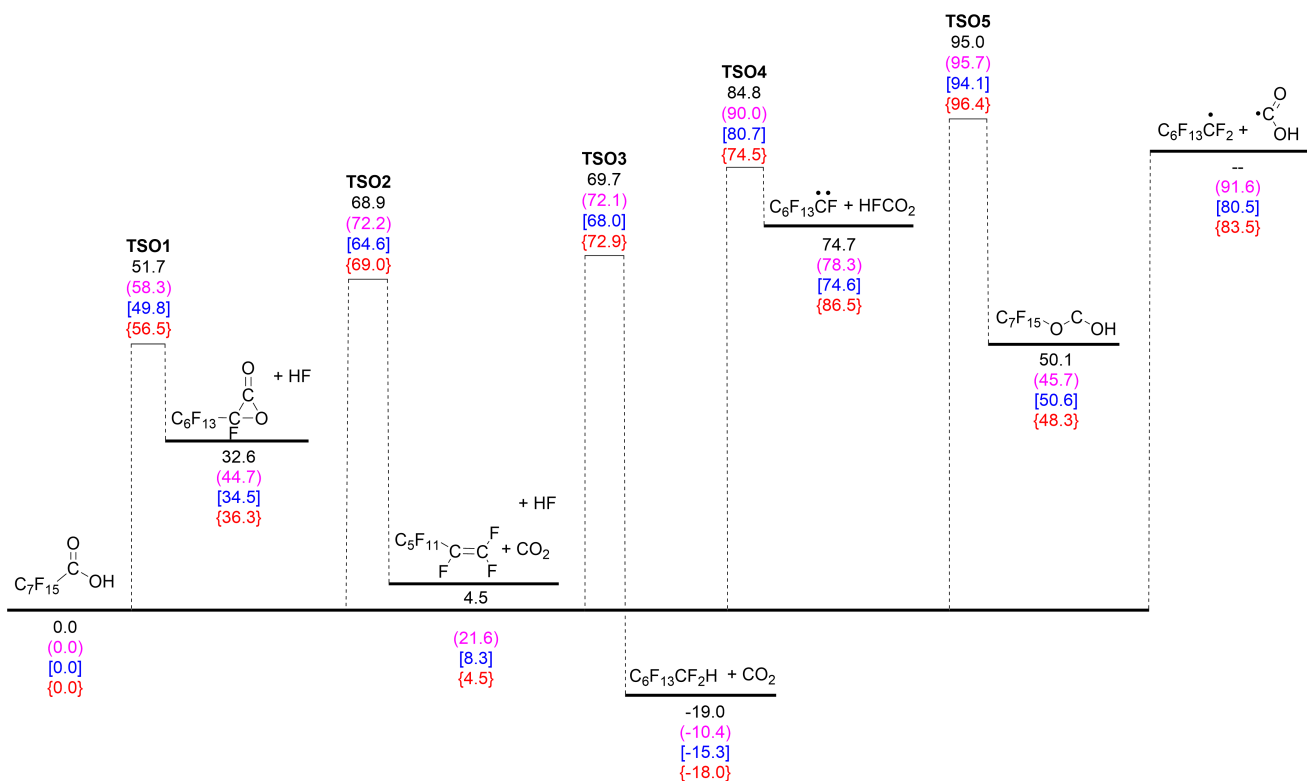

Figure S1: Potential energy diagram for thermal decomposition mechanism of PFOA. Energies are 0 K enthalpies in kcal/mol calculated at the DSD-PBEB95/def2-TZVPP, (M062X/6-31G(2df,p)), [PBE0/def2-TZVPP], and {BMK/6-31++G(2df,p)} levels of theory.

Table S1: Arrhenius expressions for the decomposition channels of PFOA presented in Fig. 1 (article), units are: s, cal, K, and mol.

| Transition states                       | Arrhenius expression ( $s^{-1}$ )               |
|-----------------------------------------|-------------------------------------------------|
| TSO1 ( $C_6F_{13}CFCO_2 + HF$ )         | $k = 2.66 \times 10^{13} e^{-\frac{52605}{RT}}$ |
| TSO2 ( $C_5F_{11}CF=CF_2 + CO_2 + HF$ ) | $k = 1.83 \times 10^{14} e^{-\frac{70023}{RT}}$ |
| TSO3 ( $C_6F_{13}CF_2H + CO_2$ )        | $k = 7.03 \times 10^{14} e^{-\frac{71285}{RT}}$ |
| TSO4 ( $C_6F_{13}CF + HFCO_2$ )         | $k = 9.23 \times 10^{13} e^{-\frac{85966}{RT}}$ |
| TSO5 ( $C_7F_{15}OCOH$ )                | $k = 4.83 \times 10^{13} e^{-\frac{95974}{RT}}$ |

Table S2: Half lives of PFOA based on TSO1, TSO2, and TSO3, assuming a first order decomposition reaction.

| Temperature | TSO1                   | TSO2                   | TSO3                   |
|-------------|------------------------|------------------------|------------------------|
| (K)         | half life (s)          | half life (s)          | half life (s)          |
| 300         | $5.05 \times 10^{+24}$ | $3.33 \times 10^{+36}$ | $6.88 \times 10^{+36}$ |
| 400         | $1.46 \times 10^{+15}$ | $7.01 \times 10^{+23}$ | $8.99 \times 10^{+23}$ |
| 500         | $2.69 \times 10^{+09}$ | $1.67 \times 10^{+16}$ | $1.58 \times 10^{+16}$ |
| 600         | $4.00 \times 10^{+05}$ | $1.35 \times 10^{+11}$ | $1.04 \times 10^{+11}$ |
| 700         | $7.32 \times 10^{+02}$ | $3.06 \times 10^{+07}$ | $2.02 \times 10^{+07}$ |
| 800         | $6.44 \times 10^{+00}$ | $5.60 \times 10^{+04}$ | $3.29 \times 10^{+04}$ |
| 900         | $1.62 \times 10^{-01}$ | $4.13 \times 10^{+02}$ | $2.21 \times 10^{+02}$ |
| 1000        | $8.45 \times 10^{-03}$ | $8.07 \times 10^{+00}$ | $4.00 \times 10^{+00}$ |
| 1200        | $1.00 \times 10^{-04}$ | $2.18 \times 10^{-02}$ | $9.60 \times 10^{-03}$ |
| 1400        | $4.19 \times 10^{-06}$ | $3.14 \times 10^{-04}$ | $1.27 \times 10^{-04}$ |
| 1600        | $3.86 \times 10^{-07}$ | $1.30 \times 10^{-05}$ | $4.94 \times 10^{-06}$ |
| 1800        | $6.01 \times 10^{-08}$ | $1.08 \times 10^{-06}$ | $3.92 \times 10^{-07}$ |
| 2000        | $1.35 \times 10^{-08}$ | $1.48 \times 10^{-07}$ | $5.13 \times 10^{-08}$ |

# Decomposition of iso-PFOA

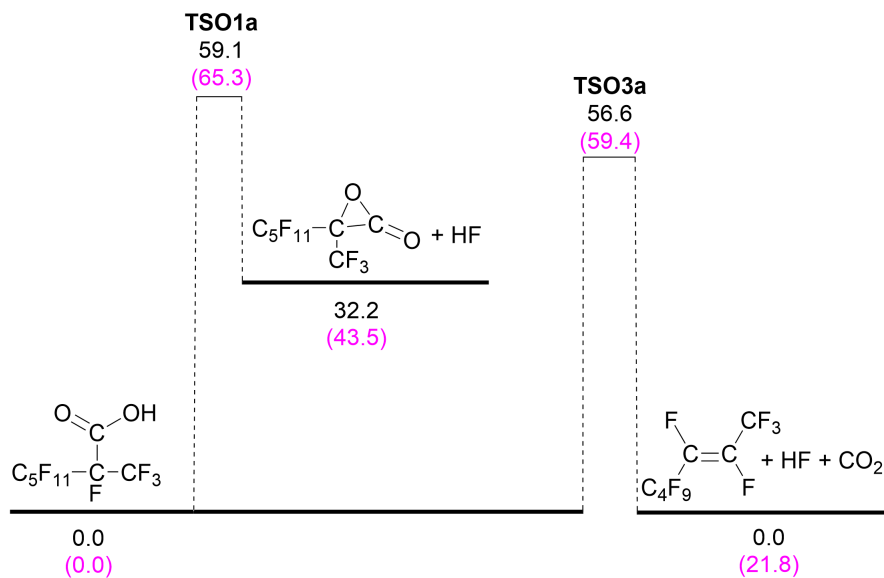

Figure S2: Potential energy diagram for thermal decomposition mechanism for 2,3,3,4,4,5,5,6,6,7,7,7-Dodecafluoro-2-(trifluoromethyl) heptanoic acid (iso-PFOA). Energies are 0 K enthalpies in kcal/mol calculated at the DSD-PBEB95/def2-TZVPP and (M062X/6-31G(2df,p)) levels of theory.

Table S3: Arrhenius expressions for the decomposition channels of iso-PFOA presented in Fig. S2, units are: s, cal, K, and mol.

| Transition states                                                                  | Arrhenius expression (s <sup>-1</sup> )         |
|------------------------------------------------------------------------------------|-------------------------------------------------|
| TSO1a (C <sub>8</sub> F <sub>14</sub> O <sub>2</sub> + HF)                         | $k = 1.15 \times 10^{13} e^{-\frac{59764}{RT}}$ |
| TSO3a (C <sub>4</sub> F <sub>9</sub> CF=CFCF <sub>3</sub> + HF + CO <sub>2</sub> ) | $k = 1.38 \times 10^{14} e^{-\frac{57874}{RT}}$ |

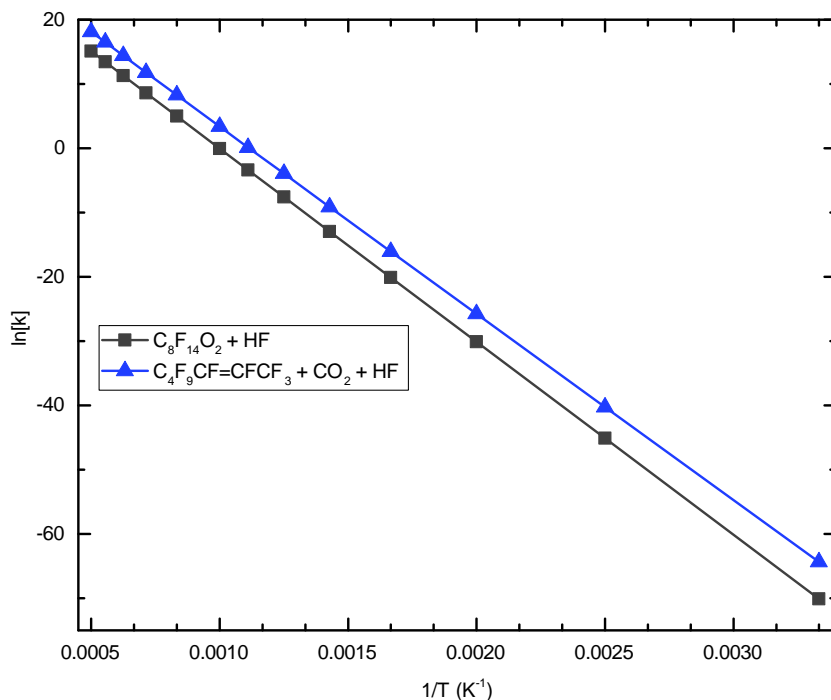

Figure S3: Arrhenius plot of the reaction rate constants,  $k$  ( $\text{s}^{-1}$ ), for the thermal decomposition of iso-PFOA (see PES Fig. S2). Arrhenius expressions for  $\text{C}_8\text{F}_{14}\text{O}_2 + \text{HF}$  (TSO1a), and  $\text{C}_4\text{F}_9\text{CF}=\text{CFCF}_3 + \text{HF} + \text{CO}_2$  (TSO3a) are  $k = 1.15 \times 10^{13} e^{\frac{-59764}{RT}}$ , and  $k = 1.38 \times 10^{14} e^{\frac{-57874}{RT}}$ , respectively, (units are s, cal, K, mol).

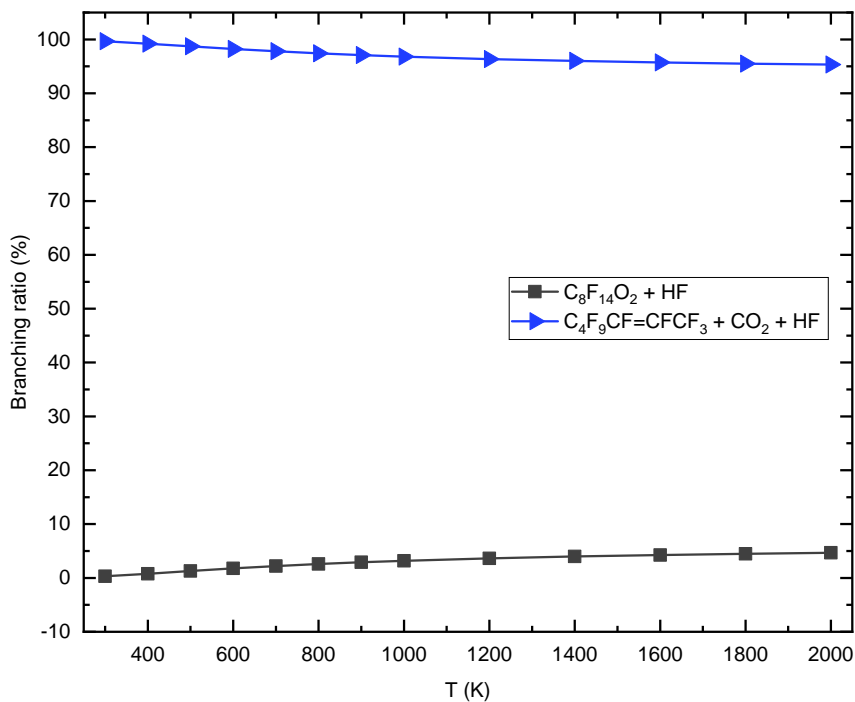

Figure S4: Branching ratio of the degradation products for the thermal decomposition of iso-PFOA (see PES Fig. S2),  $\text{C}_8\text{F}_{14}\text{O}_2 + \text{HF}$  (TSO1a), and  $\text{C}_4\text{F}_9\text{CF}=\text{CFCF}_3 + \text{HF} + \text{CO}_2$  (TSO3a).

Table S4: Half lives of iso-PFOA based on the transition state TSO1a and TSO3a (assuming a first order decomposition reaction)

| Temperature<br>(K) | TSO1a<br>half life (s) | TSO3a<br>half life (s) |
|--------------------|------------------------|------------------------|
| 300                | $1.92 \times 10^{+30}$ | $6.20 \times 10^{+27}$ |
| 400                | $2.73 \times 10^{+19}$ | $2.14 \times 10^{+17}$ |
| 500                | $8.34 \times 10^{+12}$ | $1.09 \times 10^{+11}$ |
| 600                | $3.75 \times 10^{+08}$ | $6.75 \times 10^{+06}$ |
| 700                | $2.92 \times 10^{+05}$ | $6.57 \times 10^{+03}$ |
| 800                | $1.35 \times 10^{+03}$ | $3.58 \times 10^{+01}$ |
| 900                | $2.06 \times 10^{+01}$ | $6.17 \times 10^{-01}$ |
| 1000               | $7.23 \times 10^{-01}$ | $2.38 \times 10^{-02}$ |
| 1200               | $4.69 \times 10^{-03}$ | $1.77 \times 10^{-04}$ |
| 1400               | $1.27 \times 10^{-04}$ | $5.29 \times 10^{-06}$ |
| 1600               | $8.46 \times 10^{-06}$ | $3.77 \times 10^{-07}$ |
| 1800               | $1.02 \times 10^{-06}$ | $4.80 \times 10^{-08}$ |
| 2000               | $1.88 \times 10^{-07}$ | $9.19 \times 10^{-09}$ |

## Arrhenius plot and branching ratio for Perfluoro-3-Hexyl- $\alpha$ -lactone

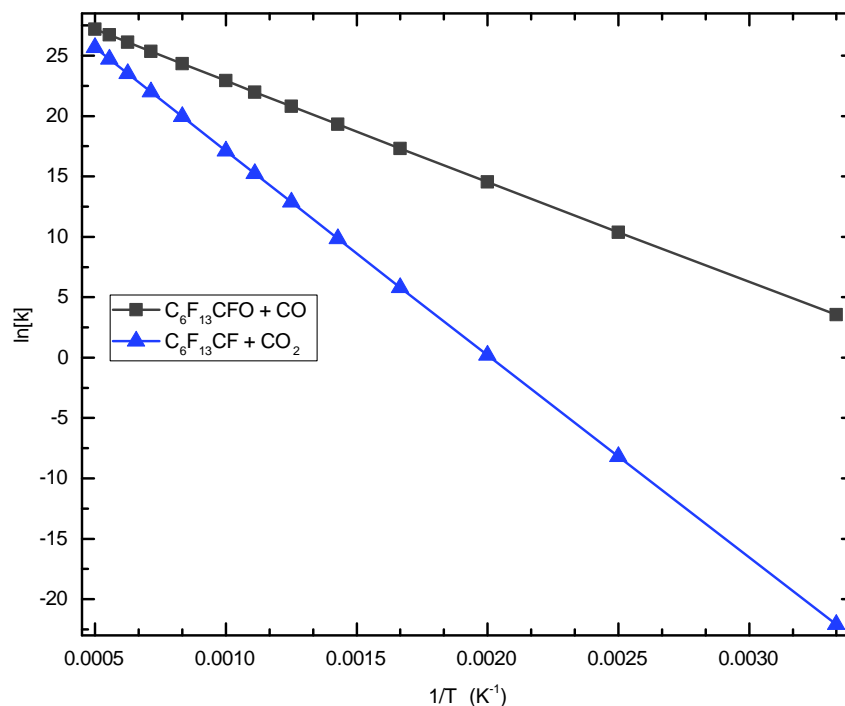

Figure S5: Arrhenius plot of the reaction rate constants,  $k$  ( $\text{s}^{-1}$ ), for the thermal decomposition of Perfluoro-3-Hexyl- $\alpha$ -lactone (PES Fig. 6a (article)). Arrhenius expressions for  $\text{C}_6\text{F}_{13}\text{CFO} + \text{CO}$  (TS1O1), and  $\text{C}_6\text{F}_{13}\text{CF} + \text{CO}_2$  (TS1O2) are  $k = 3.95 \times 10^{13} e^{-\frac{16610}{RT}}$ , and  $k = 5.91 \times 10^{14} e^{-\frac{33528}{RT}}$ , respectively, (units are s, cal, K, mol).

Table S5: Arrhenius expressions for the decomposition channels presented in Fig. 6 (article), units are: s, cal, K, and mol.

| Transition states                                          | Arrhenius expression                               |
|------------------------------------------------------------|----------------------------------------------------|
| TS1O1 ( $\text{C}_6\text{F}_{13}\text{CFO} + \text{CO}$ )  | $k^a = 3.95 \times 10^{13} e^{-\frac{16610}{RT}}$  |
| TS1O2 ( $\text{C}_6\text{F}_{13}\text{CF} + \text{CO}_2$ ) | $k^a = 5.91 \times 10^{14} e^{-\frac{33528}{RT}}$  |
| TS1O3 ( $\text{C}_6\text{F}_{13}\text{COOH} + \text{HF}$ ) | $k^b = 8.68 \times 10^{-15} e^{-\frac{38665}{RT}}$ |

<sup>a</sup> the unit of the  $k$  is  $\text{s}^{-1}$

<sup>b</sup> the unit of the  $k$  is  $\text{cm}^3 \text{molecule}^{-1} \text{s}^{-1}$

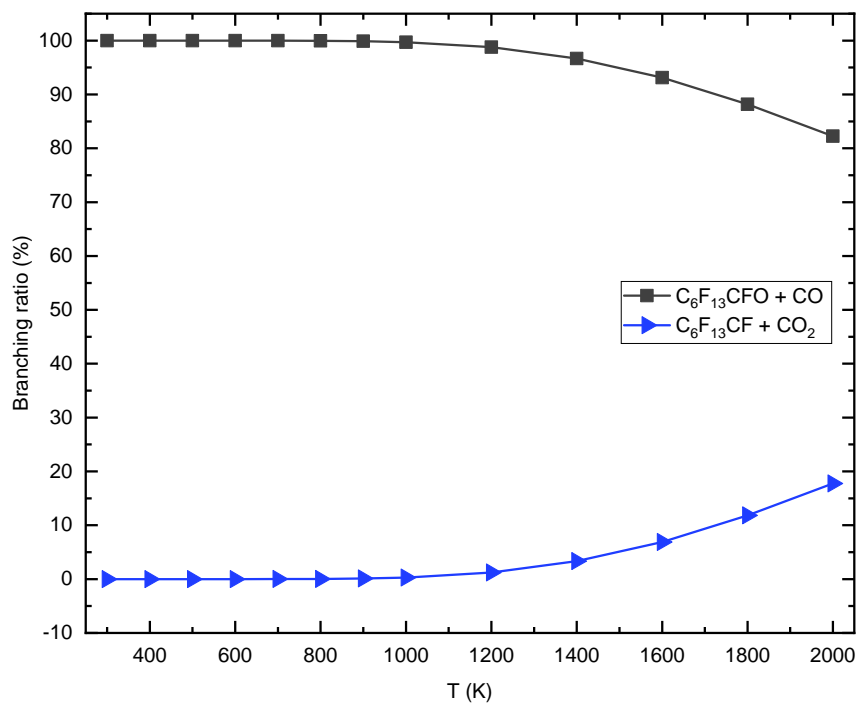

Figure S6: Branching ratio of the degradation products for the thermal decomposition of Perfluoro-3-Hexyl- $\alpha$ -lactone (PES Fig. 6a (article) ),  $C_6F_{13}CFO + CO$  (TS1O1), and  $C_6F_{13}CF + CO_2$  (TS1O2).

Table S6: Half lives of Perfluoro-3-Hexyl- $\alpha$ -lactone based on the transition state TS1O1 and TS1O2

| Temperature<br>(K) | TS1O1                  | TS1O2                  |
|--------------------|------------------------|------------------------|
|                    | half life (s)          | half life (s)          |
| 300                | $1.98 \times 10^{-02}$ | $2.71 \times 10^{+09}$ |
| 400                | $2.14 \times 10^{-05}$ | $2.52 \times 10^{+03}$ |
| 500                | $3.41 \times 10^{-07}$ | $5.75 \times 10^{-01}$ |
| 600                | $2.11 \times 10^{-08}$ | $2.08 \times 10^{-03}$ |
| 700                | $2.86 \times 10^{-09}$ | $3.71 \times 10^{-05}$ |
| 800                | $6.35 \times 10^{-10}$ | $1.79 \times 10^{-06}$ |
| 900                | $1.96 \times 10^{-10}$ | $1.69 \times 10^{-07}$ |
| 1000               | $7.64 \times 10^{-11}$ | $2.55 \times 10^{-08}$ |
| 1200               | $1.85 \times 10^{-11}$ | $1.49 \times 10^{-09}$ |
| 1400               | $6.71 \times 10^{-12}$ | $1.95 \times 10^{-10}$ |
| 1600               | $3.13 \times 10^{-12}$ | $4.23 \times 10^{-11}$ |
| 1800               | $1.73 \times 10^{-12}$ | $1.29 \times 10^{-11}$ |
| 2000               | $1.07 \times 10^{-12}$ | $4.97 \times 10^{-12}$ |



# Decomposition of Perfluoroheptanoic acid

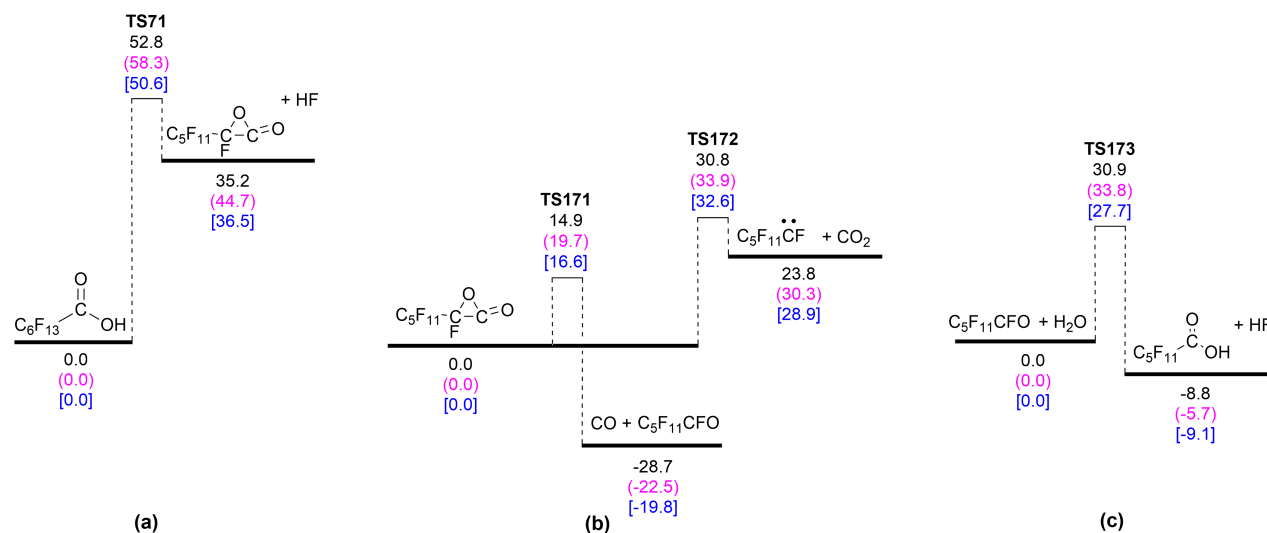

Figure S7: Potential energy diagram for thermal decomposition mechanism of (a) Perfluoroheptanoic acid, (b) Perfluoro-3-Pentyl- $\alpha$ -lactone, (c) hydrolysis of perfluoro-hexane aldehyde to Perfluorohexanoic acid, Energies are (0 K enthalpies, kcal/mol) calculated at the DSD-PBEB95/def2-TZVPP, (M062X/6-31G(2df,p)), [PBE0/def2-TZVPP] levels of theory.

Table S7: Arrhenius expressions for the decomposition channels presented in Fig. S7, units are: s, cal, K, and mol.

| Transition states               | Arrhenius expression                               |
|---------------------------------|----------------------------------------------------|
| TS71 ( $C_5F_{11}CFCO_2 + HF$ ) | $k^a = 1.98 \times 10^{13} e^{-\frac{53669}{RT}}$  |
| TS171 ( $C_5F_{11}CFO + CO$ )   | $k^a = 3.29 \times 10^{13} e^{-\frac{15983}{RT}}$  |
| TS172 ( $C_5F_{11}CF + CO_2$ )  | $k^a = 5.89 \times 10^{14} e^{-\frac{32414}{RT}}$  |
| TS173 ( $C_5F_{11}COH + HF$ )   | $k^b = 1.86 \times 10^{-15} e^{-\frac{32076}{RT}}$ |

<sup>a</sup> the unit of the k is  $s^{-1}$

<sup>b</sup> the unit of the k is  $cm^3 \text{ molecule}^{-1} s^{-1}$

Table S8: Half lives of Perfluoroheptanoic acid (TS71) and Perfluoro-3-Pentyl- $\alpha$ -lactone (TS171, and TS172) by assuming a first order decomposition reaction.

| Temperature | TS71                   | TS171                  | TS172                  |
|-------------|------------------------|------------------------|------------------------|
| (K)         | half life (s)          | half life (s)          | half life (s)          |
| 300         | $4.03 \times 10^{+25}$ | $8.30 \times 10^{-03}$ | $4.19 \times 10^{+08}$ |
| 400         | $7.46 \times 10^{+15}$ | $1.17 \times 10^{-05}$ | $6.24 \times 10^{+02}$ |
| 500         | $1.05 \times 10^{+10}$ | $2.17 \times 10^{-07}$ | $1.88 \times 10^{-01}$ |
| 600         | $1.31 \times 10^{+06}$ | $1.50 \times 10^{-08}$ | $8.23 \times 10^{-04}$ |
| 700         | $2.11 \times 10^{+03}$ | $2.19 \times 10^{-09}$ | $1.67 \times 10^{-05}$ |
| 800         | $1.68 \times 10^{+01}$ | $5.13 \times 10^{-10}$ | $8.94 \times 10^{-07}$ |
| 900         | $3.92 \times 10^{-01}$ | $1.66 \times 10^{-10}$ | $9.12 \times 10^{-08}$ |
| 1000        | $1.93 \times 10^{-02}$ | $6.69 \times 10^{-11}$ | $1.46 \times 10^{-08}$ |
| 1200        | $2.10 \times 10^{-04}$ | $1.71 \times 10^{-11}$ | $9.35 \times 10^{-10}$ |
| 1400        | $8.23 \times 10^{-06}$ | $6.43 \times 10^{-12}$ | $1.31 \times 10^{-10}$ |
| 1600        | $7.22 \times 10^{-07}$ | $3.08 \times 10^{-12}$ | $2.98 \times 10^{-11}$ |
| 1800        | $1.08 \times 10^{-07}$ | $1.74 \times 10^{-12}$ | $9.45 \times 10^{-12}$ |
| 2000        | $2.37 \times 10^{-08}$ | $1.10 \times 10^{-12}$ | $3.76 \times 10^{-12}$ |

# Decomposition of Perfluorohexanoic acid

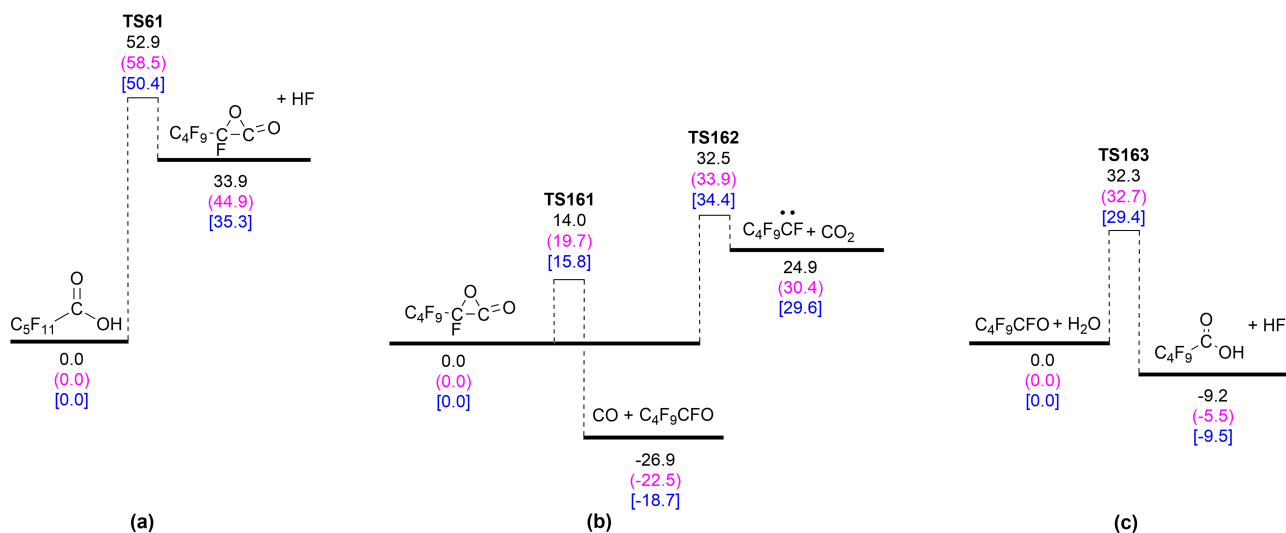

Figure S8: Potential energy diagram for thermal decomposition mechanism of (a) Perfluorohexanoic acid, (b) Perfluoro-3-Butyl- $\alpha$ -lactone, (c) hydrolysis of perfluoro-pentane aldehyde to Perfluoropentanoic acid, Energies are (0 K enthalpies, kcal/mol) calculated at the DSD-PBEB95/def2-TZVPP, (M062X/6-31G(2df,p)), [PBE0/def2-TZVPP] levels of theory.

Table S9: Arrhenius expressions for the decomposition channels presented in Fig. S8, units are: s, cal, K, and mol.

| Transition states            | Arrhenius expression                               |
|------------------------------|----------------------------------------------------|
| TS61 ( $C_4F_9CFCO_2 + HF$ ) | $k^a = 2.80 \times 10^{13} e^{\frac{-53801}{RT}}$  |
| TS161 ( $C_4F_9CFO + CO$ )   | $k^a = 3.42 \times 10^{13} e^{\frac{-15108}{RT}}$  |
| TS162 ( $C_4F_9CF + CO_2$ )  | $k^a = 1.22 \times 10^{14} e^{\frac{-33980}{RT}}$  |
| TS163 ( $C_4F_9COOH + HF$ )  | $k^b = 3.30 \times 10^{-15} e^{\frac{-33509}{RT}}$ |

<sup>a</sup> the unit of the k is  $s^{-1}$

<sup>b</sup> the unit of the k is  $cm^3 \text{ molecule}^{-1} s^{-1}$

Table S10: Half lives of Perfluorohexanoic acid (TS61) and Perfluoro-3-Butyl- $\alpha$ -lactone (TS161, and TS162) by assuming a first order decomposition reaction.

| Temperature | TS61                   | TS161                  | TS162                  |
|-------------|------------------------|------------------------|------------------------|
| (K)         | half life (s)          | half life (s)          | half life (s)          |
| 300         | $3.56 \times 10^{+25}$ | $1.84 \times 10^{-03}$ | $2.80 \times 10^{+10}$ |
| 400         | $6.24 \times 10^{+15}$ | $3.73 \times 10^{-06}$ | $2.16 \times 10^{+04}$ |
| 500         | $8.51 \times 10^{+09}$ | $8.67 \times 10^{-08}$ | $4.38 \times 10^{+00}$ |
| 600         | $1.03 \times 10^{+06}$ | $6.90 \times 10^{-09}$ | $1.47 \times 10^{-02}$ |
| 700         | $1.64 \times 10^{+03}$ | $1.12 \times 10^{-09}$ | $2.48 \times 10^{-04}$ |
| 800         | $1.30 \times 10^{+01}$ | $2.84 \times 10^{-10}$ | $1.15 \times 10^{-05}$ |
| 900         | $2.99 \times 10^{-01}$ | $9.76 \times 10^{-11}$ | $1.05 \times 10^{-06}$ |
| 1000        | $1.46 \times 10^{-02}$ | $4.14 \times 10^{-11}$ | $1.55 \times 10^{-07}$ |
| 1200        | $1.57 \times 10^{-04}$ | $1.14 \times 10^{-11}$ | $8.70 \times 10^{-09}$ |
| 1400        | $6.12 \times 10^{-06}$ | $4.51 \times 10^{-12}$ | $1.11 \times 10^{-09}$ |
| 1600        | $5.33 \times 10^{-07}$ | $2.25 \times 10^{-12}$ | $2.36 \times 10^{-10}$ |
| 1800        | $7.96 \times 10^{-08}$ | $1.31 \times 10^{-12}$ | $7.07 \times 10^{-11}$ |
| 2000        | $1.74 \times 10^{-08}$ | $8.47 \times 10^{-13}$ | $2.70 \times 10^{-11}$ |

# Decomposition of Perfluoropentanoic acid

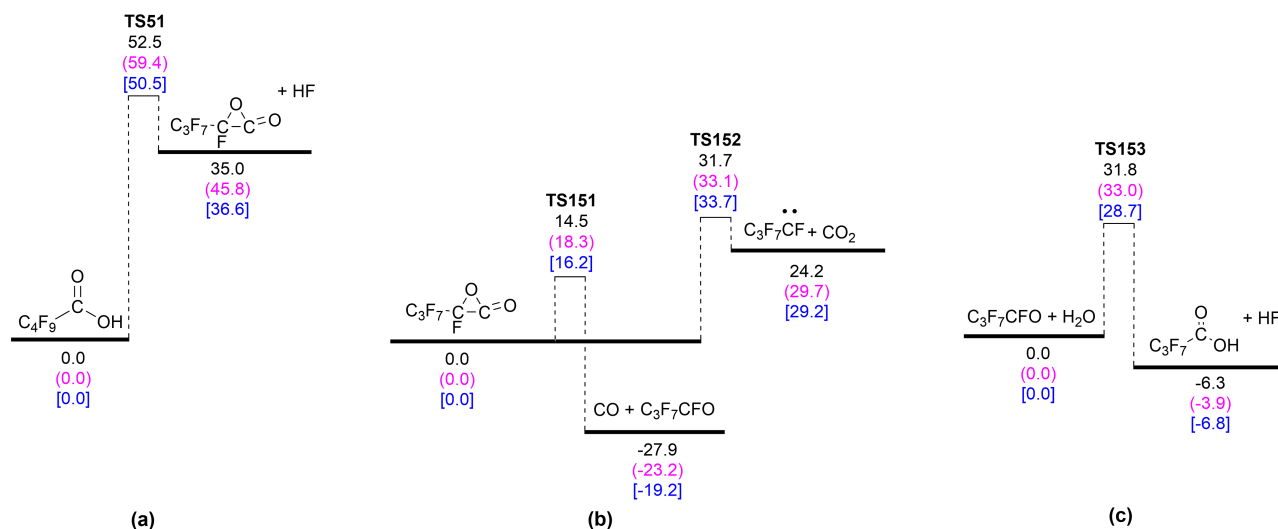

Figure S9: Potential energy diagram for thermal decomposition mechanism of (a) Perfluoropentanoic acid, (b) Perfluoro-3-Propyl- $\alpha$ -lactone, (c) hydrolysis of perfluoro-butane aldehyde to Perfluorobutanoic acid, Energies are (0 K enthalpies, kcal/mol) calculated at the DSD-PBEB95/def2-TZVPP, (M062X/6-31G(2df,p)), [PBE0/def2-TZVPP] levels of theory.

Table S11: Arrhenius expressions for the decomposition channels presented in Fig. S9, units are: s, cal, K, and mol.

| Transition states            | Arrhenius expression                               |
|------------------------------|----------------------------------------------------|
| TS51 ( $C_3F_7CFCO_2 + HF$ ) | $k^a = 2.25 \times 10^{13} e^{-\frac{53400}{RT}}$  |
| TS151 ( $C_3F_7CFO + CO$ )   | $k^a = 2.51 \times 10^{13} e^{-\frac{15611}{RT}}$  |
| TS152 ( $C_3F_7CF + CO_2$ )  | $k^a = 9.29 \times 10^{13} e^{-\frac{33156}{RT}}$  |
| TS153 ( $C_3F_7COOH + HF$ )  | $k^b = 3.56 \times 10^{-16} e^{-\frac{32807}{RT}}$ |

<sup>a</sup> the unit of the k is  $s^{-1}$

<sup>b</sup> the unit of the k is  $cm^3 \text{ molecule}^{-1} s^{-1}$

Table S12: Half lives of Perfluoropentanoic acid (TS51) and Perfluoro-3-Propyl- $\alpha$ -lactone (TS151, and TS152) by assuming a first order decomposition reaction.

| Temperature | TS51                   | TS151                  | TS152                  |
|-------------|------------------------|------------------------|------------------------|
| (K)         | half life (s)          | half life (s)          | half life (s)          |
| 300         | $2.27 \times 10^{+25}$ | $5.83 \times 10^{-03}$ | $9.28 \times 10^{+09}$ |
| 400         | $4.70 \times 10^{+15}$ | $9.60 \times 10^{-06}$ | $1.01 \times 10^{+04}$ |
| 500         | $7.09 \times 10^{+09}$ | $1.96 \times 10^{-07}$ | $2.51 \times 10^{+00}$ |
| 600         | $9.21 \times 10^{+05}$ | $1.44 \times 10^{-08}$ | $9.70 \times 10^{-03}$ |
| 700         | $1.53 \times 10^{+03}$ | $2.19 \times 10^{-09}$ | $1.81 \times 10^{-04}$ |
| 800         | $1.26 \times 10^{+01}$ | $5.33 \times 10^{-10}$ | $9.04 \times 10^{-06}$ |
| 900         | $2.98 \times 10^{-01}$ | $1.76 \times 10^{-10}$ | $8.75 \times 10^{-07}$ |
| 1000        | $1.49 \times 10^{-02}$ | $7.27 \times 10^{-11}$ | $1.35 \times 10^{-07}$ |
| 1200        | $1.66 \times 10^{-04}$ | $1.92 \times 10^{-11}$ | $8.11 \times 10^{-09}$ |
| 1400        | $6.60 \times 10^{-06}$ | $7.38 \times 10^{-12}$ | $1.08 \times 10^{-09}$ |
| 1600        | $5.86 \times 10^{-07}$ | $3.60 \times 10^{-12}$ | $2.40 \times 10^{-10}$ |
| 1800        | $8.87 \times 10^{-08}$ | $2.06 \times 10^{-12}$ | $7.40 \times 10^{-11}$ |
| 2000        | $1.95 \times 10^{-08}$ | $1.31 \times 10^{-12}$ | $2.89 \times 10^{-11}$ |

# Decomposition of Perfluorobutanoic acid

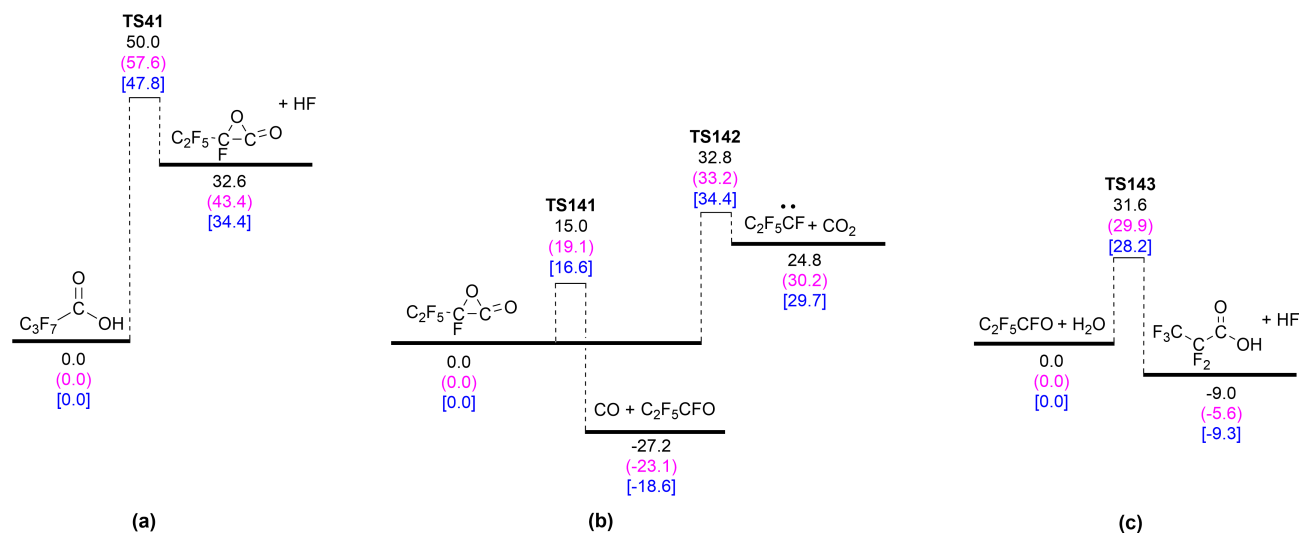

Figure S10: Potential energy diagram for thermal decomposition mechanism of (a) Perfluorobutanoic acid, (b) Perfluoro-3-Ethyl- $\alpha$ -lactone, (c) hydrolysis of perfluoro-propane aldehyde to Pentafluoropropionic acid, Energies are (0 K enthalpies, kcal/mol) calculated at the DSD-PBEB95/def2-TZVPP, (M062X/6-31G(2df,p)), [PBE0/def2-TZVPP] levels of theory.

Table S13: Arrhenius expressions for the decomposition channels presented in Fig. S10, units are: s, cal, K, and mol.

| Transition states            | Arrhenius expression                               |
|------------------------------|----------------------------------------------------|
| TS41 ( $C_2F_5CFCO_2 + HF$ ) | $k^a = 6.93 \times 10^{13} e^{-\frac{50915}{RT}}$  |
| TS141 ( $C_2F_5CFO + CO$ )   | $k^a = 2.55 \times 10^{13} e^{-\frac{16064}{RT}}$  |
| TS142 ( $C_2F_5CF + CO_2$ )  | $k^a = 1.26 \times 10^{14} e^{-\frac{34221}{RT}}$  |
| TS143 ( $C_2F_5COOH + HF$ )  | $k^b = 1.50 \times 10^{-15} e^{-\frac{32785}{RT}}$ |

<sup>a</sup> the unit of the k is  $s^{-1}$

<sup>b</sup> the unit of the k is  $cm^3 \text{ molecule}^{-1} s^{-1}$

Table S14: Half lives of Perfluorobutanoic acid (TS41) and Perfluoro-3-Ethyl- $\alpha$ -lactone (TS141, and TS142) by assuming a first order decomposition reaction.

| Temperature | TS41                   | TS141                  | TS142                  |
|-------------|------------------------|------------------------|------------------------|
| (K)         | half life (s)          | half life (s)          | half life (s)          |
| 300         | $1.14 \times 10^{+23}$ | $1.23 \times 10^{-02}$ | $4.09 \times 10^{+10}$ |
| 400         | $6.66 \times 10^{+13}$ | $1.67 \times 10^{-05}$ | $2.83 \times 10^{+04}$ |
| 500         | $1.88 \times 10^{+08}$ | $3.04 \times 10^{-07}$ | $5.39 \times 10^{+00}$ |
| 600         | $3.70 \times 10^{+04}$ | $2.06 \times 10^{-08}$ | $1.74 \times 10^{-02}$ |
| 700         | $8.29 \times 10^{+01}$ | $2.99 \times 10^{-09}$ | $2.86 \times 10^{-04}$ |
| 800         | $8.51 \times 10^{-01}$ | $6.96 \times 10^{-10}$ | $1.30 \times 10^{-05}$ |
| 900         | $2.40 \times 10^{-02}$ | $2.24 \times 10^{-10}$ | $1.17 \times 10^{-06}$ |
| 1000        | $1.38 \times 10^{-03}$ | $8.99 \times 10^{-11}$ | $1.69 \times 10^{-07}$ |
| 1200        | $1.89 \times 10^{-05}$ | $2.28 \times 10^{-11}$ | $9.32 \times 10^{-09}$ |
| 1400        | $8.76 \times 10^{-07}$ | $8.55 \times 10^{-12}$ | $1.17 \times 10^{-09}$ |
| 1600        | $8.70 \times 10^{-08}$ | $4.09 \times 10^{-12}$ | $2.47 \times 10^{-10}$ |
| 1800        | $1.44 \times 10^{-08}$ | $2.30 \times 10^{-12}$ | $7.33 \times 10^{-11}$ |
| 2000        | $3.40 \times 10^{-09}$ | $1.45 \times 10^{-12}$ | $2.78 \times 10^{-11}$ |



# Decomposition of Pentafluoropropionic acid

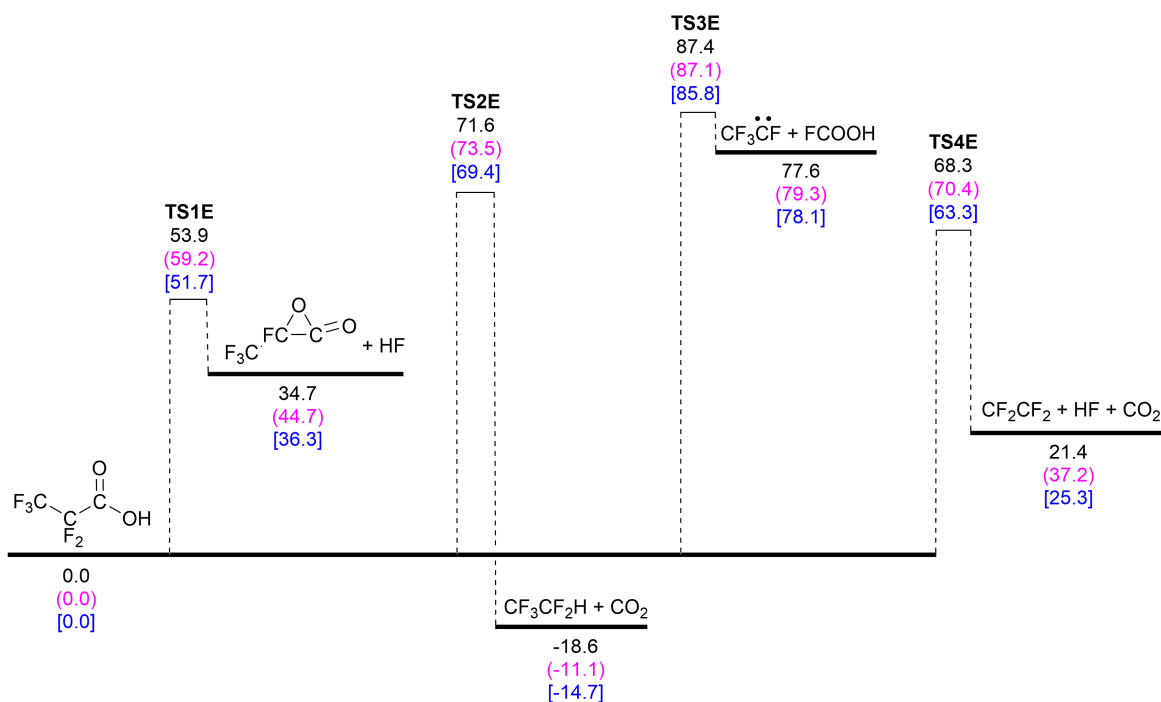

Figure S11: Potential energy diagram for thermal decomposition mechanism for Pentafluoropropionic acid. Energies are 0 K enthalpies in kcal/mol calculated at the DSD-PBEB95/def2-TZVPP, (M062X/6-31G(2df,p)), [PBE0 /def2-TZVPP] levels of theory.

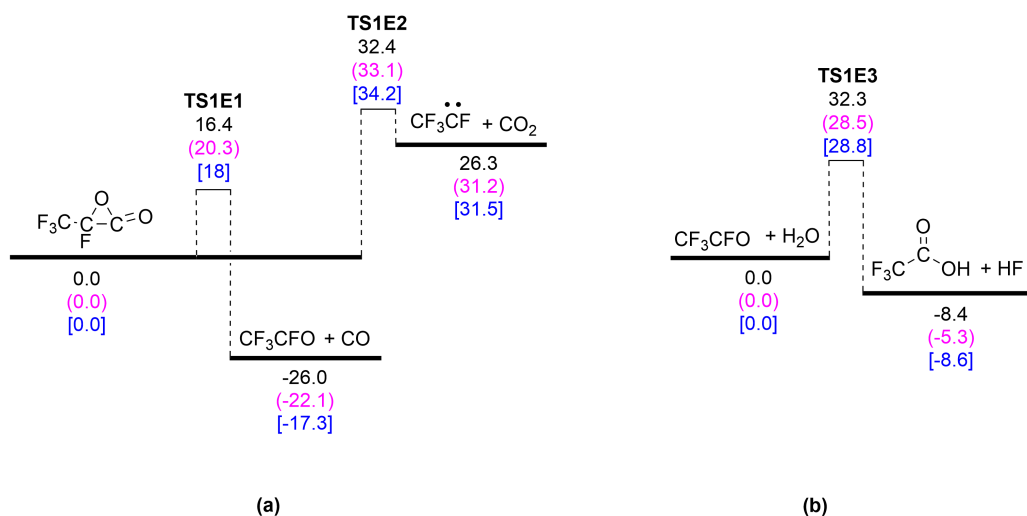

Figure S12: Potential energy diagram for thermal decomposition mechanism for (a) Perfluoro-3-Methyl- $\alpha$ -lactone, (b) hydrolysis of perfluoroacetyl fluoride to trifluoroacetic acid (TFA), Energies are (0 K enthalpies, kcal/mol) calculated at the DSD-PBEB95/def2-TZVPP, (M062X/6-31G(2df,p)), [PBE0/def2-TZVPP] levels of theory.

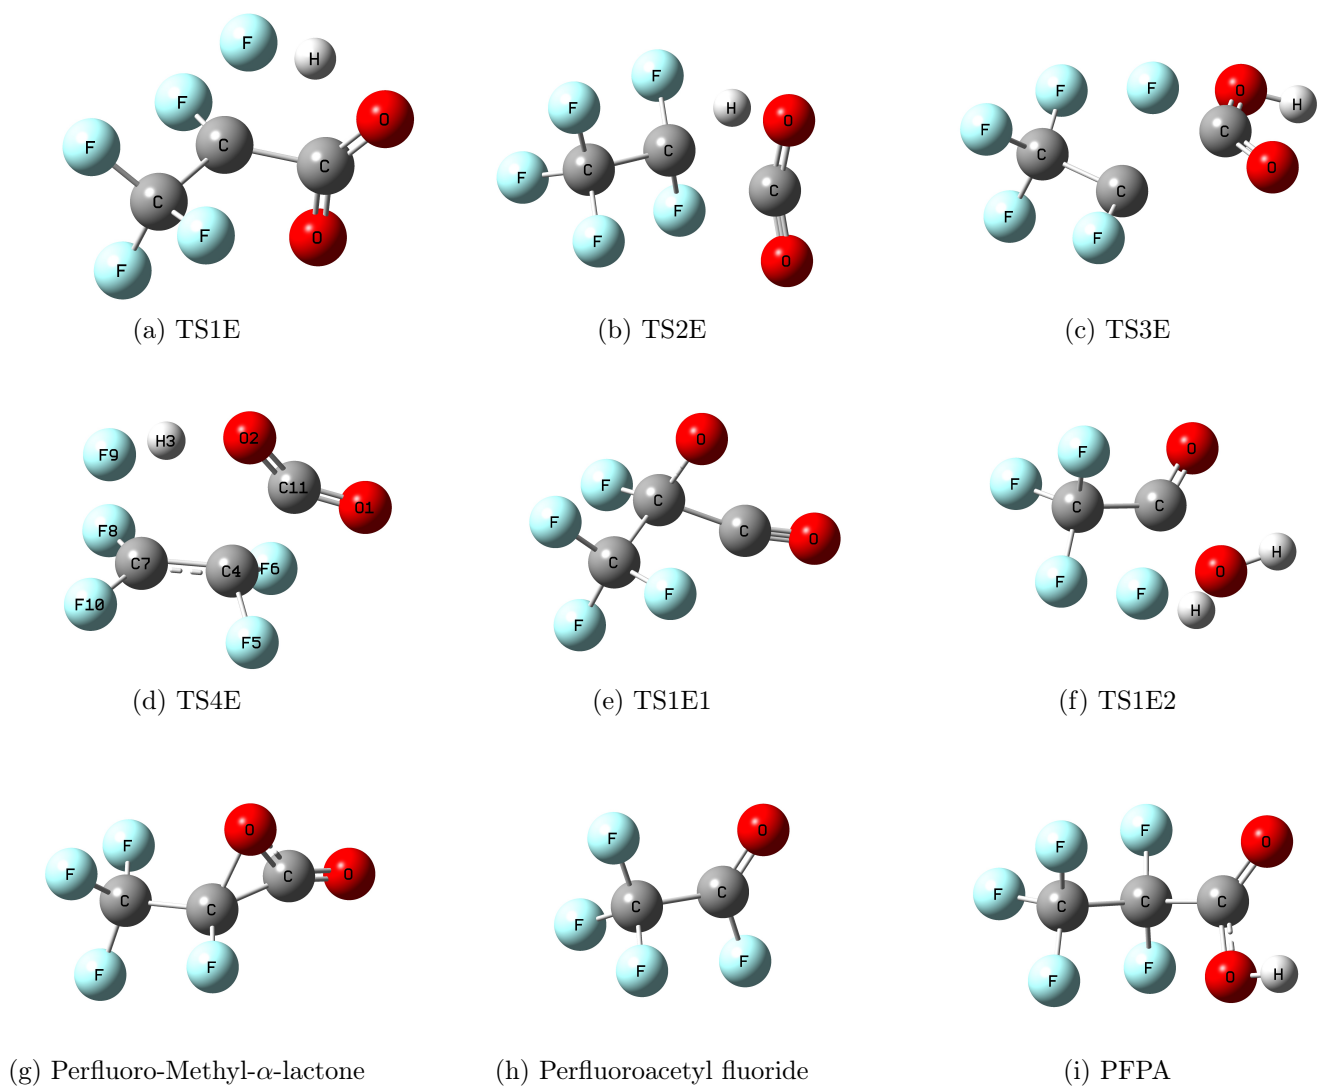

Figure S13: Optimized transition states and ground state structures reported in Figure S11 and Figure S12, Transition states (a-f) Perfluoro-Methyl- $\alpha$ -lactone (g), Perfluoroacetyl fluoride (h), TFA (i) at the M06-2X/6-31G(2df,p) level of theory

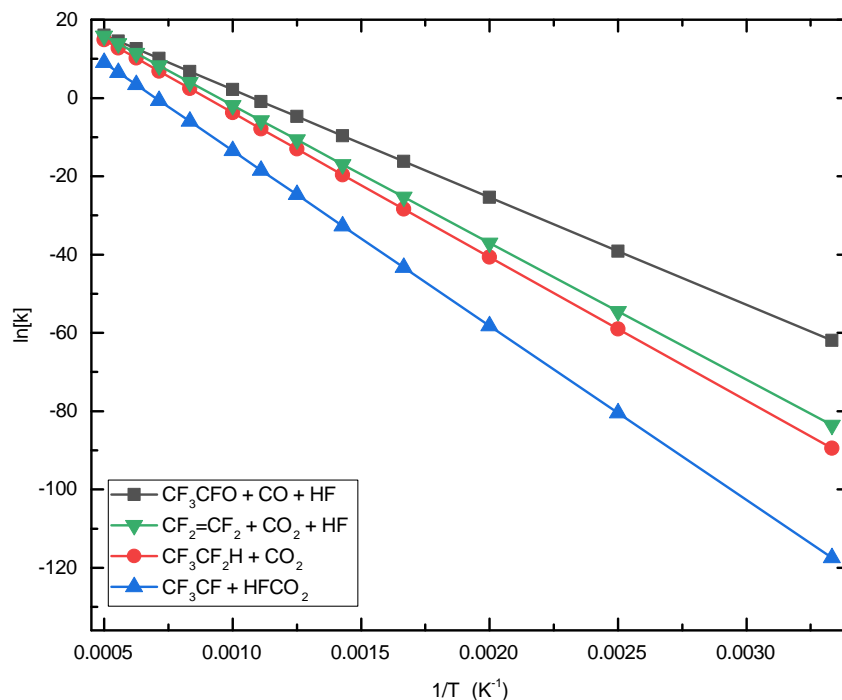

Figure S14: Arrhenius plot of the reaction rate coefficients,  $k$  ( $\text{s}^{-1}$ ), for the thermal decomposition of Pentafluoropropionic acid (see PES Fig. S11). Arrhenius expressions for  $\text{CF}_3\text{CFO} + \text{CO} + \text{HF}$  (TS1E),  $+ \text{CF}_3\text{CF}_2\text{H} + \text{CO}_2$  (TS2E),  $\text{CF}_3\text{CF} + \text{FCOOH}$  (TS3E), and  $\text{CF}_2\text{CF}_2 + \text{HF} + \text{CO}_2$  (TS4E) are  $k = 8.10 \times 10^{12} e^{-\frac{54706}{RT}}$ ,  $k = 2.40 \times 10^{14} e^{-\frac{73180}{RT}}$ ,  $k = 3.75 \times 10^{13} e^{-\frac{88780}{RT}}$ , and  $k = 2.90 \times 10^{14} e^{-\frac{69763}{RT}}$  respectively (units are s, cal, K, mol).

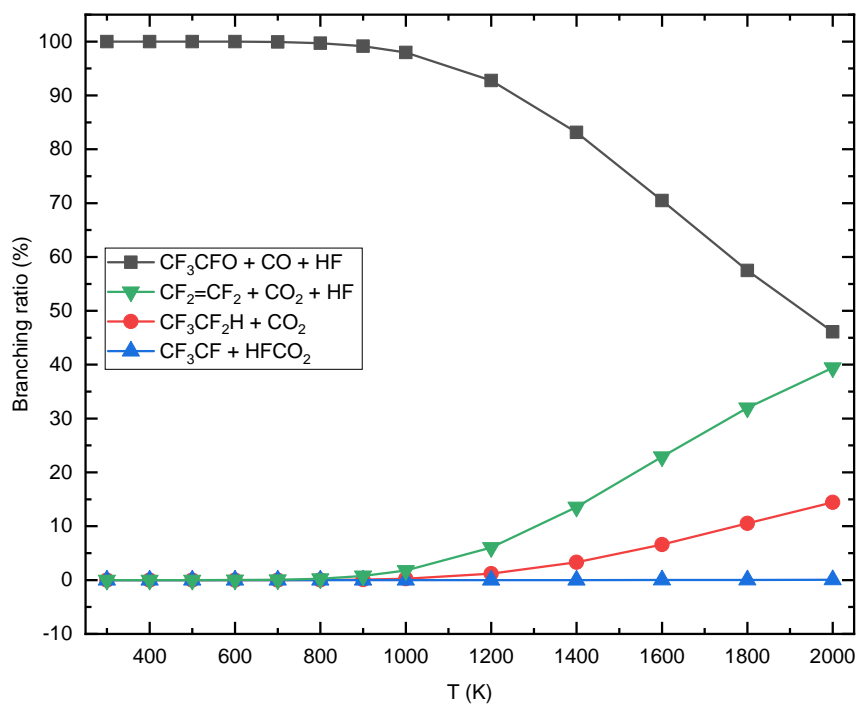

Figure S15: Branching ratio of the degradation products for the thermal decomposition of Pentafluoropropionic acid (see PES Fig. 4 in the article),  $\text{CF}_3\text{CFO} + \text{CO} + \text{HF}$  (TS1E),  $+ \text{CF}_3\text{CF}_2\text{H} + \text{CO}_2$  (TS2E),  $\text{CF}_3\text{CF} + \text{FCOOH}$  (TS3E), and  $\text{CF}_2\text{CF}_2 + \text{HF} + \text{CO}_2$  (TS4E).

Table S15: Arrhenius expressions for the decomposition channels presented in Fig. S11, and Fig. S12, units are: s, cal, K, and mol.

| Transition states                             | Arrhenius expression                               |
|-----------------------------------------------|----------------------------------------------------|
| TS1E (CF <sub>3</sub> CFCO <sub>2</sub> + HF) | $k^a = 8.10 \times 10^{12} e^{-\frac{54706}{RT}}$  |
| TS1E1 (CF <sub>3</sub> CFO + CO)              | $k^a = 4.81 \times 10^{13} e^{-\frac{17533}{RT}}$  |
| TS1E2 (CF <sub>3</sub> CF + CO <sub>2</sub> ) | $k^a = 1.72 \times 10^{14} e^{-\frac{33884}{RT}}$  |
| TS1E3 (CF <sub>3</sub> COOH + HF)             | $k^b = 4.13 \times 10^{-15} e^{-\frac{33581}{RT}}$ |

<sup>a</sup> the unit of the k is s<sup>-1</sup>

<sup>b</sup> the unit of the k is cm<sup>3</sup> molecule<sup>-1</sup> s<sup>-1</sup>

Table S16: Half lives of Pentafluoropropionic acid (TS1E) and Perfluoro-Methyl- $\alpha$ -lactone (TS1E1, and TS1E2) by assuming a first order decomposition reaction.

| Temperature<br>(K) | TS1E                   | TS1E1                  | TS1E2                  |
|--------------------|------------------------|------------------------|------------------------|
|                    | half life (s)          | half life (s)          | half life (s)          |
| 300                | $5.68 \times 10^{+26}$ | $7.63 \times 10^{-02}$ | $1.70 \times 10^{+10}$ |
| 400                | $6.72 \times 10^{+16}$ | $5.62 \times 10^{-05}$ | $1.35 \times 10^{+04}$ |
| 500                | $7.27 \times 10^{+10}$ | $7.09 \times 10^{-07}$ | $2.82 \times 10^{+00}$ |
| 600                | $7.59 \times 10^{+06}$ | $3.76 \times 10^{-08}$ | $9.62 \times 10^{-03}$ |
| 700                | $1.08 \times 10^{+04}$ | $4.56 \times 10^{-09}$ | $1.64 \times 10^{-04}$ |
| 800                | $7.90 \times 10^{+01}$ | $9.31 \times 10^{-10}$ | $7.69 \times 10^{-06}$ |
| 900                | $1.71 \times 10^{+00}$ | $2.70 \times 10^{-10}$ | $7.08 \times 10^{-07}$ |
| 1000               | $7.98 \times 10^{-02}$ | $9.98 \times 10^{-11}$ | $1.05 \times 10^{-07}$ |
| 1200               | $7.95 \times 10^{-04}$ | $2.24 \times 10^{-11}$ | $5.93 \times 10^{-09}$ |
| 1400               | $2.94 \times 10^{-05}$ | $7.67 \times 10^{-12}$ | $7.60 \times 10^{-10}$ |
| 1600               | $2.46 \times 10^{-06}$ | $3.43 \times 10^{-12}$ | $1.62 \times 10^{-10}$ |
| 1800               | $3.56 \times 10^{-07}$ | $1.83 \times 10^{-12}$ | $4.89 \times 10^{-11}$ |
| 2000               | $7.56 \times 10^{-08}$ | $1.11 \times 10^{-12}$ | $1.87 \times 10^{-11}$ |

# Decomposition of Perfluorononanoic acid (PFNA)

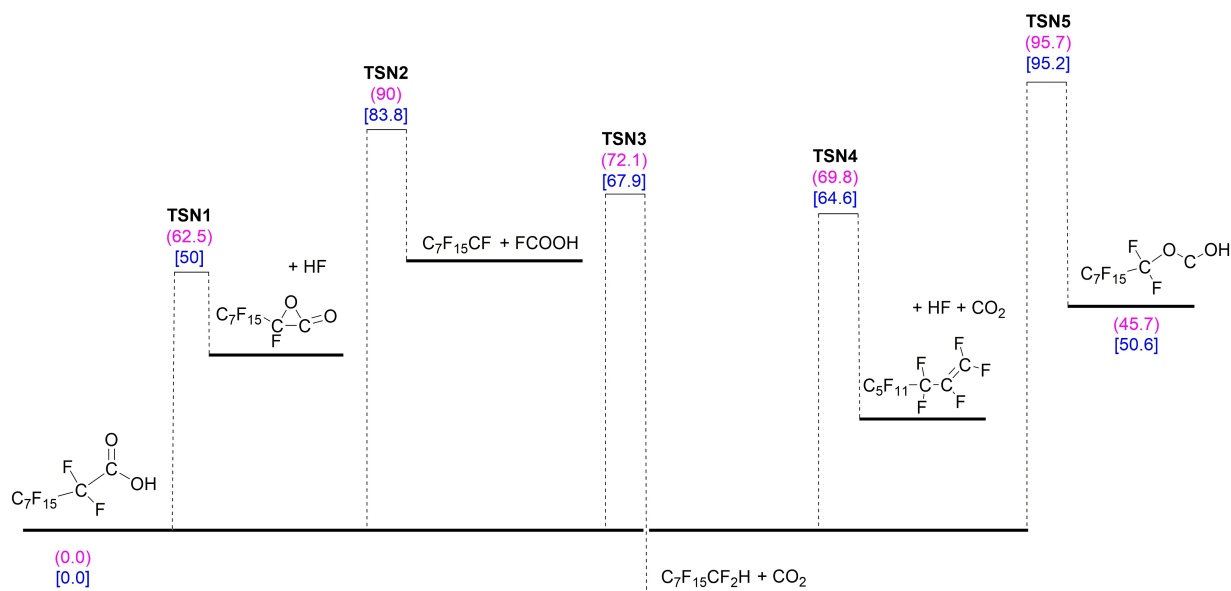

Figure S16: Potential energy diagram for thermal decomposition mechanism for Perfluorononanoic acid (PFNA). Energies are 0 K enthalpies in kcal/mol calculated at the (M062X/6-31G(2df,p)), [PBE0/def2-TZVPP] levels of theory.

Table S17: Arrhenius expressions for the decomposition of Perfluorononanoic acid presented in Fig. S16, units are: s, cal, K, and mol.

| Transition states                    | Arrhenius expression ( $s^{-1}$ )               |
|--------------------------------------|-------------------------------------------------|
| TSN1 ( $C_7F_{15}CFCO_2 + HF$ )      | $k = 4.37 \times 10^{13} e^{-\frac{63345}{RT}}$ |
| TSN2 ( $C_7F_{15}CF + FCOOH$ )       | $k = 1.35 \times 10^{14} e^{-\frac{91199}{RT}}$ |
| TSN3 ( $C_7F_{15}CF_2H + CO_2$ )     | $k = 1.24 \times 10^{15} e^{-\frac{73706}{RT}}$ |
| TSN4 ( $C_7F_{14}CF_2 + HF + CO_2$ ) | $k = 5.94 \times 10^{14} e^{-\frac{71120}{RT}}$ |
| TSN5 ( $C_8F_{17}OCOH$ )             | $k = 3.64 \times 10^{13} e^{-\frac{96642}{RT}}$ |

Table S18: Half lives of Perfluorononanoic acid based on the transition state TSN1, TSN3, and TSN4 (assuming a first order decomposition reaction)

| Temperature | TSN1                   | TSN3                   | TSN4                   |
|-------------|------------------------|------------------------|------------------------|
| (K)         | half life (s)          | half life (s)          | half life (s)          |
| 300         | $2.05 \times 10^{+32}$ | $2.26 \times 10^{+38}$ | $6.45 \times 10^{+36}$ |
| 400         | $6.56 \times 10^{+20}$ | $1.07 \times 10^{+25}$ | $8.60 \times 10^{+23}$ |
| 500         | $8.12 \times 10^{+13}$ | $1.03 \times 10^{+17}$ | $1.55 \times 10^{+16}$ |
| 600         | $1.99 \times 10^{+09}$ | $4.49 \times 10^{+11}$ | $1.04 \times 10^{+11}$ |
| 700         | $1.01 \times 10^{+06}$ | $6.54 \times 10^{+07}$ | $2.07 \times 10^{+07}$ |
| 800         | $3.38 \times 10^{+03}$ | $8.56 \times 10^{+04}$ | $3.43 \times 10^{+04}$ |
| 900         | $4.00 \times 10^{+01}$ | $4.85 \times 10^{+02}$ | $2.34 \times 10^{+02}$ |
| 1000        | $1.15 \times 10^{+00}$ | $7.67 \times 10^{+00}$ | $4.30 \times 10^{+00}$ |
| 1200        | $5.52 \times 10^{-03}$ | $1.50 \times 10^{-02}$ | $1.06 \times 10^{-02}$ |
| 1400        | $1.21 \times 10^{-04}$ | $1.72 \times 10^{-04}$ | $1.43 \times 10^{-04}$ |
| 1600        | $6.88 \times 10^{-06}$ | $5.99 \times 10^{-06}$ | $5.65 \times 10^{-06}$ |
| 1800        | $7.35 \times 10^{-07}$ | $4.37 \times 10^{-07}$ | $4.54 \times 10^{-07}$ |
| 2000        | $1.23 \times 10^{-07}$ | $5.35 \times 10^{-08}$ | $6.02 \times 10^{-08}$ |

## Decomposition of Trifluoroacetic acid (TFA)

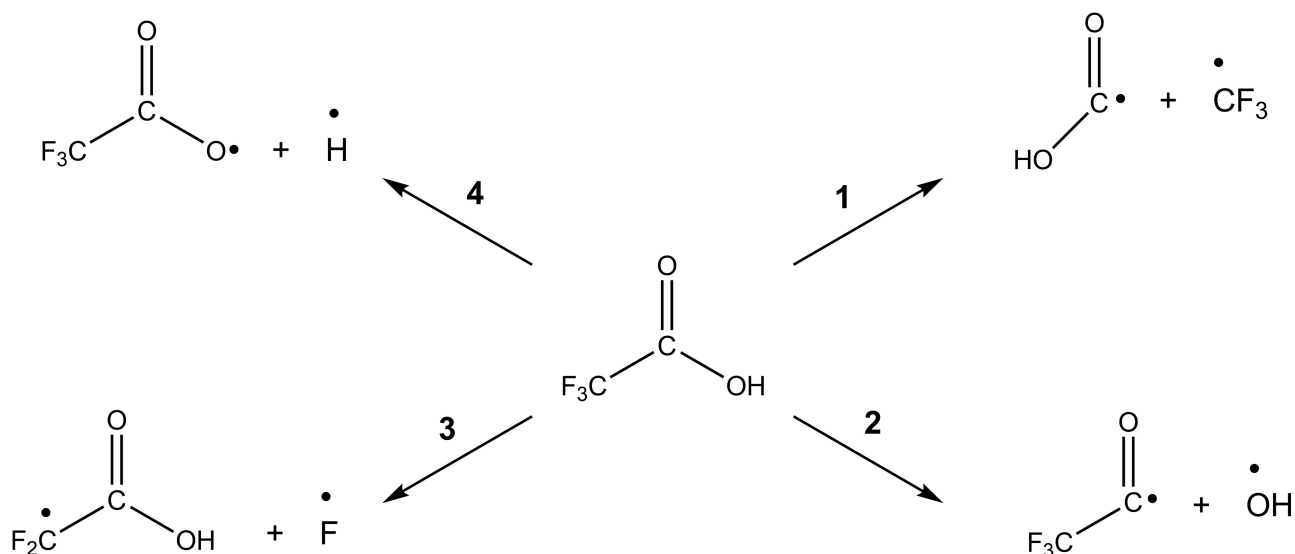

Figure S17: Formation of different radicals resulting from direct bonds dissociation of trifluoroacetic acid (TFA).

Table S19: Energies are 0 K enthalpies in kcal/mol for the different bond dissociation energies of TFA, calculated at different levels of theory with zero-point corrections.

| Reactions <sup>a</sup> | BDE at M062X <sup>b</sup> | BDE at M062X <sup>c</sup> | BDE at PBE0 <sup>d</sup> |
|------------------------|---------------------------|---------------------------|--------------------------|
| 1                      | 90.6                      | 93.6                      | 86.1                     |
| 2                      | 110.7                     | 114.1                     | 107.8                    |
| 3                      | 117                       | 121.3                     | 111.8                    |
| 4                      | 114.4                     | 115.1                     | 107.4                    |

<sup>a</sup> the numbers (1, 2, ...) represents different decomposition channels as per Figure S17

<sup>b</sup> Bond dissociation energies at M062X with 6-31++G(2df,p) basis set

<sup>c</sup> Bond dissociation energies at M062X with 6-31G(2df,p) basis set

<sup>d</sup> Bond dissociation energies at PBE0/def2-TZVPP

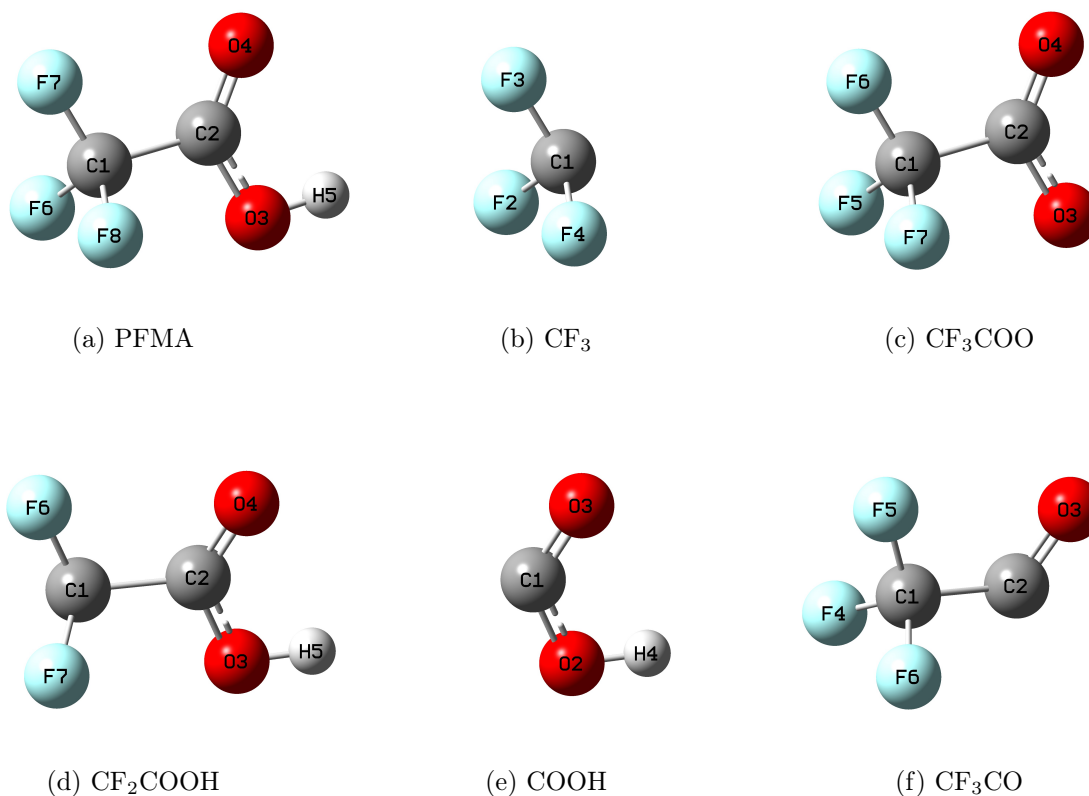

Figure S18: Optimized (M06-2X/6-31G(2df,p)) ground state structures of the key species involve in the radical network of TFA dissociation [S17](#)

Table S20: Energies are 0 K enthalpies in kcal/mol for TFA transition states, calculated at different levels of theory with zero-point corrections.

| Functional / Basis set  | Transition states |      |      |      |      |
|-------------------------|-------------------|------|------|------|------|
|                         | TS1M              | TS2M | TS3M | TS4M | TS5M |
| M062X / 6-31G(2df,p)    | 55.4              | 54.8 | 74.7 | 76.2 | 97.7 |
| M062X / 6-31++G(2df,p)  | 53.7              | 54.4 | 73.9 | 75   | 98.1 |
| M062X / 6-311++G(2df,p) | 54.2              | 54.8 | 74.1 | 75.7 | 99.1 |
| MP2 / 6-31G(2df,p)      | 51.4              | 54.8 | 73   | 78   | 98.6 |
| G4                      | 49.5              | 54.5 | 75   | 75.8 | 99.4 |
| G3XK                    | 49.7              | 53.8 | 73.8 | 76   | 99.4 |
| PBE0/def2-TZVPP         | 48.4              | 52.4 | 70.6 | 73.2 | 97.7 |
| DSD-PBEB95/def2-TZVPP   | 50.1              | 52.2 | 73.1 | 75.3 | 99.2 |



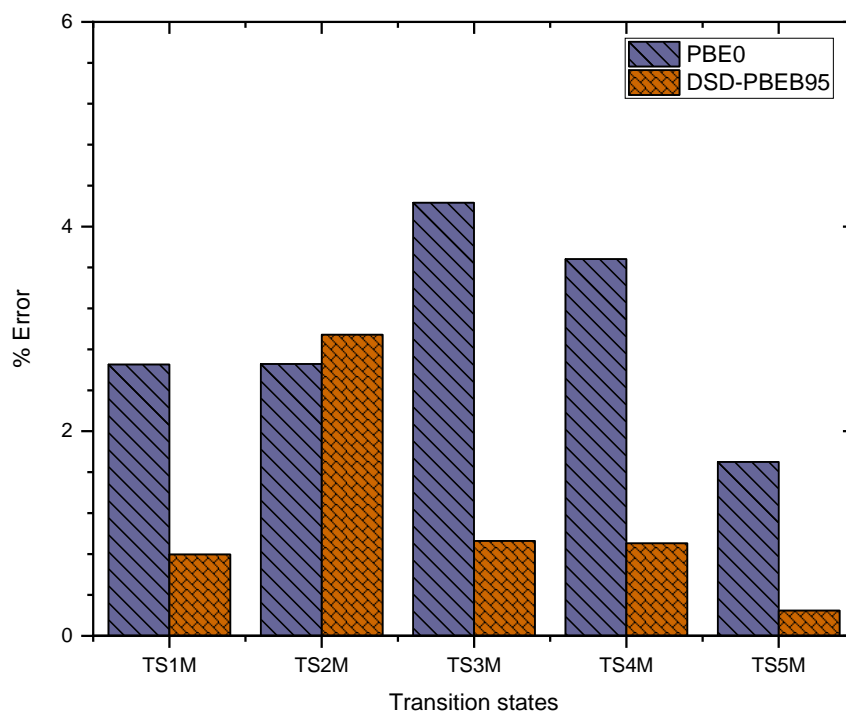

Figure S19: Comparison of the absolute percentage error (%) between DSD-PBEB95/def2-TZVPP and PBE0/def2-TZVPP for the transition states of TFA (Table S20). The percentage errors are calculated with reference to G3X-K method.

Table S21: Arrhenius expressions for the decomposition channels presented in Fig. 8 (article), and Fig. 12 (article), units are: s, cal, K, and mol.

| Transition states                                        | Arrhenius expression                               |
|----------------------------------------------------------|----------------------------------------------------|
| TS1M (C <sub>2</sub> F <sub>2</sub> O <sub>2</sub> + HF) | $k^a = 1.24 \times 10^{13} e^{-\frac{51131}{RT}}$  |
| TS2M (CF <sub>2</sub> + HF + CO <sub>2</sub> )           | $k^a = 6.62 \times 10^{14} e^{-\frac{54049}{RT}}$  |
| TS1M1 (CF <sub>2</sub> O + CO)                           | $k^a = 3.70 \times 10^{13} e^{-\frac{15613}{RT}}$  |
| TS1M2 (CF <sub>2</sub> + CO <sub>2</sub> )               | $k^a = 1.52 \times 10^{14} e^{-\frac{20642}{RT}}$  |
| TS1M3 (FCOOH + HF)                                       | $k^b = 8.92 \times 10^{-15} e^{-\frac{40736}{RT}}$ |
| TS1M4 (HF + CO <sub>2</sub> )                            | $k^a = 2.77 \times 10^{13} e^{-\frac{31302}{RT}}$  |

<sup>a</sup> the unit of the k is s<sup>-1</sup>

<sup>b</sup> the unit of the k is cm<sup>3</sup> molecule<sup>-1</sup> s<sup>-1</sup>

Table S22: Half lives of TFA (TS1M, TS2M), difluoroacetolactone (TS1M1, and TS1M2), and perfluoroformic acid (TS1M4) by assuming a first order decomposition reaction.

| Temperature | TS1M                   | TS2M                   | TS1M1                  | TS1M2                  | TS1M4                  |
|-------------|------------------------|------------------------|------------------------|------------------------|------------------------|
| (K)         | half life (s)          |
| 300         | $9.05 \times 10^{+23}$ | $2.08 \times 10^{+24}$ | $4.02 \times 10^{-03}$ | $4.51 \times 10^{+00}$ | $1.41 \times 10^{+09}$ |
| 400         | $4.91 \times 10^{+14}$ | $3.69 \times 10^{+14}$ | $6.49 \times 10^{-06}$ | $8.89 \times 10^{-04}$ | $3.20 \times 10^{+03}$ |
| 500         | $1.31 \times 10^{+09}$ | $4.88 \times 10^{+08}$ | $1.32 \times 10^{-07}$ | $5.10 \times 10^{-06}$ | $1.27 \times 10^{+00}$ |
| 600         | $2.49 \times 10^{+05}$ | $5.71 \times 10^{+04}$ | $9.67 \times 10^{-09}$ | $1.60 \times 10^{-07}$ | $6.79 \times 10^{-03}$ |
| 700         | $5.41 \times 10^{+02}$ | $8.70 \times 10^{+01}$ | $1.48 \times 10^{-09}$ | $1.34 \times 10^{-08}$ | $1.60 \times 10^{-04}$ |
| 800         | $5.43 \times 10^{+00}$ | $6.64 \times 10^{-01}$ | $3.59 \times 10^{-10}$ | $2.07 \times 10^{-09}$ | $9.52 \times 10^{-06}$ |
| 900         | $1.51 \times 10^{-01}$ | $1.49 \times 10^{-02}$ | $1.19 \times 10^{-10}$ | $4.84 \times 10^{-10}$ | $1.06 \times 10^{-06}$ |
| 1000        | $8.56 \times 10^{-03}$ | $7.10 \times 10^{-04}$ | $4.92 \times 10^{-11}$ | $1.51 \times 10^{-10}$ | $1.81 \times 10^{-07}$ |
| 1200        | $1.15 \times 10^{-04}$ | $7.31 \times 10^{-06}$ | $1.30 \times 10^{-11}$ | $2.61 \times 10^{-11}$ | $1.27 \times 10^{-08}$ |
| 1400        | $5.26 \times 10^{-06}$ | $2.76 \times 10^{-07}$ | $5.01 \times 10^{-12}$ | $7.46 \times 10^{-12}$ | $1.89 \times 10^{-09}$ |
| 1600        | $5.18 \times 10^{-07}$ | $2.36 \times 10^{-08}$ | $2.45 \times 10^{-12}$ | $2.91 \times 10^{-12}$ | $4.48 \times 10^{-10}$ |
| 1800        | $8.52 \times 10^{-08}$ | $3.46 \times 10^{-09}$ | $1.40 \times 10^{-12}$ | $1.40 \times 10^{-12}$ | $1.46 \times 10^{-10}$ |
| 2000        | $2.01 \times 10^{-08}$ | $7.44 \times 10^{-10}$ | $8.96 \times 10^{-13}$ | $7.76 \times 10^{-13}$ | $5.91 \times 10^{-11}$ |

## Input parameters for calculating Arrhenius equation

Table S23: Moments of inertia ( $\text{amu } \text{\AA}^2$ ) of PFOA and transition states presented in Fig. 3 (article) at M06-2X/6-31G(2df,p) level of theory.

| PFOA      | TSO1      | TSO2      | TSO3      | TSO4      | TSO5      |
|-----------|-----------|-----------|-----------|-----------|-----------|
| 1067.7519 | 1046.7990 | 1348.3833 | 1142.8377 | 1051.4440 | 1059.2800 |
| 3077.5722 | 3203.9260 | 2657.6037 | 3061.7572 | 3164.1531 | 3125.8619 |
| 3087.0123 | 3246.6330 | 2964.2908 | 3144.9687 | 3235.9781 | 3183.4073 |

Table S24: Moments of inertia ( $\text{amu } \text{\AA}^2$ ) of Perfluoro-3-Hexyl- $\alpha$ -lactone, C7-perfluorinated aldehyde, water, and transition states presented in Fig. 6 (article) at M06-2X/6-31G(2df,p) level of theory.

| Perfluoro-3-Hexyl- $\alpha$ -lactone | TS1O1     | TS1O2     | C7-perfluor-aldehyde | TS1O3     | H <sub>2</sub> O |
|--------------------------------------|-----------|-----------|----------------------|-----------|------------------|
| 943.4444                             | 958.5473  | 880.2531  | 924.5387             | 844.1324  | 0.6223           |
| 2903.3260                            | 2908.9023 | 3379.9748 | 2195.4573            | 2925.9218 | 1.1529           |
| 2977.0477                            | 2968.2873 | 3618.4516 | 2284.3431            | 3027.6094 | 1.7751           |

Table S25: Moments of inertia ( $\text{amu } \text{\AA}^2$ ) of iso-PFOA and transition states presented in Fig. S2 at M06-2X/6-31G(2df,p) level of theory.

| iso-PFOA  | TSO1a     | TSO3a     |
|-----------|-----------|-----------|
| 1187.4809 | 1162.6853 | 1290.7950 |
| 2868.0111 | 2919.6861 | 2783.2586 |
| 3046.7600 | 3077.3826 | 3149.1679 |

Table S26: Moments of inertia ( $\text{amu } \text{\AA}^2$ ) of Perfluoroheptanoic acid, Perfluoro-3-Pentyl- $\alpha$ -lactone, C6-perfluorinated aldehyde, and transition states presented in Fig. S7 at M06-2X/6-31G(2df,p) level of theory.

| Perfluoroheptanoic acid | TS71      | Perfluoro-3-Pentyl- $\alpha$ -lactone | TS171     | TS172     | C6-perfluor-aldehyde | TS173     |
|-------------------------|-----------|---------------------------------------|-----------|-----------|----------------------|-----------|
| 928.1958                | 920.8460  | 814.0983                              | 829.7240  | 710.6124  | 928.1958             | 738.5314  |
| 2183.6417               | 2292.4965 | 2101.4722                             | 2108.3860 | 2484.2529 | 2183.6417            | 1952.5680 |
| 2252.1857               | 2369.8054 | 2126.2089                             | 2115.7658 | 2666.2006 | 2252.1857            | 2069.6325 |

Table S27: Moments of inertia ( $\text{amu } \text{\AA}^2$ ) of Perfluorohexanoic acid, Perfluoro-3-Butyl- $\alpha$ -lactone, C5-perfluorinated aldehyde, and transition states presented in Fig. S8 at M06-2X/6-31G(2df,p) level of theory.

| Perfluorohexanoic acid | TS61      | Perfluoro-3-Butyl- $\alpha$ -lactone | TS161     | TS162     | C5-perfluor-aldehyde | TS163     |
|------------------------|-----------|--------------------------------------|-----------|-----------|----------------------|-----------|
| 787.8833               | 760.5855  | 656.3563                             | 657.8056  | 620.8723  | 621.5517             | 615.4466  |
| 1539.3858              | 1638.6320 | 1458.0615                            | 1461.8673 | 1592.1628 | 1010.5987            | 1313.7153 |
| 1550.3755              | 1690.6116 | 1550.7881                            | 1562.9094 | 1777.5774 | 1105.5279            | 1400.8420 |

Table S28: Moments of inertia ( $\text{amu } \text{\AA}^2$ ) of Perfluoropentanoic acid, Perfluoro-3-Propyl- $\alpha$ -lactone, C4-perfluorinated aldehyde, and transition states presented in Fig. S9 at M06-2X/6-31G(2df,p) level of theory.

| Perfluoropentanoic acid | TS51      | Perfluoro-3-Propyl- $\alpha$ -lactone | TS151     | TS152     | C4-perfluor-aldehyde | TS153    |
|-------------------------|-----------|---------------------------------------|-----------|-----------|----------------------|----------|
| 539.2549                | 561.0585  | 469.7882                              | 461.2358  | 501.5964  | 344.4996             | 506.8395 |
| 1166.7417               | 1181.6837 | 1022.1265                             | 1087.9100 | 1059.8475 | 808.9615             | 769.6775 |
| 1258.1485               | 1224.4244 | 1167.1474                             | 1125.2759 | 1216.2579 | 884.4997             | 888.0573 |

Table S29: Moments of inertia ( $\text{amu } \text{\AA}^2$ ) of Perfluorobutanoic acid, Perfluoro-3-Ethyl- $\alpha$ -lactone, C3-perfluorinated aldehyde, and transition states presented in Fig. S10 at M06-2X/6-31G(2df,p) level of theory.

| Perfluorobutanoic acid | TS41     | Perfluoro-3-Ethyl- $\alpha$ -lactone | TS141    | TS142    | C3-perfluor-aldehyde | TS143    |
|------------------------|----------|--------------------------------------|----------|----------|----------------------|----------|
| 452.6047               | 464.7400 | 372.2819                             | 374.5382 | 394.5556 | 245.7231             | 323.7817 |
| 635.0798               | 668.1176 | 555.6605                             | 561.5900 | 572.8367 | 425.2609             | 494.9196 |
| 726.7646               | 718.6269 | 689.5264                             | 675.8427 | 734.3221 | 492.5800             | 548.7975 |

Table S30: Moments of inertia ( $\text{amu } \text{\AA}^2$ ) of Pentafluoropropionic acid, Perfluoro-3-Methyl- $\alpha$ -lactone, perfluoroacetyl fluoride, and transition states TS1E, TS1E1, TS1E2, and TS1E3 at M06-2X/6-31G(2df,p) level of theory.

| Pentafluoropropionic acid | TS1E     | Perfluoro-3-Methyl- $\alpha$ -lactone | TS1E1    | TS1E2    | perfluoroacetyl fluoride | TS1E3    |
|---------------------------|----------|---------------------------------------|----------|----------|--------------------------|----------|
| 264.3090                  | 279.2783 | 188.0904                              | 199.1059 | 185.8845 | 130.2849                 | 184.1494 |
| 428.8612                  | 425.1791 | 363.6109                              | 355.6236 | 412.1597 | 200.0109                 | 276.2056 |
| 453.9933                  | 479.2018 | 410.2399                              | 396.7983 | 456.3799 | 242.3844                 | 288.7638 |

Table S31: Moments of inertia ( $\text{amu } \text{\AA}^2$ ) of PFNA and transition states presented in Fig. S16 at M06-2X/6-31G(2df,p) level of theory.

| PFNA      | TSN1      | TSN2      | TSN3      | TSN4      | TSN5      |
|-----------|-----------|-----------|-----------|-----------|-----------|
| 1219.2104 | 1281.7428 | 1222.8366 | 1278.1915 | 1212.5914 | 1212.7660 |
| 4103.6517 | 4225.7978 | 4236.2015 | 4219.6915 | 4488.8732 | 4179.5513 |
| 4182.3080 | 4364.2917 | 4274.5890 | 4331.1406 | 4637.7767 | 4264.9656 |

Table S32: Moments of inertia ( $\text{amu } \text{\AA}^2$ ) of trifluoroacetic acid (TFA) and transition states presented in Fig. 8 (article) at M06-2X/6-31G(2df,p) level of theory.

| TFA      | TS1M     | TS2M     | TS3M     | TS4M     | TS5M     |
|----------|----------|----------|----------|----------|----------|
| 129.7888 | 169.1218 | 156.2471 | 128.0567 | 123.4051 | 104.4252 |
| 201.6972 | 185.3823 | 227.1101 | 244.2496 | 213.9509 | 249.2848 |
| 242.3712 | 269.9239 | 301.8061 | 284.3486 | 257.9037 | 263.6763 |

Table S33: Moments of inertia ( $\text{amu } \text{\AA}^2$ ) of Difluoroacetolactone, carbonyl fluoride, perfluoro-formic acid, and transition states TS1M1, TS1M2, TS1M3, and TS1M4 at M06-2X/6-31G(2df,p) level of theory.

| Difluoroaceto-<br>lactone | TS1M1    | TS1M2    | carbonyl-<br>fluoride | TS1M3    | perfluoro-<br>formic acid | TS1M4   |
|---------------------------|----------|----------|-----------------------|----------|---------------------------|---------|
| 69.3763                   | 76.0858  | 74.9645  | 42.2453               | 86.0556  | 42.1273                   | 37.4962 |
| 165.7822                  | 168.7328 | 189.6020 | 42.5542               | 100.8976 | 43.7945                   | 56.0327 |
| 183.8265                  | 179.1693 | 196.9133 | 84.7996               | 103.4559 | 85.9218                   | 93.5289 |

Table S34: Vibrational frequencies ( $\text{cm}^{-1}$ ) of PFOA, and transition state TSO1 and TSO2 at M06-2X/6-31G(2df,p) level of theory

| PFOA   |         |         | TSO1   |         |         | TSO2   |         |         |
|--------|---------|---------|--------|---------|---------|--------|---------|---------|
| C1     | C2      | C3      | C4     | C5      | C6      | C7     | C8      | C9      |
| 42.79  | 388.34  | 1286.32 | 44.68  | 388.11  | 1303.97 | 9.16   | 377.87  | 1293.27 |
| 51.76  | 428.95  | 1292.95 | 52.59  | 440.75  | 1311.13 | 38.77  | 390.00  | 1313.67 |
| 58.78  | 472.31  | 1304.85 | 61.39  | 445.09  | 1326.87 | 53.19  | 445.95  | 1320.71 |
| 68.37  | 494.60  | 1324.04 | 68.03  | 484.61  | 1329.17 | 69.51  | 484.63  | 1332.25 |
| 79.91  | 511.52  | 1333.98 | 83.36  | 497.10  | 1334.55 | 78.50  | 499.47  | 1335.51 |
| 97.55  | 524.79  | 1341.17 | 110.44 | 509.56  | 1355.45 | 91.09  | 530.70  | 1354.99 |
| 111.04 | 551.24  | 1354.09 | 114.82 | 542.06  | 1367.49 | 122.98 | 554.23  | 1372.84 |
| 138.61 | 568.64  | 1364.49 | 138.71 | 551.30  | 1370.41 | 129.80 | 560.42  | 1376.56 |
| 145.77 | 602.37  | 1370.23 | 144.20 | 602.56  | 1415.89 | 144.19 | 600.92  | 1409.39 |
| 151.30 | 630.39  | 1373.25 | 150.62 | 641.26  | 1423.19 | 158.34 | 607.17  | 1411.58 |
| 151.96 | 637.06  | 1420.69 | 152.59 | 653.46  | 1518.37 | 176.49 | 655.18  | 1565.73 |
| 171.90 | 652.51  | 1444.56 | 176.49 | 672.71  | 1891.85 | 186.78 | 666.48  | 1891.66 |
| 190.92 | 660.47  | 1944.67 | 186.29 | 678.78  | 2649.14 | 197.89 | 678.34  | 2211.73 |
| 207.42 | 679.74  | 3816.97 | 198.38 | 686.16  |         | 219.63 | 688.39  |         |
| 228.44 | 683.00  |         | 210.41 | 741.08  |         | 232.14 | 721.06  |         |
| 246.49 | 721.60  |         | 230.98 | 778.45  |         | 250.32 | 740.55  |         |
| 255.38 | 778.75  |         | 258.35 | 803.29  |         | 259.99 | 772.92  |         |
| 275.46 | 800.63  |         | 265.27 | 923.66  |         | 268.82 | 783.22  |         |
| 279.35 | 925.95  |         | 276.90 | 981.02  |         | 280.86 | 915.52  |         |
| 289.85 | 989.12  |         | 286.72 | 997.51  |         | 295.20 | 989.06  |         |
| 305.09 | 1051.88 |         | 298.04 | 1051.08 |         | 308.89 | 1062.99 |         |
| 313.99 | 1113.17 |         | 303.19 | 1121.78 |         | 320.97 | 1069.73 |         |
| 318.44 | 1158.74 |         | 314.06 | 1178.07 |         | 323.88 | 1142.70 |         |
| 320.32 | 1189.24 |         | 317.54 | 1213.78 |         | 332.49 | 1192.71 |         |
| 332.45 | 1203.82 |         | 324.92 | 1251.47 |         | 342.11 | 1212.49 |         |
| 343.67 | 1227.91 |         | 328.63 | 1256.84 |         | 346.28 | 1217.83 |         |
| 368.56 | 1256.73 |         | 344.03 | 1275.71 |         | 349.66 | 1238.66 |         |
| 377.42 | 1265.41 |         | 367.28 | 1282.48 |         | 363.69 | 1269.23 |         |
| 384.43 | 1272.76 |         | 384.48 | 1294.54 |         | 373.32 | 1278.35 |         |
| up C2  | up C3   |         | up C5  | up C6   |         | up C8  | up C9   |         |

Table S35: Vibrational frequencies ( $\text{cm}^{-1}$ ) of transition states TSO3, TSO4, and TSO5 at M06-2X/6-31G(2df,p) level of theory

| TSO3   |         |         | TSO4   |         |         | TSO5   |         |         |
|--------|---------|---------|--------|---------|---------|--------|---------|---------|
| C1     | C2      | C3      | C4     | C5      | C6      | C7     | C8      | C9      |
| 22.58  | 385.27  | 1273.49 | 25.14  | 416.56  | 1294.06 | 33.02  | 440.41  | 1284.03 |
| 29.15  | 409.88  | 1287.65 | 39.81  | 450.16  | 1306.87 | 42.44  | 457.80  | 1294.16 |
| 46.92  | 458.90  | 1294.49 | 54.75  | 480.55  | 1320.51 | 60.73  | 480.19  | 1323.89 |
| 60.29  | 487.20  | 1326.05 | 68.45  | 494.08  | 1327.28 | 67.23  | 489.00  | 1334.28 |
| 67.05  | 499.69  | 1333.33 | 83.88  | 503.60  | 1332.59 | 68.89  | 502.59  | 1340.33 |
| 89.75  | 517.82  | 1350.06 | 96.16  | 511.41  | 1336.59 | 95.69  | 518.80  | 1346.50 |
| 106.19 | 551.41  | 1354.49 | 114.12 | 550.99  | 1356.71 | 113.12 | 550.96  | 1358.20 |
| 129.40 | 598.20  | 1364.01 | 130.30 | 577.62  | 1370.93 | 137.38 | 601.98  | 1364.77 |
| 137.65 | 604.53  | 1371.34 | 142.91 | 583.10  | 1382.98 | 143.04 | 637.63  | 1367.64 |
| 148.00 | 617.32  | 1376.13 | 147.89 | 602.98  | 1428.01 | 149.90 | 640.96  | 1420.82 |
| 153.39 | 628.52  | 1421.01 | 156.04 | 635.61  | 1555.93 | 152.55 | 662.64  | 1430.69 |
| 165.68 | 653.47  | 2027.31 | 169.26 | 655.00  | 1578.79 | 168.04 | 673.20  | 1594.33 |
| 177.08 | 661.47  | 2343.15 | 189.75 | 670.78  | 3868.21 | 189.04 | 674.68  | 3607.16 |
| 190.13 | 678.24  |         | 209.35 | 681.17  |         | 205.71 | 682.04  |         |
| 210.79 | 682.36  |         | 230.23 | 693.51  |         | 219.61 | 685.16  |         |
| 220.61 | 711.83  |         | 236.80 | 774.73  |         | 231.81 | 755.92  |         |
| 233.27 | 778.56  |         | 249.76 | 779.03  |         | 257.92 | 777.91  |         |
| 259.45 | 905.21  |         | 260.14 | 836.14  |         | 275.59 | 847.00  |         |
| 277.63 | 942.97  |         | 280.84 | 906.69  |         | 281.16 | 930.61  |         |
| 282.63 | 968.14  |         | 295.31 | 962.66  |         | 286.00 | 984.40  |         |
| 287.97 | 1020.56 |         | 304.28 | 1031.27 |         | 310.71 | 1038.74 |         |
| 303.71 | 1085.82 |         | 308.69 | 1080.07 |         | 313.22 | 1077.61 |         |
| 315.44 | 1134.81 |         | 316.67 | 1103.22 |         | 318.26 | 1134.81 |         |
| 318.81 | 1153.95 |         | 321.72 | 1141.21 |         | 325.12 | 1180.40 |         |
| 321.47 | 1185.82 |         | 327.09 | 1193.01 |         | 331.70 | 1215.22 |         |
| 332.47 | 1210.42 |         | 339.35 | 1220.38 |         | 340.88 | 1224.91 |         |
| 346.39 | 1232.45 |         | 357.84 | 1258.64 |         | 367.53 | 1256.48 |         |
| 369.04 | 1252.89 |         | 370.78 | 1281.13 |         | 383.79 | 1261.40 |         |
| 379.86 | 1264.61 |         | 386.02 | 1288.29 |         | 385.08 | 1270.31 |         |
| up C2  | up C3   |         | up C5  | up C6   |         | up C8  | up C9   |         |



Table S36: Vibrational frequencies ( $\text{cm}^{-1}$ ) of Perfluoro-3-Hexyl- $\alpha$ -lactone, and transition states TS1O1, and TS1O2 at M06-2X/6-31G(2df,p) level of theory

| Perfluoro-3-Hexyl- $\alpha$ -lactone |         |         | TS1O1  |         |         | TS1O2  |         |         |
|--------------------------------------|---------|---------|--------|---------|---------|--------|---------|---------|
| C1                                   | C2      | C3      | C4     | C5      | C6      | C7     | C8      | C9      |
| 32.45                                | 486.26  | 1336.57 | 34.91  | 461.83  | 1348.93 | 13.75  | 415.21  | 1336.51 |
| 47.66                                | 505.51  | 1355.43 | 47.45  | 486.20  | 1356.28 | 43.02  | 467.53  | 1343.98 |
| 56.33                                | 521.94  | 1366.51 | 58.51  | 501.60  | 1368.67 | 51.84  | 515.36  | 1375.38 |
| 72.78                                | 551.10  | 1369.63 | 70.25  | 515.51  | 1369.11 | 69.46  | 544.52  | 1393.24 |
| 85.72                                | 561.25  | 1371.32 | 85.11  | 550.38  | 1423.26 | 79.80  | 553.99  | 1399.05 |
| 111.53                               | 602.66  | 1386.12 | 110.41 | 555.67  | 1472.71 | 90.20  | 577.88  | 1426.10 |
| 123.44                               | 603.48  | 1423.40 | 121.20 | 602.13  | 2253.32 | 97.55  | 601.38  | 2342.14 |
| 134.64                               | 648.68  | 2119.40 | 135.35 | 635.41  |         | 116.64 | 612.19  |         |
| 147.15                               | 659.13  |         | 146.90 | 649.37  |         | 140.69 | 659.21  |         |
| 155.33                               | 678.36  |         | 153.13 | 650.72  |         | 157.02 | 660.76  |         |
| 169.40                               | 681.05  |         | 173.30 | 677.69  |         | 173.39 | 682.65  |         |
| 185.44                               | 712.45  |         | 188.06 | 682.14  |         | 190.91 | 697.90  |         |
| 208.16                               | 721.61  |         | 205.95 | 722.75  |         | 209.28 | 706.07  |         |
| 229.20                               | 778.76  |         | 228.87 | 778.22  |         | 215.42 | 774.58  |         |
| 237.55                               | 837.35  |         | 237.43 | 889.64  |         | 230.07 | 834.66  |         |
| 259.46                               | 919.74  |         | 256.95 | 955.46  |         | 235.47 | 887.12  |         |
| 278.67                               | 977.20  |         | 277.24 | 1023.25 |         | 246.74 | 974.95  |         |
| 287.40                               | 1050.11 |         | 280.39 | 1093.75 |         | 264.40 | 1076.04 |         |
| 298.32                               | 1119.80 |         | 291.31 | 1129.08 |         | 280.63 | 1195.72 |         |
| 313.55                               | 1175.46 |         | 309.21 | 1171.85 |         | 287.94 | 1201.65 |         |
| 315.71                               | 1197.10 |         | 313.45 | 1214.05 |         | 315.25 | 1222.15 |         |
| 323.06                               | 1220.38 |         | 315.54 | 1250.22 |         | 317.53 | 1252.22 |         |
| 328.42                               | 1259.17 |         | 324.98 | 1256.46 |         | 320.55 | 1260.10 |         |
| 338.54                               | 1263.40 |         | 338.66 | 1273.22 |         | 331.17 | 1272.67 |         |
| 366.27                               | 1277.64 |         | 366.08 | 1282.67 |         | 347.74 | 1283.44 |         |
| 373.86                               | 1286.18 |         | 375.79 | 1293.58 |         | 367.80 | 1296.93 |         |
| 384.29                               | 1299.72 |         | 384.41 | 1308.56 |         | 376.48 | 1313.52 |         |
| 389.30                               | 1326.07 |         | 386.53 | 1325.42 |         | 381.09 | 1322.81 |         |
| 446.63                               | 1333.94 |         | 433.51 | 1333.67 |         | 392.12 | 1327.63 |         |
| up C2                                | up C3   |         | up C5  | up C6   |         | up C8  | up C9   |         |

Table S37: Vibrational frequencies ( $\text{cm}^{-1}$ ) of C7-perfluorinated aldehyde, and transition states TS1O3, and water at M06-2X/6-31G(2df,p) level of theory

| C7-perfluoro-<br>aldehyde |         |         | TS1O3  |         |         | H <sub>2</sub> O |
|---------------------------|---------|---------|--------|---------|---------|------------------|
| C1                        | C2      | C3      | C4     | C5      | C6      | C7               |
| 47.75                     | 542.38  | 1423.70 | 21.00  | 460.80  | 1332.60 | 1658.61          |
| 60.15                     | 550.87  | 2011.43 | 40.25  | 492.90  | 1335.10 | 3884.24          |
| 67.33                     | 581.81  |         | 63.89  | 516.28  | 1341.53 | 3990.62          |
| 78.23                     | 602.65  |         | 74.47  | 523.83  | 1360.20 |                  |
| 87.80                     | 648.79  |         | 85.27  | 549.21  | 1383.80 |                  |
| 121.92                    | 652.87  |         | 105.05 | 572.25  | 1425.40 |                  |
| 132.99                    | 677.62  |         | 131.05 | 602.64  | 1435.88 |                  |
| 152.54                    | 681.28  |         | 153.22 | 625.64  | 1978.72 |                  |
| 156.58                    | 732.65  |         | 161.73 | 652.86  | 2129.49 |                  |
| 162.48                    | 779.00  |         | 185.88 | 665.92  | 3822.43 |                  |
| 187.00                    | 791.29  |         | 191.11 | 671.10  |         |                  |
| 206.41                    | 935.81  |         | 217.10 | 693.62  |         |                  |
| 233.81                    | 1004.43 |         | 243.53 | 697.23  |         |                  |
| 244.31                    | 1080.86 |         | 258.22 | 772.61  |         |                  |
| 264.03                    | 1140.32 |         | 283.63 | 827.26  |         |                  |
| 278.77                    | 1181.53 |         | 290.12 | 903.12  |         |                  |
| 287.51                    | 1220.52 |         | 294.62 | 961.97  |         |                  |
| 302.39                    | 1257.93 |         | 300.65 | 1012.22 |         |                  |
| 311.16                    | 1259.20 |         | 309.02 | 1105.49 |         |                  |
| 316.27                    | 1281.86 |         | 320.22 | 1123.06 |         |                  |
| 325.36                    | 1290.36 |         | 322.34 | 1178.16 |         |                  |
| 341.27                    | 1304.71 |         | 337.69 | 1195.35 |         |                  |
| 365.38                    | 1323.93 |         | 354.72 | 1228.63 |         |                  |
| 377.84                    | 1329.56 |         | 366.90 | 1248.72 |         |                  |
| 386.53                    | 1334.66 |         | 374.43 | 1269.19 |         |                  |
| 393.83                    | 1354.53 |         | 393.40 | 1277.66 |         |                  |
| 456.01                    | 1369.91 |         | 404.11 | 1292.54 |         |                  |
| 488.47                    | 1371.52 |         | 414.16 | 1306.23 |         |                  |
| 507.74                    | 1376.28 |         | 436.65 | 1325.46 |         |                  |
| up C2                     | up C3   |         | up C5  | up C6   |         |                  |

Table S38: Vibrational frequencies ( $\text{cm}^{-1}$ ) of iso-PFOA, and transition state TSO1a and TSO3a at M06-2X/6-31G(2df,p) level of theory

| PFOA   |         |         | TSO1   |         |         | TSO2   |         |         |
|--------|---------|---------|--------|---------|---------|--------|---------|---------|
| C1     | C2      | C3      | C4     | C5      | C6      | C7     | C8      | C9      |
| 34.20  | 393.13  | 1291.04 | 32.94  | 407.15  | 1302.08 | 34.66  | 395.35  | 1284.79 |
| 49.65  | 450.21  | 1291.94 | 51.89  | 444.31  | 1308.42 | 45.68  | 434.93  | 1296.01 |
| 62.94  | 485.80  | 1314.33 | 63.83  | 477.32  | 1320.89 | 49.71  | 455.88  | 1302.61 |
| 71.92  | 504.48  | 1324.30 | 81.75  | 506.02  | 1326.24 | 63.35  | 523.14  | 1337.11 |
| 75.37  | 535.69  | 1326.88 | 95.11  | 519.09  | 1335.38 | 66.15  | 529.10  | 1341.64 |
| 93.76  | 551.44  | 1330.99 | 108.55 | 550.65  | 1350.96 | 81.28  | 544.75  | 1343.14 |
| 112.44 | 560.92  | 1335.03 | 115.06 | 566.11  | 1353.45 | 90.13  | 552.46  | 1376.23 |
| 126.39 | 564.10  | 1356.91 | 121.48 | 593.34  | 1354.67 | 106.64 | 590.43  | 1387.85 |
| 137.79 | 603.35  | 1369.83 | 138.91 | 604.18  | 1363.71 | 125.13 | 601.23  | 1426.50 |
| 151.51 | 621.37  | 1381.92 | 148.28 | 632.00  | 1436.61 | 151.07 | 615.86  | 1435.53 |
| 157.63 | 641.53  | 1422.71 | 163.02 | 645.11  | 1454.35 | 159.86 | 633.11  | 1537.27 |
| 171.55 | 648.32  | 1428.45 | 168.31 | 668.29  | 1864.88 | 168.77 | 655.11  | 1795.70 |
| 199.07 | 670.87  | 1945.16 | 185.24 | 680.63  | 2272.57 | 197.01 | 685.98  | 2219.54 |
| 203.73 | 682.29  | 3813.61 | 195.99 | 709.79  |         | 206.46 | 711.70  |         |
| 219.51 | 699.75  |         | 206.90 | 748.83  |         | 213.27 | 724.51  |         |
| 235.99 | 725.26  |         | 217.56 | 776.14  |         | 235.13 | 756.20  |         |
| 269.04 | 778.98  |         | 254.54 | 797.96  |         | 248.00 | 769.80  |         |
| 275.16 | 792.00  |         | 283.71 | 896.59  |         | 259.22 | 786.14  |         |
| 284.98 | 903.74  |         | 289.03 | 992.13  |         | 289.22 | 881.87  |         |
| 292.34 | 981.46  |         | 306.76 | 1063.60 |         | 295.59 | 944.22  |         |
| 303.44 | 1068.15 |         | 314.36 | 1072.16 |         | 297.62 | 1058.78 |         |
| 316.40 | 1081.24 |         | 325.60 | 1107.46 |         | 306.28 | 1080.70 |         |
| 317.48 | 1150.68 |         | 329.81 | 1166.15 |         | 322.36 | 1148.60 |         |
| 326.45 | 1190.07 |         | 335.04 | 1209.49 |         | 338.36 | 1194.24 |         |
| 336.71 | 1206.84 |         | 352.64 | 1243.29 |         | 343.79 | 1213.36 |         |
| 362.36 | 1240.20 |         | 366.75 | 1265.32 |         | 351.06 | 1243.26 |         |
| 369.31 | 1259.52 |         | 371.47 | 1279.77 |         | 354.25 | 1257.63 |         |
| 376.22 | 1266.62 |         | 374.93 | 1288.18 |         | 375.87 | 1268.91 |         |
| 384.62 | 1273.19 |         | 395.57 | 1295.27 |         | 383.96 | 1270.63 |         |
| up C2  | up C3   |         | up C5  | up C6   |         | up C8  | up C9   |         |

Table S39: Vibrational frequencies ( $\text{cm}^{-1}$ ) of Perfluoroheptanoic acid, Perfluoro-3-Pentyl- $\alpha$ -lactone, and transition state TS71 at M06-2X/6-31G(2df,p) level of theory

| Perfluoroheptanoic acid |         |         | Perfluoro-3-Pentyl- $\alpha$ -lactone |         | TS71   |         |         |
|-------------------------|---------|---------|---------------------------------------|---------|--------|---------|---------|
| C1                      | C2      | C3      | C4                                    | C5      | C6     | C7      | C8      |
| 46.44                   | 525.87  | 1374.44 | 38.74                                 | 602.84  | 52.49  | 504.99  | 1420.58 |
| 52.98                   | 551.68  | 1423.00 | 58.52                                 | 604.07  | 60.45  | 538.49  | 1518.52 |
| 70.22                   | 573.95  | 1444.51 | 72.09                                 | 659.40  | 73.30  | 553.87  | 1891.90 |
| 75.15                   | 602.29  | 1944.74 | 78.40                                 | 663.84  | 77.53  | 602.52  | 2648.27 |
| 89.91                   | 633.25  | 3813.97 | 115.10                                | 681.56  | 105.98 | 650.42  |         |
| 116.92                  | 640.50  |         | 125.34                                | 711.91  | 117.92 | 656.84  |         |
| 132.49                  | 653.33  |         | 129.47                                | 721.02  | 134.43 | 678.87  |         |
| 141.25                  | 673.51  |         | 154.49                                | 778.84  | 148.52 | 684.79  |         |
| 152.74                  | 682.04  |         | 166.89                                | 837.83  | 152.61 | 740.84  |         |
| 167.91                  | 721.30  |         | 182.22                                | 927.52  | 168.65 | 778.74  |         |
| 190.63                  | 778.83  |         | 214.40                                | 998.32  | 185.25 | 803.84  |         |
| 208.65                  | 800.24  |         | 228.59                                | 1084.04 | 198.80 | 932.28  |         |
| 235.54                  | 937.62  |         | 247.13                                | 1162.62 | 216.03 | 992.50  |         |
| 246.53                  | 1010.04 |         | 267.05                                | 1197.56 | 241.28 | 1001.28 |         |
| 262.73                  | 1082.58 |         | 283.49                                | 1217.63 | 264.48 | 1087.49 |         |
| 278.01                  | 1142.95 |         | 292.79                                | 1261.79 | 268.25 | 1166.32 |         |
| 288.20                  | 1186.59 |         | 312.71                                | 1273.40 | 280.06 | 1209.47 |         |
| 303.97                  | 1201.96 |         | 318.97                                | 1282.18 | 300.82 | 1252.28 |         |
| 312.85                  | 1231.15 |         | 326.86                                | 1295.79 | 304.84 | 1270.42 |         |
| 315.19                  | 1256.70 |         | 336.59                                | 1323.53 | 315.53 | 1283.71 |         |
| 323.26                  | 1270.89 |         | 361.28                                | 1332.62 | 319.06 | 1294.61 |         |
| 341.61                  | 1281.59 |         | 375.81                                | 1342.19 | 325.72 | 1297.97 |         |
| 364.91                  | 1291.60 |         | 384.78                                | 1362.68 | 338.13 | 1311.77 |         |
| 379.01                  | 1301.29 |         | 399.02                                | 1369.02 | 367.08 | 1323.45 |         |
| 386.12                  | 1326.38 |         | 466.34                                | 1373.68 | 383.44 | 1332.76 |         |
| 390.70                  | 1332.86 |         | 499.76                                | 1386.60 | 397.83 | 1335.40 |         |
| 444.60                  | 1343.84 |         | 520.32                                | 1421.55 | 443.36 | 1362.81 |         |
| 486.45                  | 1357.59 |         | 549.04                                | 2119.63 | 461.66 | 1375.41 |         |
| 506.64                  | 1370.49 |         | 562.65                                |         | 494.16 | 1415.44 |         |
| up C2                   | up C3   |         | up C5                                 |         | up C7  | up C8   |         |

Table S40: Vibrational frequencies ( $\text{cm}^{-1}$ ) of C6-perfluorinated aldehyde, and transition states TS171, TS172, and TS173 at M06-2X/6-31G(2df,p) level of theory

| C6-perfluorinated<br>aldehyde |         | TS171  |         | TS172  |         | TS173  |         |
|-------------------------------|---------|--------|---------|--------|---------|--------|---------|
| C1                            | C2      | C3     | C4      | C5     | C6      | C7     | C8      |
| 52.40                         | 664.46  | 42.30  | 554.33  | 38.25  | 572.62  | 38.39  | 564.36  |
| 56.30                         | 682.19  | 59.19  | 603.49  | 40.63  | 606.94  | 58.00  | 599.24  |
| 75.89                         | 730.52  | 75.39  | 635.35  | 52.11  | 626.79  | 64.45  | 628.72  |
| 83.21                         | 777.94  | 81.92  | 650.80  | 68.05  | 659.98  | 84.96  | 662.68  |
| 121.67                        | 791.89  | 112.18 | 666.16  | 78.70  | 673.48  | 102.47 | 669.08  |
| 129.23                        | 950.19  | 124.50 | 681.48  | 98.36  | 695.24  | 139.99 | 677.20  |
| 156.24                        | 1032.42 | 133.61 | 721.99  | 117.15 | 706.19  | 150.08 | 697.39  |
| 158.44                        | 1115.70 | 155.48 | 778.66  | 145.25 | 770.68  | 184.71 | 775.57  |
| 182.38                        | 1176.21 | 168.74 | 892.31  | 168.98 | 838.76  | 192.51 | 828.60  |
| 215.86                        | 1215.22 | 184.54 | 972.77  | 187.38 | 902.79  | 241.83 | 919.60  |
| 232.16                        | 1259.11 | 213.24 | 1052.51 | 202.71 | 987.42  | 257.44 | 981.29  |
| 254.91                        | 1274.52 | 230.02 | 1117.12 | 221.84 | 1174.79 | 268.37 | 1059.26 |
| 268.48                        | 1290.18 | 248.43 | 1156.65 | 227.12 | 1199.96 | 285.27 | 1114.71 |
| 282.59                        | 1302.18 | 266.09 | 1210.45 | 241.94 | 1227.50 | 291.13 | 1142.28 |
| 300.04                        | 1320.20 | 279.81 | 1250.54 | 250.31 | 1254.55 | 303.83 | 1198.01 |
| 307.42                        | 1330.15 | 283.66 | 1267.58 | 273.65 | 1263.65 | 310.72 | 1230.40 |
| 320.17                        | 1335.84 | 306.13 | 1276.50 | 282.37 | 1276.78 | 324.93 | 1252.24 |
| 334.85                        | 1361.04 | 313.66 | 1291.86 | 297.28 | 1300.94 | 338.90 | 1274.64 |
| 362.96                        | 1374.66 | 318.00 | 1310.74 | 314.67 | 1308.27 | 343.38 | 1295.43 |
| 376.46                        | 1376.59 | 335.30 | 1321.38 | 315.69 | 1327.08 | 368.68 | 1303.18 |
| 386.11                        | 1424.45 | 361.58 | 1331.27 | 336.56 | 1334.67 | 377.01 | 1313.41 |
| 409.75                        | 2011.77 | 379.58 | 1353.71 | 362.73 | 1340.98 | 393.60 | 1330.55 |
| 473.24                        |         | 385.03 | 1362.94 | 376.14 | 1349.25 | 406.78 | 1343.65 |
| 501.68                        |         | 394.00 | 1374.07 | 380.11 | 1380.47 | 417.43 | 1347.79 |
| 540.40                        |         | 445.22 | 1421.19 | 398.50 | 1395.47 | 449.19 | 1382.58 |
| 550.96                        |         | 472.51 | 1474.16 | 427.35 | 1436.46 | 484.81 | 1401.05 |
| 581.04                        |         | 498.09 | 2252.96 | 508.51 | 2341.91 | 513.29 | 1421.76 |
| 603.03                        |         | 512.06 |         | 538.40 |         | 517.17 | 1978.48 |
| 652.15                        |         | 551.15 |         | 552.13 |         | 555.56 | 2133.87 |
| up C2                         |         | up C4  |         | up C6  |         | up C8  | 3823.30 |

Table S41: Vibrational frequencies ( $\text{cm}^{-1}$ ) of Perfluorohexanoic acid, Perfluoro-3-Butyl- $\alpha$ -lactone, and transition states TS61, and TS161 at M06-2X/6-31G(2df,p) level of theory

| Perfluorohexanoic acid |         | Perfluoro-3-Butyl- $\alpha$ -lactone |         | TS61   |         | TS161  |         |
|------------------------|---------|--------------------------------------|---------|--------|---------|--------|---------|
| C1                     | C2      | C3                                   | C4      | C5     | C6      | C7     | C8      |
| 41.38                  | 641.50  | 25.09                                | 720.61  | 36.20  | 674.63  | 33.52  | 720.63  |
| 54.80                  | 663.59  | 55.91                                | 779.81  | 57.46  | 682.10  | 53.54  | 779.11  |
| 69.99                  | 680.20  | 76.55                                | 837.87  | 70.89  | 739.45  | 74.89  | 897.83  |
| 76.50                  | 720.33  | 111.01                               | 937.15  | 99.07  | 778.18  | 105.49 | 998.20  |
| 118.95                 | 779.38  | 119.06                               | 1032.14 | 118.41 | 805.37  | 118.90 | 1093.29 |
| 121.18                 | 800.23  | 134.93                               | 1136.29 | 130.07 | 944.40  | 136.85 | 1138.57 |
| 145.25                 | 952.74  | 171.32                               | 1198.55 | 151.09 | 997.21  | 169.29 | 1208.56 |
| 161.66                 | 1037.82 | 177.63                               | 1215.43 | 161.57 | 1034.70 | 181.73 | 1258.00 |
| 184.99                 | 1119.10 | 214.93                               | 1269.45 | 185.67 | 1139.20 | 214.69 | 1267.06 |
| 217.85                 | 1183.02 | 233.60                               | 1276.61 | 196.56 | 1209.40 | 233.28 | 1288.09 |
| 234.72                 | 1199.39 | 241.89                               | 1291.81 | 218.57 | 1262.41 | 241.97 | 1304.67 |
| 248.45                 | 1226.58 | 276.79                               | 1319.68 | 239.34 | 1271.87 | 272.11 | 1329.67 |
| 268.74                 | 1270.98 | 296.43                               | 1332.24 | 264.26 | 1289.69 | 284.56 | 1331.99 |
| 280.63                 | 1273.71 | 310.24                               | 1348.49 | 270.42 | 1302.45 | 300.99 | 1354.07 |
| 303.87                 | 1289.22 | 321.26                               | 1371.16 | 295.62 | 1307.77 | 313.95 | 1373.56 |
| 308.34                 | 1303.86 | 327.35                               | 1374.34 | 305.54 | 1319.80 | 323.43 | 1422.05 |
| 319.94                 | 1320.41 | 360.43                               | 1387.34 | 309.63 | 1333.31 | 363.56 | 1473.86 |
| 333.01                 | 1329.70 | 373.62                               | 1422.76 | 322.93 | 1344.90 | 370.84 | 2253.15 |
| 361.51                 | 1349.38 | 382.10                               | 2119.97 | 328.82 | 1375.03 | 383.05 |         |
| 376.09                 | 1364.88 | 417.73                               |         | 362.84 | 1416.25 | 408.46 |         |
| 387.29                 | 1377.97 | 488.19                               |         | 379.58 | 1422.45 | 455.20 |         |
| 402.13                 | 1423.09 | 517.79                               |         | 413.16 | 1518.48 | 486.50 |         |
| 463.66                 | 1444.97 | 551.48                               |         | 443.63 | 1891.48 | 508.44 |         |
| 500.62                 | 1944.30 | 562.90                               |         | 483.47 | 2644.56 | 545.96 |         |
| 525.11                 | 3816.57 | 589.05                               |         | 498.40 |         | 560.29 |         |
| 551.50                 |         | 619.22                               |         | 537.99 |         | 601.77 |         |
| 572.03                 |         | 661.78                               |         | 552.34 |         | 636.59 |         |
| 603.05                 |         | 677.44                               |         | 604.10 |         | 658.48 |         |
| 634.21                 |         | 711.34                               |         | 650.66 |         | 678.20 |         |
| up C2                  |         | up C4                                |         | up C6  |         | up C8  |         |

Table S42: Vibrational frequencies ( $\text{cm}^{-1}$ ) of C5-perfluorinated aldehyde, and transition states TS162, and TS163 at M06-2X/6-31G(2df,p) level of theory

| C5-perfluorinated<br>aldehyde |         | TS162  |         | TS163  |         |
|-------------------------------|---------|--------|---------|--------|---------|
| C1                            | C2      | C3     | C4      | C5     | C6      |
| 39.23                         | 1074.51 | 44.52  | 696.81  | 24.95  | 697.43  |
| 59.44                         | 1164.54 | 55.70  | 774.72  | 65.44  | 771.69  |
| 85.96                         | 1211.77 | 61.60  | 842.81  | 85.05  | 833.71  |
| 107.28                        | 1270.31 | 93.02  | 938.24  | 115.33 | 937.20  |
| 138.32                        | 1278.67 | 94.69  | 1079.08 | 140.38 | 1001.69 |
| 156.97                        | 1300.21 | 127.60 | 1201.65 | 163.82 | 1108.27 |
| 176.26                        | 1320.00 | 169.35 | 1224.15 | 185.29 | 1121.71 |
| 218.33                        | 1332.03 | 176.84 | 1256.04 | 221.09 | 1197.17 |
| 242.53                        | 1341.43 | 198.17 | 1266.05 | 245.92 | 1236.19 |
| 248.74                        | 1374.85 | 223.98 | 1293.42 | 259.35 | 1260.89 |
| 277.79                        | 1378.06 | 225.83 | 1318.82 | 288.34 | 1280.43 |
| 295.78                        | 1419.93 | 247.05 | 1329.57 | 298.93 | 1301.32 |
| 309.70                        | 2011.32 | 259.62 | 1330.67 | 310.48 | 1329.46 |
| 326.96                        |         | 282.31 | 1341.35 | 319.88 | 1335.79 |
| 358.88                        |         | 306.24 | 1370.68 | 330.22 | 1339.31 |
| 376.44                        |         | 316.62 | 1396.88 | 363.41 | 1364.12 |
| 382.06                        |         | 323.31 | 1431.25 | 373.83 | 1428.00 |
| 432.05                        |         | 346.84 | 2342.58 | 387.17 | 1430.83 |
| 491.43                        |         | 374.32 |         | 414.26 | 1976.98 |
| 533.77                        |         | 385.19 |         | 441.29 | 2136.98 |
| 556.33                        |         | 398.93 |         | 465.34 | 3822.10 |
| 570.79                        |         | 465.11 |         | 504.84 |         |
| 613.59                        |         | 529.47 |         | 515.34 |         |
| 656.13                        |         | 548.47 |         | 550.30 |         |
| 678.02                        |         | 579.95 |         | 578.38 |         |
| 728.73                        |         | 607.44 |         | 604.70 |         |
| 777.40                        |         | 659.46 |         | 635.36 |         |
| 792.81                        |         | 670.41 |         | 669.14 |         |
| 969.21                        |         | 676.12 |         | 674.24 |         |
| up C2                         |         | up C4  |         | up C6  |         |

Table S43: Vibrational frequencies ( $\text{cm}^{-1}$ ) of Perfluoropentanoic acid, Perfluoro-3-Propyl- $\alpha$ -lactone, and transition states TS51, and TS151 at M06-2X/6-31G(2df,p) level of theory

| Perfluoropentanoic acid |         | Perfluoro-3-Propyl- $\alpha$ -lactone |         | TS51   |         | TS151   |         |
|-------------------------|---------|---------------------------------------|---------|--------|---------|---------|---------|
| C1                      | C2      | C3                                    | C4      | C5     | C6      | C7      | C8      |
| 34.77                   | 923.17  | 20.41                                 | 1217.33 | 36.13  | 984.34  | 37.24   | 1252.36 |
| 51.91                   | 1078.26 | 42.79                                 | 1271.18 | 61.83  | 1114.80 | 45.50   | 1278.09 |
| 68.64                   | 1194.34 | 75.49                                 | 1281.64 | 69.90  | 1210.67 | 67.03   | 1298.69 |
| 90.78                   | 1201.38 | 95.87                                 | 1309.31 | 105.28 | 1259.21 | 120.21  | 1321.31 |
| 122.77                  | 1242.82 | 156.89                                | 1330.98 | 138.14 | 1272.39 | 123.84  | 1333.28 |
| 149.74                  | 1273.74 | 197.40                                | 1339.83 | 156.45 | 1296.89 | 184.38  | 1389.19 |
| 197.34                  | 1282.07 | 223.30                                | 1366.28 | 172.42 | 1299.02 | 211.64  | 1433.94 |
| 228.77                  | 1301.31 | 236.14                                | 1392.79 | 208.89 | 1325.85 | 240.50  | 1478.36 |
| 237.25                  | 1303.15 | 236.81                                | 1442.26 | 243.49 | 1339.36 | 247.22  | 2260.86 |
| 248.70                  | 1336.85 | 287.77                                | 2118.17 | 246.45 | 1384.26 | 290.03  |         |
| 272.08                  | 1339.70 | 300.22                                |         | 256.47 | 1406.53 | 293.54  |         |
| 296.24                  | 1384.13 | 329.31                                |         | 280.78 | 1433.44 | 321.61  |         |
| 296.39                  | 1434.94 | 350.13                                |         | 297.44 | 1502.45 | 339.59  |         |
| 332.83                  | 1448.49 | 361.21                                |         | 325.30 | 1891.83 | 366.27  |         |
| 353.63                  | 1941.76 | 386.04                                |         | 337.82 | 2629.38 | 381.39  |         |
| 384.61                  | 3814.41 | 445.64                                |         | 351.26 |         | 414.62  |         |
| 388.87                  |         | 527.30                                |         | 380.38 |         | 469.65  |         |
| 420.23                  |         | 535.69                                |         | 392.85 |         | 518.99  |         |
| 509.10                  |         | 550.82                                |         | 422.55 |         | 543.51  |         |
| 536.34                  |         | 612.25                                |         | 496.87 |         | 552.73  |         |
| 542.76                  |         | 627.42                                |         | 549.36 |         | 602.25  |         |
| 556.76                  |         | 672.20                                |         | 590.30 |         | 627.71  |         |
| 607.95                  |         | 712.08                                |         | 602.18 |         | 679.34  |         |
| 619.37                  |         | 731.33                                |         | 633.78 |         | 714.09  |         |
| 647.92                  |         | 775.67                                |         | 691.27 |         | 775.35  |         |
| 688.26                  |         | 826.66                                |         | 758.99 |         | 919.64  |         |
| 718.80                  |         | 935.80                                |         | 772.24 |         | 1025.13 |         |
| 775.08                  |         | 1114.98                               |         | 806.46 |         | 1116.08 |         |
| 793.19                  |         | 1193.43                               |         | 942.16 |         | 1202.25 |         |
| up C2                   |         | up C4                                 |         | up C6  |         | up C8   |         |



Table S44: Vibrational frequencies ( $\text{cm}^{-1}$ ) of C4-perfluorinated aldehyde, and transition states TS152, and TS153 at M06-2X/6-31G(2df,p) level of theory

| C4-perfluorinated<br>aldehyde |         | TS152   |         | TS153   |         |
|-------------------------------|---------|---------|---------|---------|---------|
| C1                            | C2      | C3      | C4      | C5      | C6      |
| 21.47                         | 1367.45 | 29.14   | 1258.45 | 50.28   | 1167.32 |
| 51.01                         | 1396.00 | 57.68   | 1281.36 | 72.22   | 1240.59 |
| 92.25                         | 1431.89 | 69.72   | 1313.81 | 120.20  | 1284.03 |
| 124.32                        | 2008.80 | 75.83   | 1329.43 | 158.08  | 1296.94 |
| 198.69                        |         | 143.18  | 1331.54 | 182.10  | 1311.64 |
| 201.84                        |         | 171.80  | 1342.50 | 234.14  | 1329.32 |
| 227.70                        |         | 194.93  | 1391.40 | 257.52  | 1358.07 |
| 251.08                        |         | 216.80  | 1434.59 | 288.95  | 1391.32 |
| 287.52                        |         | 235.82  | 2341.72 | 292.25  | 1429.29 |
| 310.13                        |         | 240.82  |         | 319.58  | 1981.03 |
| 335.33                        |         | 277.55  |         | 331.39  | 2134.10 |
| 378.54                        |         | 294.83  |         | 351.88  | 3825.59 |
| 383.12                        |         | 318.73  |         | 369.01  |         |
| 423.14                        |         | 346.43  |         | 387.68  |         |
| 512.61                        |         | 363.36  |         | 414.59  |         |
| 547.94                        |         | 391.91  |         | 456.82  |         |
| 606.13                        |         | 408.34  |         | 497.40  |         |
| 619.22                        |         | 515.15  |         | 514.31  |         |
| 707.37                        |         | 549.75  |         | 554.13  |         |
| 736.77                        |         | 574.29  |         | 571.24  |         |
| 784.40                        |         | 619.20  |         | 599.01  |         |
| 794.36                        |         | 660.69  |         | 650.04  |         |
| 946.08                        |         | 679.61  |         | 669.76  |         |
| 1173.25                       |         | 698.36  |         | 682.23  |         |
| 1213.70                       |         | 768.58  |         | 772.71  |         |
| 1255.47                       |         | 848.58  |         | 840.11  |         |
| 1295.44                       |         | 964.66  |         | 957.15  |         |
| 1310.12                       |         | 1197.37 |         | 1046.47 |         |
| 1334.19                       |         | 1216.21 |         | 1116.46 |         |
| up C2                         |         | up C4   |         | up C6   |         |

Table S45: Vibrational frequencies ( $\text{cm}^{-1}$ ) of Perfluorobutanoic acid ( $\text{C}_3\text{F}_7\text{COOH}$ ), Perfluoro-3-Ethyl- $\alpha$ -lactone ( $\text{C}_3\text{F}_6\text{CO}_2$ ), C3-perfluorinated aldehyde ( $\text{C}_3\text{F}_6\text{O}$ ) and transition states TS41, TS141, TS142, and TS143 at M06-2X/6-31G(2df,p) level of theory

| $\text{C}_3\text{F}_7\text{COOH}$ |         | $\text{C}_3\text{F}_6\text{CO}_2$ | TS41    |         | TS141   | TS142   | $\text{C}_3\text{F}_6\text{O}$ | TS143   |
|-----------------------------------|---------|-----------------------------------|---------|---------|---------|---------|--------------------------------|---------|
| C1                                | C2      | C3                                | C4      | C5      | C6      | C7      | C8                             | C9      |
| 52.29                             | 1313.77 | 33.16                             | 15.37   | 1348.74 | 50.44   | 49.19   | 43.12                          | 75.54   |
| 64.60                             | 1337.15 | 77.26                             | 86.15   | 1406.75 | 78.55   | 61.67   | 82.80                          | 92.73   |
| 87.04                             | 1355.18 | 123.49                            | 105.20  | 1432.53 | 123.02  | 75.28   | 148.64                         | 182.58  |
| 131.38                            | 1418.55 | 164.86                            | 148.31  | 1507.57 | 165.26  | 163.57  | 205.13                         | 214.64  |
| 179.09                            | 1436.56 | 217.70                            | 181.49  | 1893.42 | 217.39  | 198.58  | 234.95                         | 223.44  |
| 219.03                            | 1969.14 | 245.80                            | 209.59  | 2640.53 | 245.47  | 216.84  | 268.13                         | 263.30  |
| 246.03                            | 3838.57 | 273.57                            | 218.21  |         | 269.57  | 248.70  | 337.61                         | 314.19  |
| 268.96                            |         | 326.79                            | 250.52  |         | 299.96  | 269.52  | 362.18                         | 327.00  |
| 296.04                            |         | 330.02                            | 271.92  |         | 329.92  | 293.54  | 424.59                         | 354.25  |
| 321.75                            |         | 363.35                            | 296.22  |         | 355.76  | 348.19  | 425.57                         | 379.85  |
| 345.98                            |         | 393.45                            | 331.58  |         | 395.21  | 382.73  | 550.11                         | 426.84  |
| 380.56                            |         | 462.77                            | 347.79  |         | 427.94  | 384.71  | 598.52                         | 472.62  |
| 392.87                            |         | 521.86                            | 385.54  |         | 494.99  | 448.46  | 677.71                         | 523.62  |
| 458.84                            |         | 574.37                            | 415.30  |         | 549.88  | 549.28  | 730.90                         | 555.00  |
| 519.28                            |         | 601.32                            | 439.86  |         | 559.45  | 598.41  | 785.37                         | 576.44  |
| 539.22                            |         | 670.20                            | 555.93  |         | 610.94  | 620.43  | 810.97                         | 614.27  |
| 558.03                            |         | 697.19                            | 566.16  |         | 671.40  | 674.33  | 1061.78                        | 646.45  |
| 596.76                            |         | 721.64                            | 632.80  |         | 682.76  | 696.33  | 1213.55                        | 667.22  |
| 607.56                            |         | 783.63                            | 640.68  |         | 783.65  | 764.04  | 1267.03                        | 769.70  |
| 665.77                            |         | 835.28                            | 750.93  |         | 977.58  | 863.43  | 1324.03                        | 860.86  |
| 724.74                            |         | 1027.49                           | 776.08  |         | 1056.83 | 1102.67 | 1334.60                        | 998.97  |
| 777.26                            |         | 1165.77                           | 815.85  |         | 1171.71 | 1214.49 | 1381.06                        | 1127.77 |
| 792.69                            |         | 1209.67                           | 996.10  |         | 1276.84 | 1268.50 | 1445.90                        | 1132.52 |
| 1005.86                           |         | 1275.37                           | 1038.28 |         | 1290.53 | 1313.01 | 2006.62                        | 1264.08 |
| 1131.82                           |         | 1300.95                           | 1170.66 |         | 1318.85 | 1322.23 |                                | 1286.00 |
| 1199.14                           |         | 1328.43                           | 1272.07 |         | 1339.34 | 1335.26 |                                | 1322.84 |
| 1259.30                           |         | 1361.58                           | 1284.36 |         | 1436.85 | 1344.13 |                                | 1329.55 |
| 1274.09                           |         | 1383.63                           | 1299.25 |         | 1478.24 | 1420.99 |                                | 1424.59 |
| 1299.82                           |         | 1436.01                           | 1332.08 |         | 2259.65 | 2335.05 |                                | 1456.13 |
| up C2                             |         | 2120.64                           | up C5   |         |         |         |                                | 1987.29 |
|                                   |         |                                   |         |         |         |         |                                | 2172.89 |
|                                   |         |                                   |         |         |         |         |                                | 3816.65 |

Table S46: Vibrational frequencies ( $\text{cm}^{-1}$ ) of Pentafluoropropionic acid ( $\text{C}_2\text{F}_5\text{COOH}$ ), Perfluoro-3-Methyl- $\alpha$ -lactone ( $\text{C}_2\text{F}_4\text{CO}_2$ ), perfluoroacetyl fluoride ( $\text{C}_2\text{F}_4\text{O}$ ) and transition states TS1E, TS1E1, TS1E2, and TS1E3 at M06-2X/6-31G(2df,p) level of theory

| $\text{C}_2\text{F}_5\text{COOH}$ | $\text{C}_2\text{F}_4\text{CO}_2$ | TS1E    | TS1E1   | TS1E2   | $\text{C}_2\text{F}_4\text{O}$ | TS1E3   |
|-----------------------------------|-----------------------------------|---------|---------|---------|--------------------------------|---------|
| 21.92                             | 52.73                             | 59.21   | 47.96   | 67.10   | 48.91                          | 60.56   |
| 61.63                             | 129.97                            | 116.36  | 123.39  | 73.56   | 225.14                         | 201.81  |
| 141.70                            | 204.51                            | 134.04  | 215.92  | 171.69  | 236.57                         | 225.39  |
| 215.02                            | 254.14                            | 166.85  | 240.30  | 202.94  | 391.71                         | 321.48  |
| 248.21                            | 336.83                            | 244.40  | 299.30  | 251.15  | 434.76                         | 339.67  |
| 287.01                            | 371.33                            | 268.01  | 374.80  | 271.25  | 525.82                         | 381.80  |
| 357.40                            | 425.38                            | 284.17  | 409.95  | 374.35  | 607.71                         | 471.95  |
| 375.22                            | 543.38                            | 329.30  | 457.46  | 437.66  | 710.16                         | 497.97  |
| 382.41                            | 553.80                            | 395.17  | 526.19  | 548.96  | 789.77                         | 567.38  |
| 497.58                            | 597.84                            | 450.82  | 570.69  | 574.83  | 846.06                         | 592.14  |
| 545.26                            | 698.24                            | 507.15  | 616.34  | 662.03  | 1177.78                        | 606.50  |
| 556.06                            | 722.41                            | 572.65  | 677.38  | 692.42  | 1289.92                        | 657.07  |
| 613.14                            | 791.63                            | 633.34  | 793.20  | 729.20  | 1345.84                        | 757.22  |
| 641.93                            | 841.50                            | 718.41  | 999.09  | 910.10  | 1410.32                        | 890.65  |
| 689.30                            | 1113.12                           | 774.22  | 1126.73 | 1254.04 | 2021.77                        | 1036.77 |
| 781.27                            | 1209.81                           | 823.79  | 1306.13 | 1304.73 |                                | 1144.20 |
| 793.16                            | 1309.39                           | 1045.27 | 1324.52 | 1326.11 |                                | 1297.85 |
| 1048.83                           | 1328.10                           | 1086.64 | 1359.95 | 1341.09 |                                | 1331.79 |
| 1176.50                           | 1368.53                           | 1230.33 | 1502.67 | 1374.02 |                                | 1355.38 |
| 1203.00                           | 1433.58                           | 1281.73 | 2252.32 | 2338.67 |                                | 1462.77 |
| 1240.99                           | 2120.79                           | 1288.93 |         |         |                                | 1999.17 |
| 1258.59                           |                                   | 1314.49 |         |         |                                | 2181.73 |
| 1265.03                           |                                   | 1390.75 |         |         |                                | 3815.72 |
| 1350.11                           |                                   | 1477.61 |         |         |                                |         |
| 1422.18                           |                                   | 1845.53 |         |         |                                |         |
| 1893.57                           |                                   | 2438.45 |         |         |                                |         |
| 3788.34                           |                                   |         |         |         |                                |         |

Table S47: Vibrational frequencies ( $\text{cm}^{-1}$ ) of Perfluorononanoic acid (PFNA), and transition state TSN1 and TSN2 at M06-2X/6-31G(2df,p) level of theory

| PFNA   |         |         | TSN1   |         |         | TSN2   |         |         |
|--------|---------|---------|--------|---------|---------|--------|---------|---------|
| C1     | C2      | C3      | C4     | C5      | C6      | C7     | C8      | C9      |
| 42.75  | 349.13  | 1169.60 | 23.11  | 348.13  | 1194.31 | 18.29  | 342.52  | 1123.83 |
| 44.81  | 368.15  | 1191.53 | 38.40  | 350.79  | 1211.97 | 38.53  | 361.29  | 1153.39 |
| 57.45  | 377.08  | 1205.53 | 53.20  | 373.17  | 1244.08 | 47.05  | 369.58  | 1195.12 |
| 65.42  | 383.98  | 1227.56 | 78.06  | 393.09  | 1250.69 | 60.65  | 385.47  | 1221.84 |
| 69.12  | 387.98  | 1248.44 | 81.11  | 395.28  | 1271.40 | 72.26  | 402.92  | 1255.69 |
| 81.79  | 416.10  | 1265.93 | 90.21  | 422.49  | 1284.44 | 86.09  | 446.34  | 1267.30 |
| 103.76 | 458.52  | 1268.16 | 107.16 | 445.34  | 1288.65 | 103.70 | 464.02  | 1283.61 |
| 106.23 | 486.24  | 1280.26 | 108.50 | 454.99  | 1290.08 | 109.23 | 491.11  | 1287.03 |
| 138.76 | 498.88  | 1286.83 | 115.27 | 485.87  | 1301.34 | 132.58 | 494.37  | 1300.08 |
| 143.39 | 515.25  | 1297.35 | 131.62 | 503.67  | 1312.08 | 142.39 | 502.28  | 1307.26 |
| 149.72 | 525.68  | 1303.81 | 142.88 | 520.44  | 1315.87 | 150.27 | 515.59  | 1322.43 |
| 152.74 | 551.12  | 1323.00 | 156.05 | 550.69  | 1327.77 | 151.56 | 550.64  | 1328.89 |
| 158.08 | 572.63  | 1334.54 | 167.93 | 563.74  | 1333.04 | 163.33 | 577.82  | 1331.45 |
| 174.35 | 602.26  | 1339.71 | 172.00 | 603.07  | 1337.52 | 170.25 | 582.10  | 1336.08 |
| 193.47 | 629.84  | 1348.69 | 185.00 | 625.90  | 1345.85 | 190.99 | 602.61  | 1351.64 |
| 202.70 | 635.91  | 1359.26 | 206.14 | 645.78  | 1353.62 | 206.20 | 632.07  | 1361.63 |
| 229.89 | 646.97  | 1364.23 | 211.13 | 665.99  | 1376.92 | 229.97 | 652.35  | 1371.15 |
| 244.01 | 658.18  | 1369.07 | 249.89 | 670.24  | 1411.84 | 235.40 | 659.77  | 1383.26 |
| 250.22 | 671.36  | 1374.29 | 259.07 | 679.03  | 1437.86 | 245.80 | 679.26  | 1420.52 |
| 269.55 | 680.25  | 1420.59 | 265.56 | 704.88  | 1500.81 | 256.96 | 681.55  | 1554.67 |
| 279.91 | 684.63  | 1444.93 | 271.92 | 736.47  | 1894.19 | 272.44 | 691.69  | 1579.43 |
| 282.44 | 722.12  | 1944.64 | 287.67 | 775.67  | 2648.68 | 284.57 | 773.20  | 3870.88 |
| 291.46 | 778.33  | 3816.11 | 296.59 | 800.87  |         | 291.05 | 778.49  |         |
| 308.40 | 800.81  |         | 305.46 | 900.24  |         | 304.79 | 832.11  |         |
| 313.53 | 917.73  |         | 314.11 | 962.12  |         | 312.69 | 902.94  |         |
| 314.07 | 974.04  |         | 326.45 | 995.13  |         | 316.99 | 948.61  |         |
| 321.99 | 1027.31 |         | 332.71 | 1012.75 |         | 319.67 | 1007.43 |         |
| 327.98 | 1084.87 |         | 338.89 | 1075.79 |         | 322.66 | 1068.50 |         |
| 336.15 | 1132.11 |         | 344.15 | 1135.58 |         | 330.72 | 1083.95 |         |
| up C2  | up C3   |         | up C5  | up C6   |         | up C8  | up C9   |         |

Table S48: Vibrational frequencies ( $\text{cm}^{-1}$ ) of transition states TSN3, TSN4, and TSN5 at M06-2X/6-31G(2df,p) level of theory

| TN3    |         |         | TSN4   |         |         | TSN5   |         |         |
|--------|---------|---------|--------|---------|---------|--------|---------|---------|
| C1     | C2      | C3      | C4     | C5      | C6      | C7     | C8      | C9      |
| 17.60  | 335.50  | 1136.02 | 21.52  | 347.63  | 1156.01 | 34.21  | 345.50  | 1152.70 |
| 22.67  | 351.43  | 1162.68 | 32.87  | 351.45  | 1205.24 | 45.73  | 368.61  | 1186.89 |
| 43.11  | 368.95  | 1194.97 | 37.51  | 367.30  | 1216.68 | 53.15  | 381.75  | 1218.33 |
| 53.48  | 379.80  | 1208.47 | 46.98  | 374.98  | 1224.12 | 59.76  | 386.85  | 1225.61 |
| 63.67  | 385.14  | 1228.24 | 52.64  | 381.56  | 1248.28 | 69.41  | 424.08  | 1249.02 |
| 67.47  | 394.89  | 1245.39 | 60.27  | 399.94  | 1276.23 | 79.40  | 456.52  | 1260.46 |
| 100.17 | 439.74  | 1267.38 | 76.55  | 439.32  | 1277.76 | 104.35 | 471.07  | 1268.90 |
| 101.15 | 476.71  | 1271.68 | 106.68 | 454.18  | 1290.92 | 106.38 | 483.94  | 1277.97 |
| 124.69 | 493.21  | 1276.37 | 107.02 | 471.00  | 1296.25 | 137.62 | 496.02  | 1286.14 |
| 143.45 | 502.69  | 1284.82 | 144.73 | 503.64  | 1302.37 | 146.83 | 506.48  | 1298.41 |
| 146.91 | 519.74  | 1300.03 | 147.65 | 526.34  | 1323.67 | 149.97 | 520.31  | 1323.13 |
| 153.97 | 551.35  | 1322.89 | 162.10 | 552.43  | 1331.06 | 154.10 | 551.69  | 1334.01 |
| 155.47 | 601.98  | 1333.78 | 168.44 | 589.01  | 1333.57 | 154.54 | 602.71  | 1337.59 |
| 170.10 | 614.90  | 1346.10 | 178.64 | 600.88  | 1337.10 | 174.31 | 634.64  | 1344.08 |
| 178.18 | 623.89  | 1353.81 | 211.08 | 611.08  | 1343.43 | 191.44 | 638.99  | 1354.54 |
| 192.29 | 628.66  | 1361.25 | 223.30 | 622.17  | 1352.19 | 203.62 | 658.66  | 1362.84 |
| 207.67 | 646.17  | 1367.03 | 231.90 | 663.28  | 1379.90 | 219.14 | 666.16  | 1363.64 |
| 219.01 | 660.28  | 1369.39 | 238.73 | 672.84  | 1424.65 | 230.45 | 673.05  | 1369.08 |
| 232.03 | 669.25  | 1377.35 | 256.17 | 685.78  | 1444.26 | 248.16 | 680.60  | 1419.12 |
| 248.86 | 679.34  | 1421.03 | 260.69 | 692.08  | 1575.81 | 272.49 | 683.35  | 1431.08 |
| 271.25 | 684.47  | 2029.09 | 267.21 | 709.77  | 2003.85 | 279.21 | 685.29  | 1594.24 |
| 281.17 | 715.33  | 2341.39 | 285.11 | 735.98  | 2261.65 | 285.31 | 753.54  | 3607.41 |
| 283.39 | 778.55  |         | 293.81 | 776.38  |         | 290.43 | 778.06  |         |
| 290.37 | 903.86  |         | 299.88 | 791.41  |         | 312.89 | 846.62  |         |
| 309.49 | 938.11  |         | 315.53 | 897.58  |         | 315.33 | 922.93  |         |
| 313.09 | 967.69  |         | 320.79 | 948.90  |         | 317.22 | 971.00  |         |
| 316.59 | 996.39  |         | 327.88 | 1020.75 |         | 320.33 | 1021.27 |         |
| 323.88 | 1053.90 |         | 338.47 | 1034.54 |         | 330.58 | 1059.04 |         |
| 327.02 | 1107.42 |         | 343.13 | 1109.76 |         | 336.31 | 1103.68 |         |
| up C2  | up C3   |         | up C5  | up C6   |         | up C8  | up C9   |         |

Table S49: Vibrational frequencies ( $\text{cm}^{-1}$ ) of trifluoroacetic acid (TFA), and transition states TS1M, TS2M, TS3M, TS4M, and TS5M at M06-2X/6-31G(2df,p) level of theory

| TFA     | TS1M    | TS2M    | TS3M    | TS4M    | TS5M    |
|---------|---------|---------|---------|---------|---------|
| 16.85   | 111.33  | 46.58   | 47.77   | 105.09  | 83.37   |
| 233.73  | 164.05  | 112.69  | 163.38  | 161.67  | 133.35  |
| 246.38  | 230.90  | 120.62  | 167.98  | 173.93  | 346.23  |
| 389.89  | 269.27  | 199.21  | 250.36  | 303.37  | 415.08  |
| 426.29  | 271.52  | 274.70  | 398.77  | 397.81  | 457.42  |
| 512.49  | 424.04  | 319.73  | 511.83  | 442.50  | 527.98  |
| 593.67  | 600.81  | 607.96  | 538.70  | 536.36  | 597.51  |
| 601.63  | 699.04  | 678.27  | 628.86  | 593.48  | 680.89  |
| 674.53  | 779.71  | 709.95  | 705.26  | 684.24  | 744.58  |
| 802.03  | 835.59  | 735.00  | 757.82  | 732.05  | 755.87  |
| 813.28  | 940.26  | 844.61  | 951.27  | 811.12  | 982.62  |
| 1167.64 | 1149.36 | 1096.61 | 1154.51 | 1100.16 | 1127.79 |
| 1207.84 | 1336.32 | 1308.47 | 1183.09 | 1323.74 | 1227.31 |
| 1223.15 | 1445.24 | 1384.70 | 1252.44 | 1424.64 | 1351.58 |
| 1290.58 | 1449.93 | 1396.14 | 1373.90 | 1446.04 | 1405.36 |
| 1438.76 | 1878.51 | 2143.96 | 2029.19 | 1840.75 | 1582.58 |
| 1900.89 | 2923.57 | 3090.71 | 2316.74 | 3872.31 | 3601.95 |
| 3805.75 |         |         |         |         |         |

Table S50: Vibrational frequencies ( $\text{cm}^{-1}$ ) of Difluoroacetolactone ( $\text{CF}_2\text{CO}_2$ ), carbonyl fluoride ( $\text{CF}_2\text{O}$ ), perfluoro-formic acid ( $\text{FCOOH}$ ), and transition states TS1M1, TS1M2, TS1M3, and TS1M4 at M06-2X/6-31G(2df,p) level of theory

| $\text{CF}_2\text{CO}_2$ | TS1M1   | TS1M2   | $\text{CF}_2\text{O}$ | TS1M3   | FCOOH   | TS1M4   |
|--------------------------|---------|---------|-----------------------|---------|---------|---------|
| 202.49                   | 182.74  | 115.43  | 595.63                | 325.12  | 520.89  | 433.60  |
| 358.81                   | 309.18  | 222.78  | 635.05                | 433.98  | 569.55  | 679.76  |
| 469.29                   | 478.34  | 239.86  | 816.37                | 465.61  | 630.75  | 763.62  |
| 516.51                   | 507.72  | 436.69  | 1033.34               | 531.77  | 806.77  | 874.63  |
| 682.18                   | 605.13  | 688.38  | 1354.05               | 533.58  | 993.40  | 1061.25 |
| 702.07                   | 617.51  | 723.40  | 2050.20               | 675.58  | 1225.59 | 1355.36 |
| 747.10                   | 835.78  | 730.62  |                       | 759.22  | 1383.64 | 2108.68 |
| 849.10                   | 1079.72 | 1318.45 |                       | 958.05  | 2034.36 | 2339.56 |
| 1255.31                  | 1227.50 | 1361.41 |                       | 1126.89 | 3865.97 |         |
| 1346.01                  | 1520.53 | 1363.32 |                       | 1225.92 |         |         |
| 1414.09                  | 2237.20 | 2177.52 |                       | 1433.49 |         |         |
| 2125.09                  |         |         |                       | 2012.74 |         |         |
|                          |         |         |                       | 2183.03 |         |         |
|                          |         |         |                       | 3831.18 |         |         |

## Cartesian Coordinates (Å) at M06-2X/6-31G(2df,p) level of theory

The optimized geometries of the key species observed in Fig. 1 (article) are given in Tables S51 – Table S56.

Table S51: Cartesian coordinates (Å) of PFOA

---

| 0 | 1           |             |             |
|---|-------------|-------------|-------------|
| F | -0.93781800 | -1.27558400 | -1.47963800 |
| F | 0.62036900  | -1.87017000 | -0.08699000 |
| F | 1.39695900  | -0.17064800 | -1.88570500 |
| F | -0.18151300 | 1.24114000  | -1.39099100 |
| F | -1.77387200 | -1.93658700 | 0.90991700  |
| F | -0.50810100 | -0.45762800 | 1.86784800  |
| F | 2.17713800  | 1.98550600  | -0.63207900 |
| F | 0.87868700  | 1.59808800  | 1.06196100  |
| F | -3.06146800 | 0.14640800  | 1.78492300  |
| F | -1.80253800 | 1.53324900  | 0.68013300  |
| F | 2.15326000  | -0.62951700 | 1.64285400  |
| F | 3.51656800  | 1.03645400  | 1.35196300  |
| F | -3.69908900 | -1.03592400 | -0.69994300 |
| F | -2.73529700 | 0.65432300  | -1.62470600 |
| F | -4.35934600 | 0.96497400  | -0.25683500 |
| O | 4.23947100  | 0.11517200  | -1.04826100 |
| O | 3.49417600  | -1.86444400 | -0.27444800 |
| C | -0.22007400 | -0.88853500 | -0.41743500 |
| C | 0.63185300  | 0.31153100  | -0.89139900 |
| C | -1.20307400 | -0.73779900 | 0.76443200  |
| C | 1.58739700  | 1.02710100  | 0.08741800  |
| C | -2.33532200 | 0.31067000  | 0.67637500  |
| C | 2.69985400  | 0.17210200  | 0.73456600  |
| C | -3.30611000 | 0.21191900  | -0.51992100 |
| C | 3.51947300  | -0.67536300 | -0.25806700 |
| H | 4.73138700  | -0.45234400 | -1.65855500 |

---



Table S52: Cartesian coordinates (Å) of TSO1

---

| 0 | 1           |             |             |
|---|-------------|-------------|-------------|
| F | 1.16065700  | 1.94632800  | 0.44865900  |
| F | -0.48655400 | 1.11204400  | 1.60336000  |
| F | -1.08869100 | 2.01519900  | -0.82144100 |
| F | 0.28496800  | 0.62518000  | -1.75195600 |
| F | 1.81790200  | 0.05620900  | 2.13863300  |
| F | 0.40771200  | -1.34233400 | 1.26161300  |
| F | -2.31107200 | 0.01217200  | -1.88729900 |
| F | -1.01401700 | -1.44989400 | -0.92150600 |
| F | 2.96545000  | -1.78386900 | 0.74643700  |
| F | 1.73760700  | -1.41210800 | -1.00761200 |
| F | -2.18491000 | -0.94468200 | 1.40468900  |
| F | -3.68929000 | -1.86298900 | -0.48453400 |
| F | 4.36608600  | -0.50999100 | -0.98714400 |
| F | 3.82722100  | 0.88361800  | 0.56421100  |
| F | 2.85260200  | 0.96803200  | -1.35568000 |
| O | -4.94035400 | 0.10255600  | 0.07110500  |
| O | -3.25792600 | 1.51242700  | 0.80453100  |
| C | 0.35190000  | 0.89399700  | 0.58304100  |
| C | -0.50857400 | 0.82773900  | -0.69848200 |
| C | 1.22201800  | -0.31201000 | 1.00355900  |
| C | -1.61029900 | -0.26742600 | -0.79161000 |
| C | 2.31614300  | -0.84680000 | 0.05164000  |
| C | -2.61171800 | -0.36933200 | 0.36052600  |
| C | 3.36975800  | 0.16447200  | -0.44473600 |
| C | -3.82516000 | 0.49129500  | 0.40381700  |
| H | -4.44920100 | -1.22770000 | -0.36548800 |

---

Table S53: Cartesian coordinates ( $\text{\AA}$ ) of TSO2

---

| 0 | 1           |             |             |
|---|-------------|-------------|-------------|
| F | 1.56237900  | 1.89216900  | 0.09364700  |
| F | 0.14127500  | 1.85348400  | 1.70682200  |
| F | -0.82931700 | 2.79131100  | -0.49516200 |
| F | -0.08043300 | 1.13176500  | -1.67794300 |
| F | 1.51794700  | -0.16732400 | 2.09272800  |
| F | -0.21449500 | -0.93705800 | 1.03183900  |
| F | -2.97285500 | 1.66622200  | -0.59001200 |
| F | -2.13114500 | 0.94407100  | 1.46343500  |
| F | 2.07530400  | -2.12837100 | 0.53460900  |
| F | 1.19689700  | -1.18575400 | -1.21349400 |
| F | -1.31985400 | -1.18188200 | -1.41500300 |
| F | -3.43402100 | -0.61115500 | -1.56172700 |
| F | 3.70405300  | 0.31998400  | 0.63166700  |
| F | 3.06746200  | 0.52061700  | -1.42109400 |
| F | 4.03165900  | -1.27948200 | -0.76848000 |
| O | -3.02363500 | -1.17211100 | 1.66263000  |
| O | -2.77886100 | -2.77289400 | 0.04976100  |
| C | 0.48802800  | 1.25306900  | 0.57932400  |
| C | -0.61554500 | 1.47609300  | -0.49852600 |
| C | 0.90385900  | -0.19778400 | 0.91349300  |
| C | -2.01423100 | 0.81869400  | -0.45900300 |
| C | 1.83287000  | -0.96174300 | -0.06702800 |
| C | -2.31268100 | -0.51319400 | -0.84066000 |
| C | 3.20072100  | -0.31769700 | -0.41079200 |
| C | -2.79133900 | -1.74220100 | 0.60407400  |
| H | -2.56383000 | 0.01125700  | 1.66909700  |

---

Table S54: Cartesian coordinates (Å) of TSO3

---

| 0 | 1           |             |             |
|---|-------------|-------------|-------------|
| F | -0.85999300 | -0.99837000 | -1.65233600 |
| F | 0.80715700  | -1.62193500 | -0.40690700 |
| F | 1.32003600  | 0.39585500  | -1.94335100 |
| F | -0.35606600 | 1.55577900  | -1.18374200 |
| F | -1.53440700 | -2.09125400 | 0.62361900  |
| F | -0.40379800 | -0.63767500 | 1.77131200  |
| F | 2.02848400  | 2.34124800  | -0.41525700 |
| F | 0.78262000  | 1.67558900  | 1.23893100  |
| F | -3.00548700 | -0.31211400 | 1.81830700  |
| F | -1.92561400 | 1.35106200  | 0.92534900  |
| F | 2.18201000  | -0.50504700 | 1.52791700  |
| F | 3.55096000  | 1.16213700  | 1.26225100  |
| F | -3.59138600 | -1.16389900 | -0.80822800 |
| F | -2.83917000 | 0.74145800  | -1.47577600 |
| F | -4.44281700 | 0.66332200  | -0.05193500 |
| O | 3.96557300  | -0.54803100 | -1.45669000 |
| O | 3.77462500  | -2.13479300 | 0.24466900  |
| C | -0.14920500 | -0.69308500 | -0.56099100 |
| C | 0.55913400  | 0.64566900  | -0.85848100 |
| C | -1.09714400 | -0.82884500 | 0.65050300  |
| C | 1.50168700  | 1.26466400  | 0.19216200  |
| C | -2.33350500 | 0.09565100  | 0.73876800  |
| C | 2.67087400  | 0.36096900  | 0.61939100  |
| C | -3.32553400 | 0.07770900  | -0.44376400 |
| C | 3.73089600  | -1.21041800 | -0.43031200 |
| H | 3.32244800  | 0.18328500  | -0.81887100 |

---

Table S55: Cartesian coordinates (Å) of TSO4

---

|   |   |             |             |             |
|---|---|-------------|-------------|-------------|
| O | 1 |             |             |             |
| F |   | -0.89564600 | -0.45398100 | 1.92544900  |
| F |   | 0.80038200  | 0.79522600  | 1.34501300  |
| F |   | 1.08008000  | -1.84410100 | 1.07954400  |
| F |   | -0.42887100 | -1.90218200 | -0.46721600 |
| F |   | -1.55572200 | 1.90419000  | 1.03915100  |
| F |   | -0.39921900 | 1.64833700  | -0.78293000 |
| F |   | 2.24911200  | -1.74153300 | -1.22005300 |
| F |   | 0.82212200  | -0.30640000 | -2.01108300 |
| F |   | -3.05549100 | 1.56471000  | -1.02619200 |
| F |   | -1.99770700 | -0.22228900 | -1.66697600 |
| F |   | 2.22061600  | 1.52262700  | -1.07315000 |
| F |   | 4.57732800  | 0.31737900  | -0.62386100 |
| F |   | -3.65752400 | 0.24289700  | 1.35594300  |
| F |   | -2.84668700 | -1.55117800 | 0.48056900  |
| F |   | -4.47807100 | -0.53282100 | -0.47918400 |
| O |   | 3.66131500  | -0.85627500 | 1.05869500  |
| O |   | 3.68388500  | 1.42116200  | 1.18995300  |
| C |   | -0.22363700 | 0.03917700  | 0.89203200  |
| C |   | 0.45948400  | -1.13016000 | 0.15167000  |
| C |   | -1.14693800 | 1.01806300  | 0.13308600  |
| C |   | 1.49550000  | -0.68985500 | -0.92535000 |
| C |   | -2.39277700 | 0.48519400  | -0.60892400 |
| C |   | 2.45149500  | 0.43951800  | -0.49750400 |
| C |   | -3.37285900 | -0.36699500 | 0.21982700  |
| C |   | 3.64785200  | 0.40601300  | 0.49185500  |
| H |   | 3.81738100  | -0.69275600 | 1.99544600  |

---

Table S56: Cartesian coordinates (Å) of TSO5

---

| 0 | 1           |             |             |
|---|-------------|-------------|-------------|
| F | -0.93251500 | -1.62202000 | 1.09598600  |
| F | 0.58043100  | -0.28023700 | 1.88684900  |
| F | 1.37413700  | -1.89684000 | -0.04379000 |
| F | -0.17197100 | -1.17723800 | -1.38325300 |
| F | -1.83271900 | 0.63129300  | 2.03315900  |
| F | -0.58617600 | 1.81240000  | 0.71027000  |
| F | 2.15666900  | -0.30453100 | -2.04218000 |
| F | 0.85485400  | 1.28026500  | -1.37610500 |
| F | -3.12831700 | 1.73198900  | 0.07678300  |
| F | -1.83358300 | 0.86273400  | -1.43712800 |
| F | 2.06998500  | 1.66750700  | 0.79682600  |
| F | 3.50933500  | 1.61505500  | -0.72750100 |
| F | -3.70821100 | -0.89275300 | 0.91145800  |
| F | -2.70163500 | -1.57354300 | -0.86718600 |
| F | -4.35631800 | -0.21682200 | -1.02715300 |
| O | 4.77141400  | -1.40092700 | 0.23095600  |
| O | 3.23452500  | -0.19297700 | 1.24739500  |
| C | -0.22932900 | -0.50686400 | 0.85283200  |
| C | 0.64365500  | -0.82749800 | -0.38527700 |
| C | -1.24408100 | 0.66031100  | 0.83276300  |
| C | 1.59387200  | 0.24283200  | -0.96864300 |
| C | -2.36734400 | 0.67738900  | -0.22992700 |
| C | 2.69826300  | 0.81143200  | -0.04310800 |
| C | -3.30492700 | -0.54714200 | -0.29783500 |
| C | 3.77080500  | -0.57520500 | 0.16148700  |
| H | 4.94130800  | -1.59562600 | 1.17612200  |

---

The optimized geometries of the key species observed in Fig. 6 (article) are given in Tables S57 – Table S62.

Table S57: Cartesian coordinates (Å) of Perfluoro-3-Hexyl- $\alpha$ -lactone

| 0 | 1           |             |             |  |
|---|-------------|-------------|-------------|--|
| F | -0.93753100 | -0.49690000 | 1.91197000  |  |
| F | 0.69236200  | 0.92742700  | 1.68705300  |  |
| F | 1.35051800  | -1.58081300 | 1.35651400  |  |
| F | -0.08300100 | -1.84764300 | -0.25206100 |  |
| F | -1.65344900 | 1.86119700  | 1.04874200  |  |
| F | -0.27939100 | 1.77262400  | -0.62963700 |  |
| F | 2.45939600  | -1.64651900 | -0.96972900 |  |
| F | 1.17246800  | -0.08254100 | -1.77042200 |  |
| F | -2.82471800 | 1.45474800  | -1.22598500 |  |
| F | -1.57423300 | -0.25787900 | -1.70480700 |  |
| F | 2.32699100  | 1.73896500  | -0.23346500 |  |
| F | -3.64297400 | 0.06538000  | 1.07478100  |  |
| F | -2.64901500 | -1.66715800 | 0.26687700  |  |
| F | -4.18602700 | -0.68849000 | -0.86802100 |  |
| O | 5.32748200  | 0.11584300  | -0.50556900 |  |
| O | 3.50793100  | 0.14469600  | 0.99773600  |  |
| C | -0.15156600 | 0.12328800  | 1.02763600  |  |
| C | 0.71133300  | -0.96728500 | 0.35719700  |  |
| C | -1.05428500 | 1.04505200  | 0.17860300  |  |
| C | 1.78064600  | -0.53175300 | -0.67258800 |  |
| C | -2.15184600 | 0.42158900  | -0.71363100 |  |
| C | 2.79332500  | 0.50500000  | -0.20574800 |  |
| C | -3.18472900 | -0.49741800 | -0.02872200 |  |
| C | 4.21947900  | 0.22554300  | -0.13668500 |  |

Table S58: Cartesian coordinates ( $\text{\AA}$ ) of TS1O1

---

|   |   |             |             |             |
|---|---|-------------|-------------|-------------|
| O | 1 |             |             |             |
| F |   | -1.01664000 | -0.63511800 | 1.87990800  |
| F |   | 0.62195900  | 0.79743000  | 1.82514000  |
| F |   | 1.27732000  | -1.70703300 | 1.33895200  |
| F |   | -0.08095100 | -1.82199000 | -0.34863000 |
| F |   | -1.69510900 | 1.77655800  | 1.16298000  |
| F |   | -0.25097000 | 1.81479000  | -0.45635000 |
| F |   | 2.49241400  | -1.58601700 | -0.95836800 |
| F |   | 1.25450000  | 0.05253900  | -1.65882000 |
| F |   | -2.76866900 | 1.55232200  | -1.17980300 |
| F |   | -1.50133300 | -0.12171400 | -1.74125300 |
| F |   | 2.36584700  | 1.72323900  | -0.03086600 |
| F |   | -3.68741000 | -0.00303900 | 0.96494200  |
| F |   | -2.65780900 | -1.67482500 | 0.07817000  |
| F |   | -4.14089400 | -0.61022700 | -1.05086700 |
| O |   | 5.30870100  | 0.15047100  | -0.76303500 |
| O |   | 3.45513100  | 0.10196500  | 1.13518500  |
| C |   | -0.19032900 | 0.04349500  | 1.07726700  |
| C |   | 0.69556300  | -1.00470800 | 0.36802800  |
| C |   | -1.05698400 | 1.02782600  | 0.25949500  |
| C |   | 1.80467300  | -0.49682200 | -0.57591800 |
| C |   | -2.11673400 | 0.47979000  | -0.72275900 |
| C |   | 2.83364700  | 0.46425000  | 0.06588200  |
| C |   | -3.17839000 | -0.48455600 | -0.15465500 |
| C |   | 4.20506300  | 0.29876900  | -0.55124200 |

---

Table S59: Cartesian coordinates ( $\text{\AA}$ ) of TS1O2

---

| 0 | 1           |             |             |
|---|-------------|-------------|-------------|
| F | 4.04179700  | 1.69848700  | -0.07950400 |
| O | 4.98312900  | -1.81474400 | -0.31405600 |
| O | 3.91091600  | -0.47842300 | 1.25979300  |
| C | 3.47231900  | 0.57819200  | -0.39386200 |
| C | 4.40597100  | -1.06205000 | 0.34006500  |
| C | 1.96989000  | 0.77900100  | -0.06138700 |
| F | 1.74939600  | 1.14946900  | 1.19959900  |
| F | 1.59190200  | 1.77384800  | -0.88388100 |
| C | 1.13458100  | -0.46236900 | -0.41848400 |
| F | 1.09903700  | -0.55973300 | -1.74700100 |
| F | 1.73872200  | -1.55562000 | 0.07358200  |
| C | -0.31888400 | -0.52549300 | 0.11909000  |
| F | -0.28580700 | -0.65774900 | 1.44446000  |
| F | -0.84626100 | -1.62947000 | -0.42525000 |
| C | -1.22416200 | 0.66260700  | -0.23944600 |
| C | -2.67267300 | 0.59888400  | 0.30880100  |
| F | -1.27119800 | 0.77615200  | -1.56664500 |
| F | -0.69958500 | 1.77534400  | 0.28528900  |
| F | -3.30541200 | 1.64926100  | -0.21862300 |
| F | -2.63236400 | 0.72750500  | 1.63467400  |
| C | -3.50285000 | -0.65781400 | -0.01753300 |
| F | -3.13272900 | -1.66095100 | 0.75834600  |
| F | -4.77572900 | -0.39162600 | 0.21210800  |
| F | -3.35371400 | -0.99718500 | -1.28597400 |

---



Table S60: Cartesian coordinates ( $\text{\AA}$ ) of C7-perfluorinated aldehyde

---

| 0 | 1           |             |             |
|---|-------------|-------------|-------------|
| F | 0.50484200  | -0.53826700 | -1.92233000 |
| F | -1.10758100 | 0.90332100  | -1.65433600 |
| F | -1.77012400 | -1.59269200 | -1.27024100 |
| F | -0.30643400 | -1.84515100 | 0.31562800  |
| F | 1.29268500  | 1.80459500  | -1.14085700 |
| F | -0.05164700 | 1.81447400  | 0.56194700  |
| F | -2.82380900 | -1.54656900 | 1.10391300  |
| F | -1.50645200 | 0.04531900  | 1.77825800  |
| F | 2.49480200  | 1.46989500  | 1.13883500  |
| F | 1.22779100  | -0.20843400 | 1.69245300  |
| F | -2.74225300 | 1.77772400  | 0.35613900  |
| F | 3.27216600  | 0.00566200  | -1.11607400 |
| F | 2.23925800  | -1.68591300 | -0.27211400 |
| F | 3.80594300  | -0.72482000 | 0.83830100  |
| O | -4.11437100 | 0.25082000  | -0.44717600 |
| C | -0.24041000 | 0.09927800  | -1.01762300 |
| C | -1.09546000 | -0.96841400 | -0.30107300 |
| C | 0.69641300  | 1.03773300  | -0.22469500 |
| C | -2.13800900 | -0.46985600 | 0.72313400  |
| C | 1.79888000  | 0.43102900  | 0.67141300  |
| C | -3.13539200 | 0.54173000  | 0.13094900  |
| C | 2.80602800  | -0.52464600 | -0.00015300 |

---

Table S61: Cartesian coordinates ( $\text{\AA}$ ) of TS1O3

---

| 0 | 1           |             |             |
|---|-------------|-------------|-------------|
| F | 0.11739600  | -1.21969400 | 1.18732900  |
| F | -0.89911900 | -1.47510700 | -0.71182500 |
| F | -1.11863600 | 0.88777900  | 1.60646400  |
| F | -0.33046800 | 1.71336700  | -0.23900700 |
| F | 1.67219800  | -1.60273100 | -0.92514400 |
| F | 0.84928100  | 0.12911400  | -1.92810500 |
| F | -2.83556300 | 1.98907400  | -0.16457200 |
| F | -2.30445400 | 0.49896100  | -1.63859900 |
| F | 2.38701800  | 1.61539500  | -0.70790700 |
| F | 1.65346800  | 0.88168300  | 1.20388300  |
| F | -3.59905000 | -1.46051900 | -0.75554300 |
| F | 4.07881800  | -0.52042200 | -0.84459100 |
| F | 3.33273300  | -1.21374000 | 1.06320300  |
| F | 4.29401400  | 0.70413000  | 0.91044000  |
| O | -4.50674400 | 0.21568300  | 0.78962900  |
| C | -0.18212500 | -0.62448500 | 0.03532600  |
| C | -1.00225800 | 0.68022600  | 0.29691200  |
| C | 1.13522000  | -0.39037800 | -0.73843300 |
| C | -2.41295400 | 0.73462000  | -0.33697500 |
| C | 2.15635100  | 0.52400700  | 0.01249200  |
| C | -3.48874100 | -0.15368200 | 0.34276200  |
| C | 3.50797100  | -0.15720300 | 0.28975600  |
| O | -2.70034100 | -1.30325700 | 1.18944400  |
| H | -3.04697100 | -1.86268800 | 0.28624400  |
| H | -3.25587400 | -1.46094800 | 1.96591100  |

---

Table S62: Cartesian coordinates (Å) of perfluoroheptanoic acid

---

| 0 | 1           |             |             |
|---|-------------|-------------|-------------|
| F | 1.25437900  | 1.69378500  | -1.31446700 |
| F | -0.09456100 | 1.82857200  | 0.38178800  |
| F | -1.09492300 | 0.68763800  | -1.76270700 |
| F | 0.52549500  | -0.76580900 | -1.83499500 |
| F | 2.47979800  | 1.61135200  | 0.96193800  |
| F | 1.25721700  | -0.02446800 | 1.70755500  |
| F | -1.76688600 | -1.73922100 | -1.07143500 |
| F | -0.29164800 | -1.80770900 | 0.51888500  |
| F | 3.84563500  | -0.55830200 | 0.86155200  |
| F | 2.27736400  | -1.68863300 | -0.07293600 |
| F | -1.45299000 | 0.13509200  | 1.82488300  |
| F | -2.87776000 | -1.39041200 | 1.22255400  |
| O | -3.82631400 | 0.16696900  | -0.72932800 |
| O | -2.96993600 | 1.85189600  | 0.49601100  |
| C | 0.67707200  | 1.00275800  | -0.32701900 |
| C | -0.23561600 | -0.03032900 | -1.02115000 |
| C | 1.79948900  | 0.51526200  | 0.61670400  |
| C | -1.09096500 | -1.00470700 | -0.18462900 |
| C | 2.81692600  | -0.48850000 | 0.03624000  |
| C | -2.11225700 | -0.37863300 | 0.79131400  |
| C | -3.01441900 | 0.70762700  | 0.17437200  |
| H | -4.36892400 | 0.87883300  | -1.09722300 |
| F | 3.23860500  | -0.08973300 | -1.15052900 |

---

The optimized geometries of the key species observed in Figure S2 are given in Tables S63 – Table S65.

Table S63: Cartesian coordinates (Å) of iso-PFOA

| 0 | 1           |             |             |
|---|-------------|-------------|-------------|
| F | -2.13496600 | 2.03055100  | 0.10167500  |
| F | -0.60363100 | 1.49627300  | -1.33860300 |
| F | 0.25664300  | 1.98147400  | 1.10051700  |
| F | -1.10314500 | 0.51007100  | 1.94914200  |
| F | -2.98134100 | 0.43671500  | -1.75969000 |
| F | -1.43065800 | -1.03816100 | -1.37701400 |
| F | 1.37855700  | -0.20513400 | 1.98450500  |
| F | 0.17912500  | -1.46677700 | 0.68848400  |
| F | -3.99702500 | -1.53186600 | -0.46504800 |
| F | -2.43627500 | -1.57493700 | 1.00846700  |
| F | 1.16477600  | -0.36371200 | -1.49807700 |
| O | 3.09736900  | 1.58171200  | 0.68847300  |
| O | 2.23790500  | 2.02524000  | -1.34436200 |
| C | -1.31590900 | 1.05370600  | -0.30258100 |
| C | -0.35656900 | 0.80788100  | 0.88266600  |
| C | -2.20001200 | -0.10356200 | -0.82086700 |
| C | 0.75591000  | -0.26822900 | 0.80373500  |
| C | -3.12876400 | -0.79229500 | 0.20122100  |
| C | 1.78859600  | -0.10227000 | -0.33073000 |
| C | 2.39055000  | 1.31159400  | -0.40676200 |
| H | 3.45365600  | 2.47654800  | 0.59243700  |
| F | -3.78223800 | 0.10461100  | 0.91751800  |
| C | 2.92451500  | -1.14853000 | -0.22500000 |
| F | 3.80456300  | -0.89118000 | -1.18532400 |
| F | 2.44091200  | -2.36263200 | -0.41436900 |
| F | 3.54628600  | -1.11217700 | 0.93721600  |

Table S64: Cartesian coordinates ( $\text{\AA}$ ) of TSO1a

---

| 0 | 1           |             |             |
|---|-------------|-------------|-------------|
| F | -1.87037200 | 1.38218200  | 1.65640800  |
| F | -0.55561200 | 1.91175800  | -0.00086700 |
| F | 0.44353500  | 0.45113000  | 1.97631300  |
| F | -0.96813800 | -1.13972500 | 1.61725200  |
| F | -3.38989900 | 1.51042700  | -0.24885500 |
| F | -2.00496200 | 0.72672200  | -1.71027700 |
| F | 0.67586300  | -2.08374100 | 0.09561300  |
| F | 0.11281300  | -0.49026000 | -1.26029800 |
| F | -4.09058600 | -0.87418200 | -1.16082800 |
| F | -2.20171100 | -1.73259900 | -0.59442500 |
| F | 2.58927700  | -0.93808100 | -1.81328900 |
| O | 3.86641800  | -1.84730600 | -0.04363400 |
| O | 2.86736000  | -0.69073400 | 1.70981500  |
| C | -1.28570600 | 0.93148300  | 0.54596100  |
| C | -0.28860300 | -0.15296700 | 1.04277300  |
| C | -2.43531100 | 0.60090600  | -0.45914200 |
| C | 0.64398100  | -0.76422400 | -0.06659700 |
| C | -3.08477800 | -0.78364000 | -0.31383600 |
| C | 2.08948700  | -0.26330700 | -0.07289400 |
| C | 3.11267800  | -1.08998700 | 0.56223500  |
| H | 3.28319700  | -1.48977600 | -1.29014700 |
| C | 2.44075400  | 1.19918000  | -0.37251500 |
| F | 3.73652100  | 1.28715800  | -0.60471000 |
| F | 1.77766200  | 1.60594900  | -1.43612300 |
| F | 2.13455900  | 1.96769200  | 0.65227000  |
| F | -3.53433200 | -0.94782800 | 0.91679300  |

---

Table S65: Cartesian coordinates ( $\text{\AA}$ ) of TSO3a

---

| 0 | 1           |             |             |
|---|-------------|-------------|-------------|
| F | 2.31759800  | 1.86624600  | -0.67439400 |
| F | 1.94480000  | 1.18652500  | 1.34626600  |
| F | 0.13478700  | 2.80937700  | 0.56896500  |
| F | -0.08673100 | 1.87921400  | -1.38021200 |
| F | 0.95144100  | -1.20326500 | 0.25386900  |
| F | 1.58082100  | -0.44037300 | -1.69994800 |
| F | -1.97449600 | 1.65827300  | 1.02660400  |
| F | -0.34300000 | 0.35832300  | 2.00165400  |
| F | 3.33922100  | -2.08400200 | -0.67795700 |
| F | 4.12160600  | -0.07951300 | -0.62179100 |
| F | -1.00141300 | -0.58260800 | -1.37933600 |
| O | -1.42808100 | -1.67553400 | 1.96229700  |
| O | -1.72455000 | -2.75625900 | -0.03454000 |
| C | 1.55556200  | 1.06754900  | 0.08149400  |
| C | 0.11355200  | 1.64589800  | -0.07874100 |
| C | 1.79301100  | -0.37659400 | -0.38963400 |
| C | -1.13836600 | 0.88798800  | 0.40813100  |
| C | 3.22030700  | -0.89750800 | -0.11107200 |
| C | -1.67806900 | -0.22555600 | -0.26921400 |
| C | -1.58903400 | -1.92947300 | 0.77576400  |
| H | -0.82482000 | -0.58233800 | 2.11046800  |
| F | 3.42103700  | -1.01795500 | 1.18722500  |
| C | -3.17693700 | -0.14661700 | -0.53122100 |
| F | -3.52111000 | 0.99793800  | -1.11946700 |
| F | -3.84320000 | -0.22760300 | 0.61678200  |
| F | -3.54739400 | -1.13362400 | -1.31998800 |

---

The optimized geometries of the key species observed in Figure S7 are given in Tables S66 – Table S72.

Table S66: Cartesian coordinates (Å) of perfluoroheptanoic acid

| 0 | 1           |             |             |
|---|-------------|-------------|-------------|
| F | 1.25437900  | 1.69378500  | -1.31446700 |
| F | -0.09456100 | 1.82857200  | 0.38178800  |
| F | -1.09492300 | 0.68763800  | -1.76270700 |
| F | 0.52549500  | -0.76580900 | -1.83499500 |
| F | 2.47979800  | 1.61135200  | 0.96193800  |
| F | 1.25721700  | -0.02446800 | 1.70755500  |
| F | -1.76688600 | -1.73922100 | -1.07143500 |
| F | -0.29164800 | -1.80770900 | 0.51888500  |
| F | 3.84563500  | -0.55830200 | 0.86155200  |
| F | 2.27736400  | -1.68863300 | -0.07293600 |
| F | -1.45299000 | 0.13509200  | 1.82488300  |
| F | -2.87776000 | -1.39041200 | 1.22255400  |
| O | -3.82631400 | 0.16696900  | -0.72932800 |
| O | -2.96993600 | 1.85189600  | 0.49601100  |
| C | 0.67707200  | 1.00275800  | -0.32701900 |
| C | -0.23561600 | -0.03032900 | -1.02115000 |
| C | 1.79948900  | 0.51526200  | 0.61670400  |
| C | -1.09096500 | -1.00470700 | -0.18462900 |
| C | 2.81692600  | -0.48850000 | 0.03624000  |
| C | -2.11225700 | -0.37863300 | 0.79131400  |
| C | -3.01441900 | 0.70762700  | 0.17437200  |
| H | -4.36892400 | 0.87883300  | -1.09722300 |
| F | 3.23860500  | -0.08973300 | -1.15052900 |

Table S67: Cartesian coordinates (Å) of TS71

---

| 0 | 1           |             |             |
|---|-------------|-------------|-------------|
| F | -1.56667000 | 2.08788800  | 0.36091200  |
| F | -0.07430600 | 1.56316000  | -1.13441700 |
| F | 0.72644600  | 1.66492400  | 1.43958200  |
| F | -0.68046000 | 0.10095600  | 1.96113900  |
| F | -2.55963400 | 0.81214100  | -1.65638700 |
| F | -1.11968500 | -0.80949000 | -1.50019300 |
| F | 1.90190900  | -0.60770600 | 1.72670100  |
| F | 0.48146200  | -1.64417800 | 0.43634400  |
| F | -3.76981400 | -1.17111500 | -0.62571800 |
| F | -2.17901300 | -1.66153900 | 0.72850500  |
| F | 1.53081400  | -0.47961500 | -1.67904300 |
| F | 3.11501800  | -1.96432000 | -0.28056300 |
| O | 4.41033200  | 0.05062600  | -0.29806200 |
| O | 2.74491500  | 1.65193100  | -0.43701000 |
| C | -0.84764900 | 1.09026600  | -0.14951200 |
| C | 0.08003300  | 0.60107600  | 0.98152400  |
| C | -1.82581000 | 0.09036400  | -0.80881900 |
| C | 1.12728000  | -0.50057000 | 0.65109000  |
| C | -2.80011300 | -0.67046300 | 0.11668400  |
| C | 2.05027900  | -0.26116400 | -0.54480800 |
| C | 3.29354600  | 0.54579700  | -0.41233100 |
| H | 3.89202400  | -1.33885800 | -0.25460500 |
| F | -3.31711200 | 0.14740200  | 1.01560700  |

---



Table S68: Cartesian coordinates (Å) of Perfluoro-3-Pentyl- $\alpha$ -lactone

---

| 0 | 1           |             |             |
|---|-------------|-------------|-------------|
| F | 1.32939000  | -0.10001000 | -2.10589900 |
| F | -0.12722700 | 1.33492300  | -1.36302000 |
| F | -1.00123700 | -1.13634100 | -1.75657000 |
| F | 0.46212600  | -1.93859300 | -0.36307500 |
| F | 2.40077900  | 1.72479500  | -0.62935200 |
| F | 1.01460800  | 1.39630200  | 1.01299300  |
| F | -2.06052500 | -1.76868500 | 0.50142600  |
| F | -0.62481200 | -0.60185500 | 1.65170700  |
| F | 3.63225000  | 0.42364900  | 1.18986400  |
| F | 2.02568800  | -0.96250700 | 1.51760400  |
| F | -1.63621400 | 1.65935800  | 0.77028800  |
| O | -4.76977600 | 0.28635100  | 0.64989200  |
| O | -2.96621700 | 0.61052200  | -0.83811400 |
| C | 0.64681600  | 0.29367800  | -1.03032300 |
| C | -0.28822200 | -0.87380800 | -0.65943800 |
| C | 1.66759500  | 0.81031900  | 0.00864900  |
| C | -1.29185800 | -0.67331200 | 0.49981000  |
| C | 2.64013500  | -0.22633700 | 0.60996800  |
| C | -2.21337500 | 0.53419700  | 0.39296000  |
| C | -3.65920400 | 0.40846400  | 0.29285500  |
| F | 3.12702100  | -1.01039100 | -0.33498000 |

---

Table S69: Cartesian coordinates (Å) of TS171

---

| 0 | 1           |             |             |
|---|-------------|-------------|-------------|
| F | 1.44247600  | 1.59992800  | 1.34113700  |
| F | -0.02732700 | 0.11886400  | 1.95876400  |
| F | -0.90834800 | 2.13694100  | 0.44299800  |
| F | 0.45913400  | 1.58830700  | -1.15320100 |
| F | 2.46497600  | -0.74587800 | 1.61704500  |
| F | 0.98094500  | -1.69452800 | 0.34336500  |
| F | -2.10703300 | 0.91228800  | -1.50789100 |
| F | -0.72993000 | -0.76478300 | -1.46007200 |
| F | 3.56278600  | -1.24242800 | -0.63125000 |
| F | 1.91573100  | -0.50028800 | -1.79021100 |
| F | -1.68315100 | -1.63622000 | 0.75722600  |
| O | -4.76302000 | -0.75078500 | -0.42814900 |
| O | -2.89466500 | 0.24500500  | 1.17175600  |
| C | 0.70482600  | 0.56567600  | 0.93311200  |
| C | -0.26535500 | 1.12130300  | -0.12882800 |
| C | 1.67593400  | -0.57640300 | 0.55333600  |
| C | -1.32448000 | 0.16443200  | -0.71203400 |
| C | 2.59250800  | -0.34678900 | -0.66671800 |
| C | -2.25898500 | -0.49574100 | 0.33036200  |
| C | -3.64786600 | -0.71285700 | -0.22844900 |
| F | 3.11885100  | 0.86430000  | -0.63274800 |

---

Table S70: Cartesian coordinates (Å) of TS172

---

| 0 | 1           |             |             |
|---|-------------|-------------|-------------|
| F | 3.25898400  | 1.95256300  | -0.10326300 |
| O | 4.61261200  | -1.41123000 | -0.51395200 |
| O | 3.48437200  | -0.26140100 | 1.16455400  |
| C | 2.81881800  | 0.77746900  | -0.42424300 |
| C | 3.98968300  | -0.75358400 | 0.19818600  |
| C | 1.32623200  | 0.77078300  | -0.00119000 |
| F | 1.13378300  | 1.07191300  | 1.28237100  |
| F | 0.76648300  | 1.73246500  | -0.75841600 |
| C | 0.63670400  | -0.55640900 | -0.35632100 |
| F | 0.61356700  | -0.66496000 | -1.68430900 |
| F | 1.35414700  | -1.57434500 | 0.14245000  |
| C | -0.79977300 | -0.74510400 | 0.19007100  |
| F | -0.73250900 | -0.86308200 | 1.51586700  |
| F | -1.25496900 | -1.89097300 | -0.32909100 |
| C | -1.79423400 | 0.38053500  | -0.15291600 |
| C | -3.26702200 | -0.01050800 | 0.09067900  |
| F | -1.67223400 | 0.71783200  | -1.43818600 |
| F | -1.51724100 | 1.43511300  | 0.61684000  |
| F | -3.66991600 | -0.87779100 | -0.81806800 |
| F | -4.00989600 | 1.07808100  | 0.00495500  |
| F | -3.40779100 | -0.53882100 | 1.29435900  |

---

Table S71: Cartesian coordinates ( $\text{\AA}$ ) of C6-perfluorinated aldehyde

---

| 0 | 1 |             |             |             |
|---|---|-------------|-------------|-------------|
| F |   | -0.81962600 | -0.16535600 | 2.14013300  |
| F |   | 0.51607400  | 1.35227900  | 1.32828300  |
| F |   | 1.53626500  | -1.07204400 | 1.62547800  |
| F |   | 0.04561400  | -1.93055900 | 0.29253300  |
| F |   | -2.08878100 | 1.60574800  | 0.78556300  |
| F |   | -0.77695000 | 1.43344800  | -0.93841700 |
| F |   | 2.48465300  | -1.55914800 | -0.74151600 |
| F |   | 0.93182100  | -0.39718300 | -1.72448900 |
| F |   | -3.33339700 | 0.29588600  | -1.02485300 |
| F |   | -1.66650000 | -0.97990400 | -1.47664600 |
| F |   | 1.94609200  | 1.79968200  | -0.93292500 |
| O |   | 3.55444000  | 0.76094500  | 0.16099000  |
| C |   | -0.22950200 | 0.27579300  | 1.03065600  |
| C |   | 0.74348100  | -0.83052400 | 0.57917700  |
| C |   | -1.33701400 | 0.76604800  | 0.07042300  |
| C |   | 1.66597100  | -0.51601600 | -0.61782300 |
| C |   | -2.27520800 | -0.30799900 | -0.51716000 |
| C |   | 2.52475700  | 0.74298800  | -0.40163700 |
| F |   | -2.66308800 | -1.14610400 | 0.42799800  |

---

Table S72: Cartesian coordinates (Å) of TS173

---

| 0 | 1           |             |             |
|---|-------------|-------------|-------------|
| F | 0.54349900  | 1.20048300  | -1.41084200 |
| F | -0.35053700 | 1.56893700  | 0.53024400  |
| F | -0.59303000 | -0.98966200 | -1.56384600 |
| F | 0.37662100  | -1.61543900 | 0.27248700  |
| F | 2.23676800  | 1.83939600  | 0.51055500  |
| F | 1.55421400  | 0.20331900  | 1.75888900  |
| F | -2.10567900 | -2.03151600 | 0.42152600  |
| F | -1.56079600 | -0.39182000 | 1.72159700  |
| F | 3.03880900  | -1.38133700 | 0.55489400  |
| F | 2.27269800  | -0.77404600 | -1.36228600 |
| F | -3.03563900 | 1.40734900  | 0.78551000  |
| O | -3.94516000 | -0.44205200 | -0.54717100 |
| C | 0.36344100  | 0.69477400  | -0.19337100 |
| C | -0.39473500 | -0.66819900 | -0.28738300 |
| C | 1.74066200  | 0.60192400  | 0.50259400  |
| C | -1.74906100 | -0.74560700 | 0.45633400  |
| C | 2.76797600  | -0.34203800 | -0.20670100 |
| C | -2.92294000 | 0.02042900  | -0.20981100 |
| O | -2.26994200 | 1.13595600  | -1.20309600 |
| H | -2.58565200 | 1.75022900  | -0.32483300 |
| H | -2.88741800 | 1.19478700  | -1.94582600 |
| F | 3.88549800  | 0.31278700  | -0.45175000 |

---

The optimized geometries of the key species observed in Figure S8 are given in Tables S73 – Table S79.

Table S73: Cartesian coordinates (Å) of Perfluorohexanoic acid

| 0 | 1           |             |             |  |
|---|-------------|-------------|-------------|--|
| F | -2.04136000 | 1.60275200  | 0.87677000  |  |
| F | -0.73708300 | 1.46849800  | -0.85853100 |  |
| F | 0.53000100  | 1.25164900  | 1.42168000  |  |
| F | -0.82080100 | -0.30386000 | 2.12521200  |  |
| F | -3.33823900 | 0.42909100  | -0.98049900 |  |
| F | -1.72394700 | -0.88082500 | -1.51363200 |  |
| F | 1.53147200  | -1.19778100 | 1.53581200  |  |
| F | 0.01936400  | -1.94981200 | 0.16823600  |  |
| F | 0.87818400  | -0.40361800 | -1.77230000 |  |
| F | 2.51195300  | -1.48341200 | -0.82991500 |  |
| O | 3.31037800  | 0.71859700  | 0.45544500  |  |
| O | 2.16622600  | 1.81476200  | -1.14592500 |  |
| C | -1.31842600 | 0.77388300  | 0.11815800  |  |
| C | -0.22414500 | 0.20472600  | 1.04758000  |  |
| C | -2.29700100 | -0.23712800 | -0.51522500 |  |
| C | 0.73525500  | -0.87599500 | 0.51446900  |  |
| C | 1.63200500  | -0.48468800 | -0.68031800 |  |
| C | 2.39294600  | 0.84290300  | -0.49861800 |  |
| H | 3.75556200  | 1.57316500  | 0.54557700  |  |
| F | -2.70867700 | -1.10848700 | 0.38961000  |  |

Table S74: Cartesian coordinates ( $\text{\AA}$ ) of TS61

---

| 0 | 1           |             |             |
|---|-------------|-------------|-------------|
| F | -2.39400700 | 1.53988900  | -0.49271900 |
| F | -0.89927000 | 0.43696100  | -1.63515900 |
| F | 0.03783400  | 2.14446600  | 0.21277800  |
| F | -1.04368900 | 1.10822200  | 1.77873100  |
| F | -3.28720800 | -0.81775800 | -1.02918000 |
| F | -1.48544600 | -1.80036400 | -0.39356600 |
| F | 1.58137700  | 0.63647400  | 1.65780600  |
| F | 0.26302100  | -1.09000600 | 1.44119600  |
| F | 1.01897400  | -1.35324200 | -1.07799400 |
| F | 2.87612600  | -1.54852600 | 0.70664900  |
| O | 3.85346400  | 0.15389600  | -0.66649200 |
| O | 1.96113500  | 1.18675400  | -1.50994600 |
| C | -1.50272900 | 0.55168200  | -0.44793500 |
| C | -0.44420800 | 0.96859400  | 0.59440900  |
| C | -2.27487000 | -0.75773600 | -0.18592500 |
| C | 0.74453200  | -0.00012400 | 0.84427400  |
| C | 1.55766900  | -0.45222800 | -0.36915900 |
| C | 2.67066500  | 0.37678300  | -0.90500700 |
| H | 3.55163600  | -0.96775600 | 0.25680200  |
| F | -2.73157900 | -0.79825800 | 1.05043100  |

---

Table S75: Cartesian coordinates ( $\text{\AA}$ ) of Perfluoro-3-Butyl- $\alpha$ -lactone

---

| 0 | 1           |             |             |
|---|-------------|-------------|-------------|
| F | 2.17138200  | 0.99929100  | 1.32436400  |
| F | 0.74387500  | -0.62438000 | 1.59192000  |
| F | -0.34185300 | 1.72887600  | 1.13163600  |
| F | 0.80085300  | 1.98853800  | -0.70026900 |
| F | 3.20187600  | -1.12939100 | 0.35208600  |
| F | 1.42253100  | -1.70164100 | -0.70491600 |
| F | -1.74895300 | 1.40777400  | -1.04594500 |
| F | -0.37807000 | -0.10278500 | -1.81807900 |
| F | -1.09690700 | -1.80666300 | 0.08042000  |
| O | -4.29855500 | -0.59951200 | -0.01447800 |
| O | -2.33695200 | -0.20053200 | 1.23605600  |
| C | 1.31790100  | 0.18831400  | 0.69874200  |
| C | 0.22190700  | 1.09364100  | 0.10124200  |
| C | 2.13754400  | -0.67476600 | -0.28273800 |
| C | -0.90721500 | 0.42407200  | -0.71078600 |
| C | -1.71808700 | -0.64453300 | 0.00764800  |
| C | -3.15210900 | -0.52584400 | 0.22189200  |
| F | 2.52353400  | 0.04427700  | -1.32106500 |

---



Table S76: Cartesian coordinates ( $\text{\AA}$ ) of TS161

---

| 0 | 1           |             |             |
|---|-------------|-------------|-------------|
| F | -2.26799600 | 1.07823100  | -1.15248600 |
| F | -0.82930300 | -0.48605100 | -1.63605300 |
| F | 0.21348400  | 1.88110500  | -1.02298100 |
| F | -0.79756800 | 1.89799700  | 0.89959700  |
| F | -3.19608900 | -1.15400400 | -0.32195900 |
| F | -1.35549800 | -1.76446200 | 0.59889200  |
| F | 1.79668500  | 1.35439200  | 1.00835100  |
| F | 0.51141900  | -0.25329200 | 1.70418500  |
| F | 1.15109700  | -1.76578500 | -0.28303500 |
| O | 4.33291300  | -0.57597800 | 0.08176600  |
| O | 2.19972300  | -0.10025000 | -1.42336800 |
| C | -1.36316100 | 0.23716500  | -0.64856900 |
| C | -0.25252800 | 1.11636700  | -0.03721400 |
| C | -2.11145000 | -0.72493200 | 0.29788900  |
| C | 0.93995200  | 0.39661400  | 0.61938500  |
| C | 1.73377400  | -0.55160900 | -0.30974800 |
| C | 3.19977300  | -0.59566500 | 0.05973100  |
| F | -2.46392500 | -0.10566600 | 1.41037700  |

---

Table S77: Cartesian coordinates (Å) of TS162

---

| 0 | 1           |             |             |
|---|-------------|-------------|-------------|
| F | 2.57812900  | 1.97732700  | -0.14272500 |
| O | 3.98282200  | -1.36444300 | -0.56910700 |
| O | 2.86513100  | -0.22892300 | 1.12616400  |
| C | 2.15260300  | 0.79355000  | -0.45185400 |
| C | 3.36154400  | -0.71580000 | 0.15251800  |
| C | 0.66996000  | 0.76077000  | 0.00100500  |
| F | 0.49555600  | 1.06810400  | 1.28591700  |
| F | 0.07559100  | 1.70468000  | -0.75339300 |
| C | -0.00431500 | -0.57899100 | -0.33193500 |
| F | -0.06955800 | -0.68225000 | -1.65970700 |
| F | 0.74561400  | -1.58613100 | 0.13966500  |
| C | -1.41960900 | -0.78834500 | 0.25045000  |
| F | -1.32718100 | -0.92181700 | 1.57324700  |
| F | -1.88543800 | -1.92254500 | -0.27709900 |
| C | -2.44409900 | 0.32155500  | -0.04579300 |
| F | -3.64357200 | -0.10578100 | 0.30277200  |
| F | -2.44446700 | 0.61735300  | -1.33369300 |
| F | -2.15579900 | 1.40555900  | 0.65359500  |

---

Table S78: Cartesian coordinates ( $\text{\AA}$ ) of C5-perfluorinated aldehyde

---

| 0 | 1           |             |             |
|---|-------------|-------------|-------------|
| F | 1.66825400  | 1.28739100  | 1.21231500  |
| F | 0.47647200  | -0.49283100 | 1.62436200  |
| F | -0.92127500 | 1.66553000  | 1.06352500  |
| F | 0.09253900  | 1.92649800  | -0.84438200 |
| F | 2.97060300  | -0.70486100 | 0.31569300  |
| F | 1.25314900  | -1.64710600 | -0.56286000 |
| F | -2.35232000 | 0.91863000  | -1.01472100 |
| F | -0.80128100 | -0.45634800 | -1.68029500 |
| F | -1.28769000 | -2.06454800 | 0.24836100  |
| O | -2.85553500 | -0.74386100 | 1.05922600  |
| C | 0.91758200  | 0.33320800  | 0.66522500  |
| C | -0.31287400 | 1.03383000  | 0.05639900  |
| C | 1.81668100  | -0.48538000 | -0.28668800 |
| C | -1.36068500 | 0.12561300  | -0.61595600 |
| C | -1.94709600 | -0.92853500 | 0.33957800  |
| F | 2.03073000  | 0.17636200  | -1.40923600 |

---

Table S79: Cartesian coordinates (Å) of TS163

---

| 0 | 1           |             |             |
|---|-------------|-------------|-------------|
| F | 1.21196200  | -1.06325500 | 1.51488600  |
| F | 0.42894500  | -1.39784800 | -0.48541100 |
| F | -0.41369000 | 0.75750500  | 1.80641600  |
| F | 0.67649600  | 1.85093900  | 0.29357200  |
| F | 3.02890400  | -1.20285700 | -0.47832400 |
| F | 2.13255400  | 0.49717200  | -1.44617400 |
| F | -1.76192500 | 1.95523800  | -0.27153400 |
| F | -0.81896000 | 0.57231000  | -1.64127500 |
| F | -2.17661300 | -1.48100900 | -1.16502100 |
| O | -3.48059400 | 0.05662100  | 0.23606100  |
| C | 0.97231600  | -0.49151900 | 0.33817600  |
| C | 0.00463100  | 0.71956900  | 0.54127200  |
| C | 2.32595200  | -0.10042300 | -0.28412900 |
| C | -1.23050200 | 0.73717000  | -0.38895200 |
| C | -2.37205500 | -0.24200100 | 0.00068700  |
| O | -1.72889400 | -1.41114500 | 0.93516800  |
| H | -1.84415400 | -1.92636300 | -0.04888800 |
| H | -2.43380000 | -1.63297500 | 1.56006400  |
| F | 2.99808400  | 0.69611000  | 0.52582900  |

---

The optimized geometries of the key species observed in Figure S9 are given in Tables S80 – Table S86.

Table S80: Cartesian coordinates (Å) of Perfluoropentanoic acid

---

| 0 | 1           |             |             |
|---|-------------|-------------|-------------|
| F | -1.65845100 | -0.56235300 | -1.62562500 |
| F | -2.32724400 | -1.57447100 | 0.17880500  |
| O | -2.08857100 | 1.75730800  | -0.60548800 |
| O | -2.75699500 | 0.81739100  | 1.33025600  |
| C | -1.62812600 | -0.54183300 | -0.29189800 |
| C | -2.24279600 | 0.75791600  | 0.25871800  |
| H | -2.44548800 | 2.55585000  | -0.19100500 |
| C | -0.16984300 | -0.75348200 | 0.17534800  |
| F | -0.18463700 | -0.94052800 | 1.49552300  |
| F | 0.29692800  | -1.85193800 | -0.42411400 |
| C | 0.76644900  | 0.42770500  | -0.13403800 |
| F | 0.60632000  | 0.81928500  | -1.39827200 |
| F | 0.43679400  | 1.43421500  | 0.68641000  |
| C | 2.26016500  | 0.11378700  | 0.07669200  |
| F | 2.45410000  | -0.42095200 | 1.26940700  |
| F | 2.94361000  | 1.24139400  | -0.00947700 |
| F | 2.68757100  | -0.71998600 | -0.85222100 |

---

Table S81: Cartesian coordinates (Å) of TS51

---

| 0 | 1           |             |             |
|---|-------------|-------------|-------------|
| F | -1.68656600 | 0.09590400  | 1.90602700  |
| F | -2.31958000 | 1.56996800  | -0.11466100 |
| O | -2.68996600 | -1.56392700 | 0.49830100  |
| O | -2.11286700 | -0.74105200 | -1.58945100 |
| C | -1.62588200 | 0.50673100  | -0.06123700 |
| C | -2.25446600 | -0.80731100 | -0.36379000 |
| H | -2.16999700 | -0.72596200 | 1.60773100  |
| C | -0.12689200 | 0.80563100  | -0.21143400 |
| F | 0.04154400  | 1.46674400  | -1.35334700 |
| F | 0.21783600  | 1.60096200  | 0.80178100  |
| C | 0.75717600  | -0.45975800 | -0.21369600 |
| F | 0.27044800  | -1.33599900 | 0.67041600  |
| F | 0.73691600  | -0.99512700 | -1.42848600 |
| C | 2.22233000  | -0.15269600 | 0.15770200  |
| F | 2.64167300  | 0.89144200  | -0.53969800 |
| F | 2.96610900  | -1.20107600 | -0.13463700 |
| F | 2.32707200  | 0.10831700  | 1.44551600  |

---

Table S82: Cartesian coordinates (Å) of Perfluoro-3-Propyl- $\alpha$ -lactone

---

| 0 | 1           |             |             |
|---|-------------|-------------|-------------|
| F | -2.51256000 | -1.47549900 | -0.45847300 |
| O | -2.72509900 | 1.93805000  | -0.41612500 |
| O | -2.29594600 | 0.20779800  | 1.13263000  |
| C | -1.79360400 | -0.44152300 | -0.05588400 |
| C | -2.35406500 | 0.90037600  | -0.01403200 |
| C | -0.31092100 | -0.80565500 | 0.00505200  |
| F | -0.06882800 | -1.43326800 | 1.15941700  |
| F | -0.03961300 | -1.62927200 | -1.00788700 |
| C | 0.59695900  | 0.42866300  | -0.11097800 |
| F | 0.38857000  | 0.97202600  | -1.31269700 |
| F | 0.25417600  | 1.30961900  | 0.83526200  |
| C | 2.10174800  | 0.14005200  | 0.03795000  |
| F | 2.36284200  | -0.29740200 | 1.25548200  |
| F | 2.76548300  | 1.26203100  | -0.17116400 |
| F | 2.48633700  | -0.76359700 | -0.84490600 |

---

Table S83: Cartesian coordinates ( $\text{\AA}$ ) of TS151

---

| 0 | 1           |             |             |
|---|-------------|-------------|-------------|
| F | -1.73663300 | -1.16747200 | -1.20487800 |
| O | -3.07220200 | 1.82497800  | -0.22204100 |
| O | -2.78256200 | -0.64172500 | 0.74862900  |
| C | -1.79437000 | -0.45809100 | -0.05528800 |
| C | -2.41629300 | 0.90164900  | -0.23234800 |
| C | -0.36671100 | -0.40082200 | 0.54131100  |
| F | -0.34999000 | 0.61042500  | 1.42491500  |
| F | -0.13638800 | -1.54641500 | 1.17130100  |
| C | 0.72962200  | -0.15327900 | -0.50678600 |
| F | 0.95846900  | -1.27508600 | -1.18189200 |
| F | 0.28827800  | 0.79688500  | -1.34849200 |
| C | 2.06577400  | 0.32716900  | 0.09113800  |
| F | 1.95983100  | 1.56996200  | 0.52339300  |
| F | 2.99896500  | 0.27545200  | -0.84136400 |
| F | 2.40968800  | -0.45994900 | 1.09691900  |

---



Table S84: Cartesian coordinates (Å) of TS152

| 0 | 1           |             |             |  |
|---|-------------|-------------|-------------|--|
| F | 2.31372800  | 1.75265900  | -0.14349700 |  |
| O | 3.18108900  | -1.77507700 | -0.48371500 |  |
| O | 2.20746700  | -0.45129600 | 1.16309200  |  |
| C | 1.71356800  | 0.64681400  | -0.45122300 |  |
| C | 2.64900700  | -1.02490400 | 0.21061200  |  |
| C | 0.23254100  | 0.85731800  | -0.04562500 |  |
| F | 0.07286100  | 1.21389000  | 1.22995100  |  |
| F | -0.18330700 | 1.86808400  | -0.82713700 |  |
| C | -0.63650900 | -0.36849000 | -0.36855400 |  |
| F | -0.70246500 | -0.48650200 | -1.69482400 |  |
| F | -0.07725000 | -1.47534600 | 0.13824200  |  |
| C | -2.07180800 | -0.28004700 | 0.18165000  |  |
| F | -2.06593200 | -0.39337200 | 1.49665400  |  |
| F | -2.78808500 | -1.26386200 | -0.33202400 |  |
| F | -2.61724400 | 0.87632100  | -0.15582800 |  |

Table S85: Cartesian coordinates (Å) of C4-perfluorinated aldehyde

| 0 | 1           |             |             |  |
|---|-------------|-------------|-------------|--|
| F | -3.11200600 | -0.60400600 | -0.00045700 |  |
| O | -2.31607000 | 1.45102200  | -0.00002300 |  |
| C | -2.14262500 | 0.28943600  | -0.00014200 |  |
| C | -0.79337100 | -0.44642000 | 0.00019500  |  |
| F | -0.73284900 | -1.22019200 | 1.08764900  |  |
| F | -0.73263500 | -1.22092800 | -1.08672500 |  |
| C | 0.38846800  | 0.53274300  | 0.00001400  |  |
| F | 0.30658600  | 1.29107900  | -1.09373900 |  |
| F | 0.30672200  | 1.29116700  | 1.09374400  |  |
| C | 1.77334800  | -0.14219200 | -0.00008200 |  |
| F | 1.92094100  | -0.89230100 | 1.07720100  |  |
| F | 2.69715000  | 0.80139300  | 0.00016600  |  |
| F | 1.92093900  | -0.89172100 | -1.07780900 |  |

Table S86: Cartesian coordinates ( $\text{\AA}$ ) of TS153

---

| 0 | 1           |             |             |
|---|-------------|-------------|-------------|
| F | 1.89504800  | -1.23352800 | 0.97214800  |
| F | 0.91808500  | -1.31502100 | -0.94206900 |
| F | 0.53574100  | 0.71078900  | 1.65247400  |
| F | 1.33065000  | 1.81025500  | -0.03695600 |
| F | -1.19435100 | 1.98526100  | 0.00518300  |
| F | -0.58562500 | 0.71869800  | -1.63848200 |
| F | -1.79854000 | -1.38755200 | -1.04078900 |
| O | -2.79908200 | 0.03282600  | 0.69414500  |
| C | 1.56691300  | -0.52767900 | -0.09276400 |
| C | 0.68711200  | 0.70088300  | 0.32630400  |
| C | -0.71541500 | 0.78190500  | -0.31859200 |
| C | -1.76024900 | -0.23049000 | 0.22147400  |
| O | -0.93392400 | -1.45111900 | 0.92483000  |
| H | -1.24873300 | -1.90087300 | -0.04707000 |
| H | -1.48937100 | -1.72818200 | 1.66702900  |
| F | 2.66921200  | -0.10804800 | -0.68154300 |

---

The optimized geometries of the key species observed in Figure S10 are given in Tables S87 – Table S93.

Table S87: Cartesian coordinates (Å) of Perfluorobutanoic acid

| 0 | 1           |             |             |  |
|---|-------------|-------------|-------------|--|
| F | -0.89681500 | 0.52482200  | 1.64879600  |  |
| F | -1.59449500 | 1.67304100  | -0.06808600 |  |
| O | -1.62653200 | -1.72301800 | 0.55549700  |  |
| O | -2.12581600 | -0.66658600 | -1.34425400 |  |
| C | -0.93354400 | 0.58228900  | 0.29996900  |  |
| C | -1.64392100 | -0.67108800 | -0.26029300 |  |
| H | -1.22856600 | -1.48865100 | 1.40387400  |  |
| C | 0.51671900  | 0.73073900  | -0.20188800 |  |
| F | 0.49228100  | 1.02393800  | -1.49932800 |  |
| F | 1.09218200  | 1.72564900  | 0.47423700  |  |
| C | 1.36998300  | -0.53512000 | -0.01894200 |  |
| F | 1.26686500  | -0.98195900 | 1.22899700  |  |
| F | 0.94095000  | -1.47956900 | -0.84001600 |  |
| F | 2.63146800  | -0.26763600 | -0.27870100 |  |

Table S88: Cartesian coordinates (Å) of TS41

| 0 | 1           |             |             |
|---|-------------|-------------|-------------|
| F | -1.27060900 | 0.31698600  | 1.79543700  |
| F | -1.52668300 | 1.67320100  | -0.37911900 |
| O | -2.18385300 | -1.39845300 | 0.39425300  |
| O | -1.38464700 | -0.72807100 | -1.67470000 |
| C | -0.93871500 | 0.56591100  | -0.17364100 |
| C | -1.63304600 | -0.71666400 | -0.46487000 |
| H | -1.75542100 | -0.50399600 | 1.49940100  |
| C | 0.58641800  | 0.72832000  | -0.14740400 |
| F | 0.96458500  | 1.24433100  | -1.31458500 |
| F | 0.87877400  | 1.58559600  | 0.82594400  |
| C | 1.35585800  | -0.58491900 | 0.09460200  |
| F | 1.29700900  | -1.35135300 | -0.97416900 |
| F | 2.61344000  | -0.28879700 | 0.35571500  |
| F | 0.83018700  | -1.22881900 | 1.12322700  |

Table S89: Cartesian coordinates (Å) of Perfluoro-3-Ethyl- $\alpha$ -lactone

| 0 | 1           |             |             |
|---|-------------|-------------|-------------|
| F | 1.64709600  | 1.73221700  | 0.06373600  |
| O | 2.47161200  | -1.49752800 | -0.63950200 |
| O | 1.45039100  | -0.32872300 | 1.14001100  |
| C | 1.06111100  | 0.54661700  | 0.05539000  |
| C | 1.83921100  | -0.67035500 | -0.09942200 |
| C | -0.43240300 | 0.70632500  | -0.17282600 |
| F | -0.89961200 | 1.65064200  | 0.64591800  |
| F | -0.62162500 | 1.09375800  | -1.43686700 |
| C | -1.24290900 | -0.57808500 | 0.06631300  |
| F | -1.27652600 | -0.86783100 | 1.35161800  |
| F | -2.47218700 | -0.40476700 | -0.37521600 |
| F | -0.68004400 | -1.58368600 | -0.59372100 |

Table S90: Cartesian coordinates ( $\text{\AA}$ ) of TS141

---

| 0 | 1           |             |             |
|---|-------------|-------------|-------------|
| F | 1.72824800  | 1.62811900  | 0.03007200  |
| O | 2.39902200  | -1.64344900 | -0.53851700 |
| O | 1.31168200  | -0.15752900 | 1.38478200  |
| C | 1.07992100  | 0.46719700  | 0.27775200  |
| C | 1.79543100  | -0.70903900 | -0.32227900 |
| C | -0.36865000 | 0.68222500  | -0.21541100 |
| F | -0.86175100 | 1.76531700  | 0.37767400  |
| F | -0.35217900 | 0.86101500  | -1.54159100 |
| C | -1.28303700 | -0.51017700 | 0.09181100  |
| F | -1.49920900 | -0.62137500 | 1.38237300  |
| F | -2.43493000 | -0.36323500 | -0.53496700 |
| F | -0.69435900 | -1.62244200 | -0.35371300 |

---

Table S91: Cartesian coordinates ( $\text{\AA}$ ) of TS142

---

| 0 | 1           |             |             |
|---|-------------|-------------|-------------|
| F | 1.19143900  | 2.05542000  | 0.03270400  |
| O | 2.87449400  | -1.07757300 | -0.68159000 |
| O | 1.53924900  | -0.32685200 | 1.06802700  |
| C | 0.86959600  | 0.89280400  | -0.42876200 |
| C | 2.14176000  | -0.60224000 | 0.07146400  |
| C | -0.62673000 | 0.70420000  | -0.09628300 |
| F | -1.00741400 | 1.35335200  | 1.00233500  |
| F | -1.23588800 | 1.26235700  | -1.15862200 |
| C | -1.10012500 | -0.76134600 | 0.00584000  |
| F | -0.35888100 | -1.53371900 | -0.78209700 |
| F | -1.00988400 | -1.20114100 | 1.24476200  |
| F | -2.35903300 | -0.84350400 | -0.38408900 |

---

Table S92: Cartesian coordinates (Å) of C3-perfluorinated aldehyde

| 0 | 1           |             |             |  |
|---|-------------|-------------|-------------|--|
| F | -2.52535100 | -0.20039100 | 0.00018700  |  |
| O | -1.32549100 | 1.64852300  | -0.00003500 |  |
| C | -1.39419800 | 0.47537600  | 0.00012700  |  |
| C | -0.21901300 | -0.50836900 | -0.00010400 |  |
| F | -0.29866200 | -1.27887500 | 1.08709200  |  |
| F | -0.29894800 | -1.27839800 | -1.08753700 |  |
| C | 1.14215500  | 0.19813500  | 0.00002800  |  |
| F | 1.25884900  | 0.94847600  | 1.07966600  |  |
| F | 2.09730900  | -0.71505300 | -0.00003600 |  |
| F | 1.25905500  | 0.94879300  | -1.07937600 |  |

Table S93: Cartesian coordinates (Å) of TS143

| 0 | 1           |             |             |  |
|---|-------------|-------------|-------------|--|
| F | 1.36459100  | 0.72002900  | -1.29721500 |  |
| F | 2.33217800  | -0.28039800 | 0.34106200  |  |
| F | 0.29893000  | -1.62858400 | -0.89143400 |  |
| F | 0.11741200  | -1.28253900 | 1.24410000  |  |
| F | -1.51861900 | 0.73854500  | 1.25857500  |  |
| O | -2.29655000 | -0.82542300 | -0.48515800 |  |
| C | 1.21860400  | 0.31638100  | -0.04677900 |  |
| C | 0.06840500  | -0.70579900 | 0.04726900  |  |
| C | -1.36237200 | -0.18839400 | -0.17640600 |  |
| O | -1.25800200 | 1.30559400  | -0.80353000 |  |
| H | -1.44937900 | 1.51912000  | 0.26635400  |  |
| H | -2.06276200 | 1.39923900  | -1.33380100 |  |
| F | 1.00559000  | 1.36707400  | 0.72629400  |  |

The optimized geometries of the key species observed in Figure S13 are given in Tables S94 – Table S103.

Table S94: Cartesian coordinates (Å) of Pentafluoropropionic acid

| 0 | 1           |             |             |  |
|---|-------------|-------------|-------------|--|
| F | -0.05762300 | 1.75942900  | -0.16288200 |  |
| F | -0.07856400 | 0.54954700  | 1.64997200  |  |
| F | 0.94567400  | -0.44033400 | -1.51412500 |  |
| F | 1.12770000  | -1.45363400 | 0.37886500  |  |
| F | 2.17531500  | 0.39537800  | 0.04825100  |  |
| O | -1.68054000 | -1.25681100 | 0.47529100  |  |
| O | -2.20753100 | 0.42631800  | -0.92511400 |  |
| C | -0.14560200 | 0.52256700  | 0.31419400  |  |
| C | 1.06440700  | -0.27089500 | -0.20469900 |  |
| C | -1.48307300 | -0.09096000 | -0.13621500 |  |
| H | -2.52234000 | -1.61380000 | 0.15816900  |  |

Table S95: Cartesian coordinates (Å) of TS1E

| 0 | 1           |             |             |  |
|---|-------------|-------------|-------------|--|
| O | -1.19471300 | -1.73240400 | 0.02214100  |  |
| O | -2.33647500 | 0.19111500  | -0.58350100 |  |
| H | -1.54186300 | 1.42335100  | -0.36303200 |  |
| C | -0.22051500 | -0.02627400 | 0.51461100  |  |
| F | -0.09650300 | 0.07300500  | 1.77270100  |  |
| F | -0.69989900 | 1.85241700  | -0.03854600 |  |
| C | -1.46754800 | -0.53462900 | -0.10970800 |  |
| C | 1.11643600  | -0.07959300 | -0.23220900 |  |
| F | 1.85138900  | 0.95161200  | 0.12925600  |  |
| F | 0.88831100  | -0.04569700 | -1.52516000 |  |
| F | 1.74793800  | -1.19245500 | 0.08594300  |  |

Table S96: Cartesian coordinates ( $\text{\AA}$ ) of TS2E

---

| 0 | 1           |             |             |
|---|-------------|-------------|-------------|
| O | 2.24566000  | -0.70632000 | -0.87746300 |
| O | 2.07846900  | 0.12096000  | 1.29848700  |
| H | 1.03345400  | 0.57123600  | 0.99869800  |
| C | -0.01928000 | 0.66674000  | -0.14423700 |
| F | -0.50056100 | 1.82517500  | 0.37607800  |
| F | 0.10146900  | 0.83050800  | -1.47042100 |
| C | 1.92824400  | -0.21347700 | 0.10848500  |
| C | -1.07016700 | -0.40627300 | 0.10112000  |
| F | -1.27924100 | -0.52065300 | 1.40946100  |
| F | -2.22021200 | -0.13668500 | -0.49135600 |
| F | -0.61915100 | -1.57282300 | -0.35255000 |

---

Table S97: Cartesian coordinates ( $\text{\AA}$ ) of TS3E

---

| 0 | 1           |             |             |
|---|-------------|-------------|-------------|
| F | -0.21252600 | 1.77837800  | 0.25919300  |
| F | 0.91783100  | 0.00675700  | -1.14502700 |
| F | -2.15965600 | -0.01482100 | 1.06547500  |
| F | -1.10707000 | -1.49281300 | -0.10133700 |
| F | -1.86389100 | 0.28463400  | -1.05011300 |
| O | 1.76798100  | -1.37453600 | 0.35194500  |
| O | 2.58458500  | 0.74788200  | 0.22870700  |
| C | -0.02277600 | 0.52551200  | 0.43650400  |
| C | -1.32068200 | -0.20519000 | 0.05041300  |
| C | 1.75662400  | -0.07719400 | 0.04136300  |
| H | 2.52827400  | -1.50476000 | 0.93140200  |

---



Table S98: Cartesian coordinates (Å) of TS4E

---

| 0 | 1           |             |             |
|---|-------------|-------------|-------------|
| O | 2.55242300  | -0.08929600 | -0.14819000 |
| O | 1.23817500  | 1.75880500  | 0.10738800  |
| H | -0.10017500 | 1.90799900  | -0.01063500 |
| C | 0.20380100  | -0.69451600 | 0.03634200  |
| F | 0.47636100  | -1.31160000 | 1.19255500  |
| F | 0.49125900  | -1.47457200 | -1.00718800 |
| C | -1.16401900 | -0.27328700 | -0.00443000 |
| F | -1.82149400 | -0.27985900 | -1.08506900 |
| F | -1.08879700 | 1.76621400  | -0.12132100 |
| F | -1.84823500 | -0.15392200 | 1.05319900  |
| C | 1.60914000  | 0.60440000  | -0.02399900 |

---

Table S99: Cartesian coordinates (Å) of Perfluoro-3-Methyl- $\alpha$ -lactone

---

| 0 | 1           |             |             |
|---|-------------|-------------|-------------|
| O | -1.14747700 | 0.21566300  | 1.12407900  |
| O | -2.58521700 | -0.67971000 | -0.51980100 |
| C | -0.33558000 | 0.48766000  | -0.03971000 |
| F | -0.17585600 | 1.76550800  | -0.32821700 |
| C | -1.63106600 | -0.16925900 | -0.06614000 |
| C | 0.99034800  | -0.25035400 | -0.03910300 |
| F | 1.58564500  | -0.10428000 | -1.20961600 |
| F | 0.78383600  | -1.53474100 | 0.19226800  |
| F | 1.77519100  | 0.24063500  | 0.90506400  |

---

Table S100: Cartesian coordinates ( $\text{\AA}$ ) of TS1E1

| 0 | 1           |             |             |  |
|---|-------------|-------------|-------------|--|
| F | 0.74320900  | -1.50368500 | -0.39258600 |  |
| F | 1.36225000  | -0.29121700 | 1.27314700  |  |
| F | -0.21144000 | 1.67701200  | 0.58147900  |  |
| O | -2.57477400 | -0.79165300 | 0.32890200  |  |
| O | -0.94629600 | 0.57556200  | -1.26880600 |  |
| C | 0.95588700  | -0.25953200 | 0.01429400  |  |
| C | -0.35455800 | 0.53965200  | -0.12649000 |  |
| C | -1.57466500 | -0.26096200 | 0.27455900  |  |
| F | 1.88471200  | 0.29719800  | -0.73481300 |  |

Table S101: Cartesian coordinates ( $\text{\AA}$ ) of TS1E2

| 0 | 1           |             |             |  |
|---|-------------|-------------|-------------|--|
| F | -0.10751600 | 1.80826900  | -0.09241700 |  |
| O | 2.81261400  | -0.35382900 | -0.65576500 |  |
| O | 1.28092200  | -0.07650100 | 1.07186200  |  |
| C | 0.15947700  | 0.60450300  | -0.47887400 |  |
| C | 1.94843200  | -0.16154700 | 0.08349400  |  |
| C | -1.04497400 | -0.26453300 | -0.06880500 |  |
| F | -1.97563600 | -0.04268300 | -0.99430500 |  |
| F | -1.54709900 | 0.04092200  | 1.11417600  |  |
| F | -0.71707100 | -1.54294100 | -0.08786100 |  |

Table S102: Cartesian coordinates ( $\text{\AA}$ ) of perfluoroacetyl fluoride

| 0 | 1           |             |             |  |
|---|-------------|-------------|-------------|--|
| O | 1.55594800  | 1.15069100  | 0.00005000  |  |
| C | 0.94222200  | 0.15069900  | -0.00002600 |  |
| F | 1.47685800  | -1.05407600 | -0.00009200 |  |
| C | -0.58869700 | 0.02073900  | -0.00005000 |  |
| F | -0.97636000 | -0.64629600 | -1.07607800 |  |
| F | -1.14321300 | 1.21158600  | 0.00113900  |  |
| F | -0.97603400 | -0.64834100 | 1.07503800  |  |

Table S103: Cartesian coordinates (Å) of TS1E3

---

| 0 | 1           |             |             |
|---|-------------|-------------|-------------|
| F | -1.44558300 | -0.75606500 | -0.89492300 |
| F | -0.87572200 | 1.27275300  | -0.47644400 |
| F | 1.25171500  | 0.88278000  | 0.95648900  |
| O | 1.00371200  | -1.52391100 | 0.43876300  |
| C | -0.81265500 | 0.03196600  | -0.03747700 |
| C | 0.62849600  | -0.46798800 | 0.09653400  |
| O | 1.43337500  | 0.26066600  | -1.10569200 |
| H | 1.66465300  | 0.91375400  | -0.24327000 |
| H | 2.17173700  | -0.33736000 | -1.29232800 |
| F | -1.40020200 | -0.04994500 | 1.13895500  |

---

The optimized geometries of the key species observed in Figure 8 and Figure 12 (article) are given in Tables S104 – Table S116.

Table S104: Cartesian coordinates ( $\text{\AA}$ ) of trifluoroacetic acid (TFA)

---

|   |             |             |             |
|---|-------------|-------------|-------------|
| 0 | 1           |             |             |
| F | -0.98626600 | -0.67272100 | -1.07545800 |
| F | -1.17922600 | 1.18135800  | -0.00017400 |
| F | -0.98658100 | -0.67254800 | 1.07546600  |
| O | 1.50576800  | -1.03826600 | 0.00001200  |
| O | 1.48489400  | 1.21436700  | 0.00000100  |
| C | -0.60050600 | 0.00010700  | 0.00000500  |
| C | 0.93044300  | 0.16146100  | 0.00024000  |
| H | 2.46375100  | -0.90301100 | -0.00008400 |

---

Table S105: Cartesian coordinates ( $\text{\AA}$ ) of TS1M

---

|   |             |             |             |
|---|-------------|-------------|-------------|
| 0 | 1           |             |             |
| F | 0.91707800  | -0.90766400 | 1.04804700  |
| F | 1.17081200  | 1.59335300  | 0.00001100  |
| F | 0.91701900  | -0.90762000 | -1.04809000 |
| O | -1.29030800 | 1.29319900  | 0.00000300  |
| O | -1.61212400 | -0.99172900 | 0.00001600  |
| C | 0.36737800  | -0.47283400 | 0.00000400  |
| C | -1.04447400 | 0.10171500  | 0.00001600  |
| H | 0.23784500  | 1.81233400  | 0.00001100  |

---

Table S106: Cartesian coordinates ( $\text{\AA}$ ) of TS2M

|   |   |             |             |             |
|---|---|-------------|-------------|-------------|
| 0 | 1 |             |             |             |
| F |   | -1.21555100 | -0.75581000 | -1.03592200 |
| F |   | -0.98445600 | 1.59270100  | 0.00008900  |
| F |   | -1.21542500 | -0.75585100 | 1.03591800  |
| O |   | 1.39683000  | 1.15490700  | -0.00007300 |
| O |   | 1.87246100  | -1.09117100 | 0.00003800  |
| C |   | -0.55202400 | -0.43748300 | -0.00004000 |
| C |   | 1.31948300  | -0.05056500 | -0.00003800 |
| H |   | -0.02019300 | 1.68905100  | -0.00001400 |

Table S107: Cartesian coordinates ( $\text{\AA}$ ) of TS3M

|   |   |             |             |             |
|---|---|-------------|-------------|-------------|
| 0 | 1 |             |             |             |
| F |   | -0.91570600 | 0.72477900  | -1.07530600 |
| F |   | -0.91497300 | 0.72327300  | 1.07637700  |
| F |   | -1.63043800 | -1.00125200 | -0.00050800 |
| O |   | 1.55711100  | -1.30491800 | -0.00026000 |
| O |   | 1.76812900  | 1.01699400  | -0.00013800 |
| C |   | -0.69680700 | -0.02834600 | -0.00006600 |
| C |   | 1.39183900  | -0.07017600 | -0.00004100 |
| H |   | 0.37794200  | -1.12667400 | -0.00124400 |

Table S108: Cartesian coordinates ( $\text{\AA}$ ) of TS4M

|   |   |             |             |             |
|---|---|-------------|-------------|-------------|
| 0 | 1 |             |             |             |
| F |   | -1.50520000 | -1.06910300 | -0.14699500 |
| F |   | -1.56051200 | 1.00834400  | -0.18985100 |
| F |   | 0.33869800  | 0.01870100  | 1.31248400  |
| O |   | 1.37090200  | -1.10219100 | -0.33341700 |
| O |   | 1.38067900  | 1.17549100  | -0.38655200 |
| C |   | -0.82351800 | -0.01253500 | -0.29633200 |
| C |   | 0.88419000  | 0.13627900  | -0.06453200 |
| H |   | 2.16645700  | -0.95034300 | -0.85581000 |

Table S109: Cartesian coordinates ( $\text{\AA}$ ) of TS5M

---

| 0 | 1           |             |             |
|---|-------------|-------------|-------------|
| F | 0.90669100  | 1.26561600  | -0.47742900 |
| F | 1.44195200  | -0.73144800 | -0.71933200 |
| F | 1.03021100  | -0.02905200 | 1.26269400  |
| O | -2.41166700 | 0.34606400  | -0.04465400 |
| O | -0.68661300 | -1.01001600 | -0.10409500 |
| C | 0.66485500  | 0.05589900  | 0.01607200  |
| C | -1.13541900 | 0.15463000  | 0.14283200  |
| H | -2.80006600 | -0.49760300 | -0.35683100 |

---

Table S110: Cartesian coordinates ( $\text{\AA}$ ) of Difluoroacetolactone

---

| 0 | 1           |             |             |
|---|-------------|-------------|-------------|
| F | 1.21626100  | 1.07255200  | -0.23981800 |
| F | 1.21626000  | -1.07255300 | -0.23981600 |
| O | -2.06842500 | -0.00000100 | -0.46934300 |
| O | -0.30930100 | 0.00000100  | 1.11368500  |
| C | 0.48530000  | 0.00000000  | -0.06534500 |
| C | -0.96378000 | 0.00000000  | -0.07432700 |

---

Table S111: Cartesian coordinates ( $\text{\AA}$ ) of TS1M1

---

| 0 | 1           |             |             |
|---|-------------|-------------|-------------|
| F | -1.13378200 | -1.06702900 | -0.35149200 |
| F | -1.13378500 | 1.06702500  | -0.35149800 |
| O | 2.12967900  | 0.00000000  | -0.32762500 |
| O | 0.02802200  | 0.00000400  | 1.26086400  |
| C | -0.47011800 | 0.00000000  | 0.08435700  |
| C | 0.99453600  | 0.00000100  | -0.27419300 |

---

Table S112: Cartesian coordinates ( $\text{\AA}$ ) of TS1M2

---

|   |             |             |             |
|---|-------------|-------------|-------------|
| 0 | 1           |             |             |
| F | -1.33491800 | -1.04023600 | -0.12692200 |
| F | -1.33483800 | 1.04078700  | -0.12336400 |
| O | 1.96138500  | 0.00141900  | -0.72299500 |
| O | 0.68861600  | -0.00239500 | 1.21083000  |
| C | -0.62206700 | 0.00061300  | -0.33727700 |
| C | 1.09336600  | -0.00013900 | 0.06225900  |

---

Table S113: Cartesian coordinates ( $\text{\AA}$ ) of carbonyl fluoride

---

|   |            |             |             |
|---|------------|-------------|-------------|
| 0 | 1          |             |             |
| F | 0.00000000 | 1.05442500  | -0.62756700 |
| F | 0.00000000 | -1.05442500 | -0.62756700 |
| O | 0.00000000 | 0.00000000  | 1.30825300  |
| C | 0.00000000 | 0.00000000  | 0.13836300  |

---

Table S114: Cartesian coordinates ( $\text{\AA}$ ) of TS1M3

---

|   |             |             |             |
|---|-------------|-------------|-------------|
| 0 | 1           |             |             |
| F | 0.60558800  | 0.80661500  | 0.90199600  |
| F | -0.86934300 | -0.92961800 | 0.61267000  |
| O | 1.15511600  | -0.64578000 | -0.70020300 |
| C | 0.37600600  | -0.03274100 | -0.08580700 |
| O | -0.84747300 | 0.63287000  | -0.85087600 |
| H | -1.36047500 | -0.11967200 | -0.20232600 |
| H | -0.98289800 | 1.52641700  | -0.50619400 |

---

Table S115: Cartesian coordinates ( $\text{\AA}$ ) of perfluoro-formic acid

---

| 0 | 1 |             |             |             |
|---|---|-------------|-------------|-------------|
| F |   | 0.17180600  | 1.21852700  | 0.00001000  |
| O |   | 0.95322500  | -0.81579300 | -0.00002300 |
| O |   | -1.25351300 | -0.46784600 | 0.00009500  |
| C |   | -0.14546200 | -0.07571000 | -0.00010100 |
| H |   | 1.72882200  | -0.24337600 | -0.00006100 |

---

Table S116: Cartesian coordinates ( $\text{\AA}$ ) of TS1M4

---

| 0 | 1 |             |             |             |
|---|---|-------------|-------------|-------------|
| F |   | -1.03635200 | -0.82456800 | 0.00000200  |
| O |   | -0.33902400 | 1.16765300  | 0.00000200  |
| O |   | 1.38312600  | -0.39459200 | -0.00000300 |
| C |   | 0.36489500  | 0.14185400  | 0.00000500  |
| H |   | -1.21502000 | 0.38550300  | -0.00004200 |

---
