# Supplementary figures and images for: Thermal decomposition mechanism and kinetics of perfluorooctanoic acid (PFOA) and other perfluorinated carboxylic acids: a theoretical study
Source: Royal Society of Chemistry journal article supplement (doi:10.1039/d2em00259k), 2022-01-01

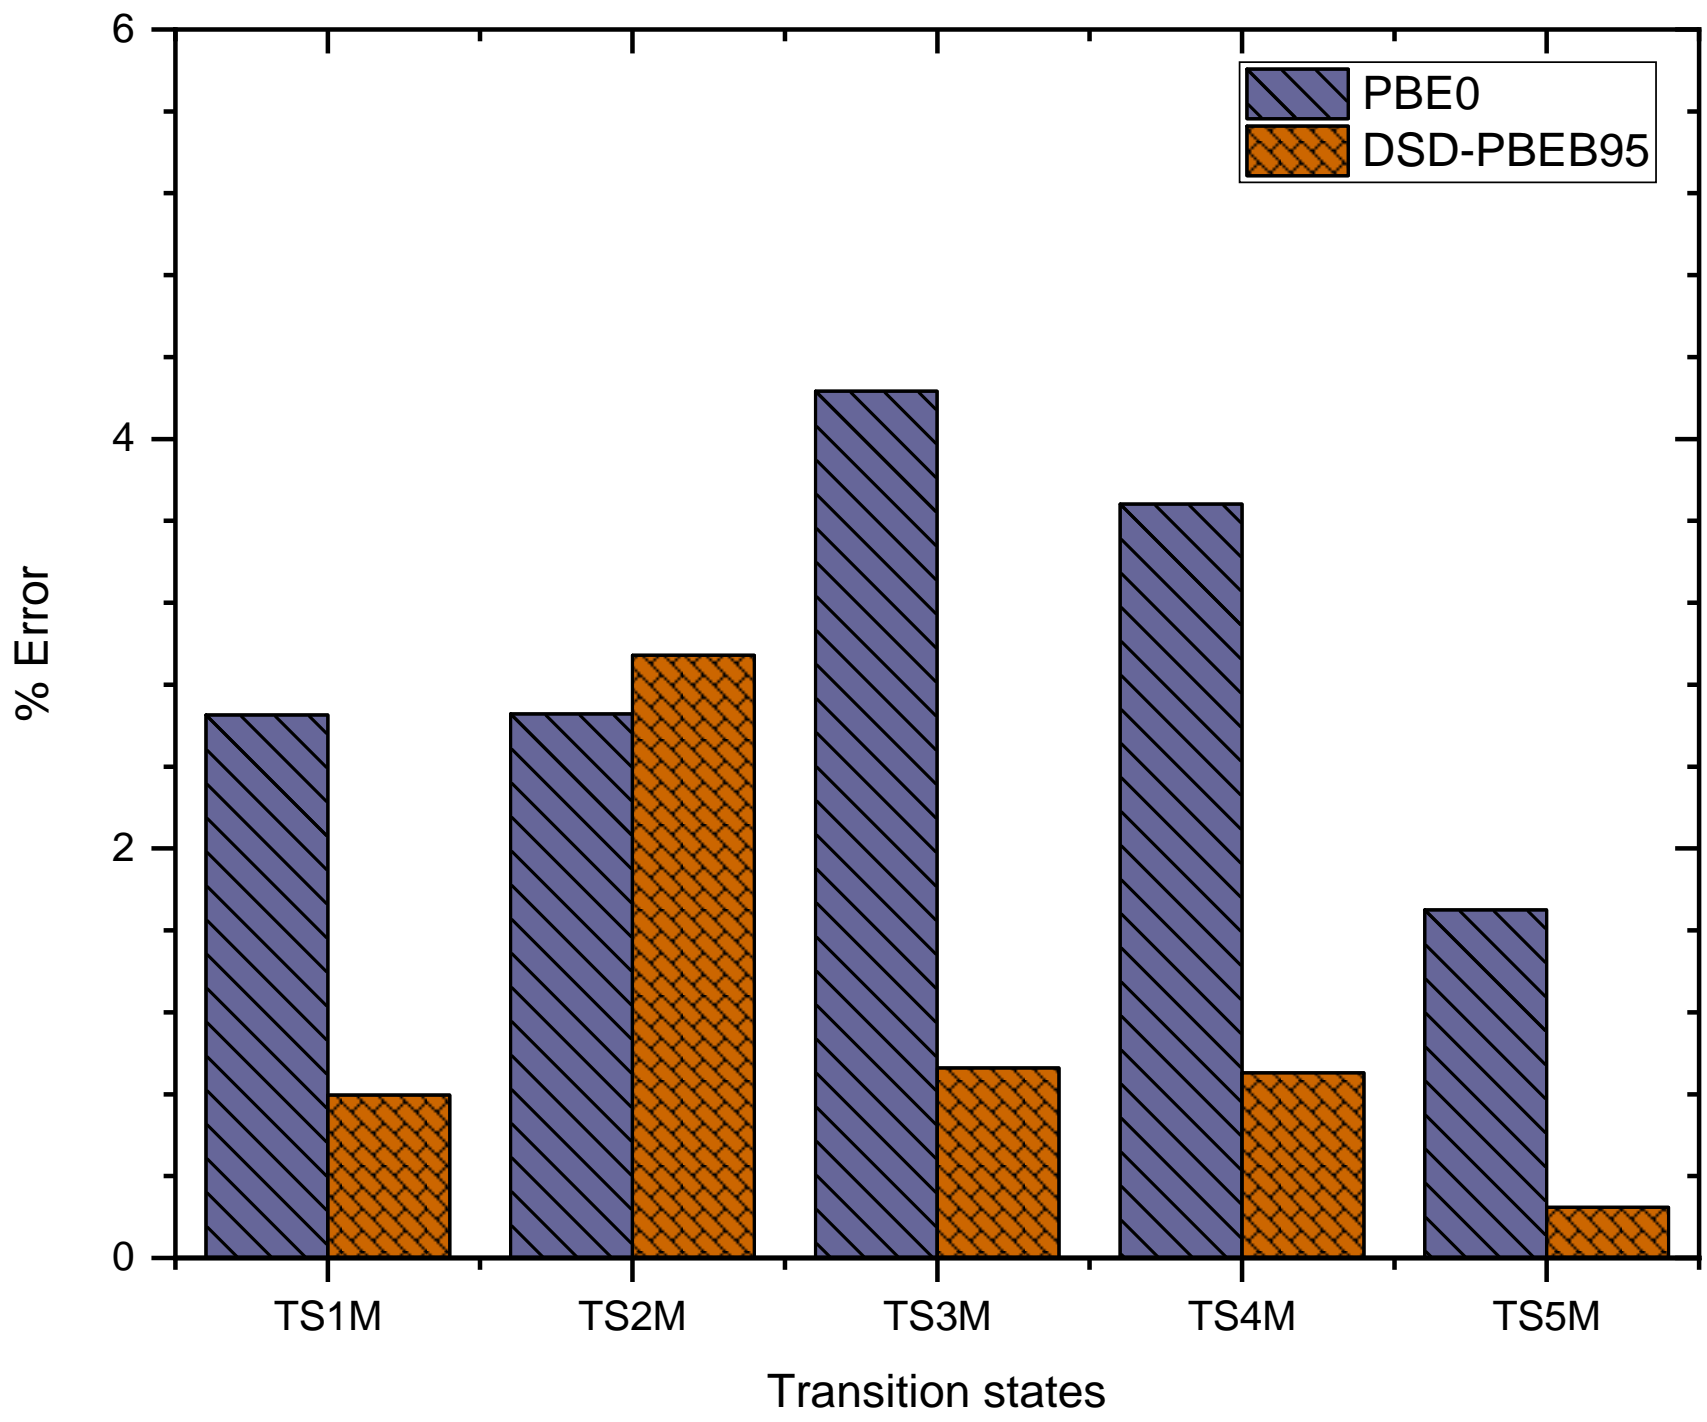

Supplement: d2em00259k2.zip [file d2em00259k2.zip]

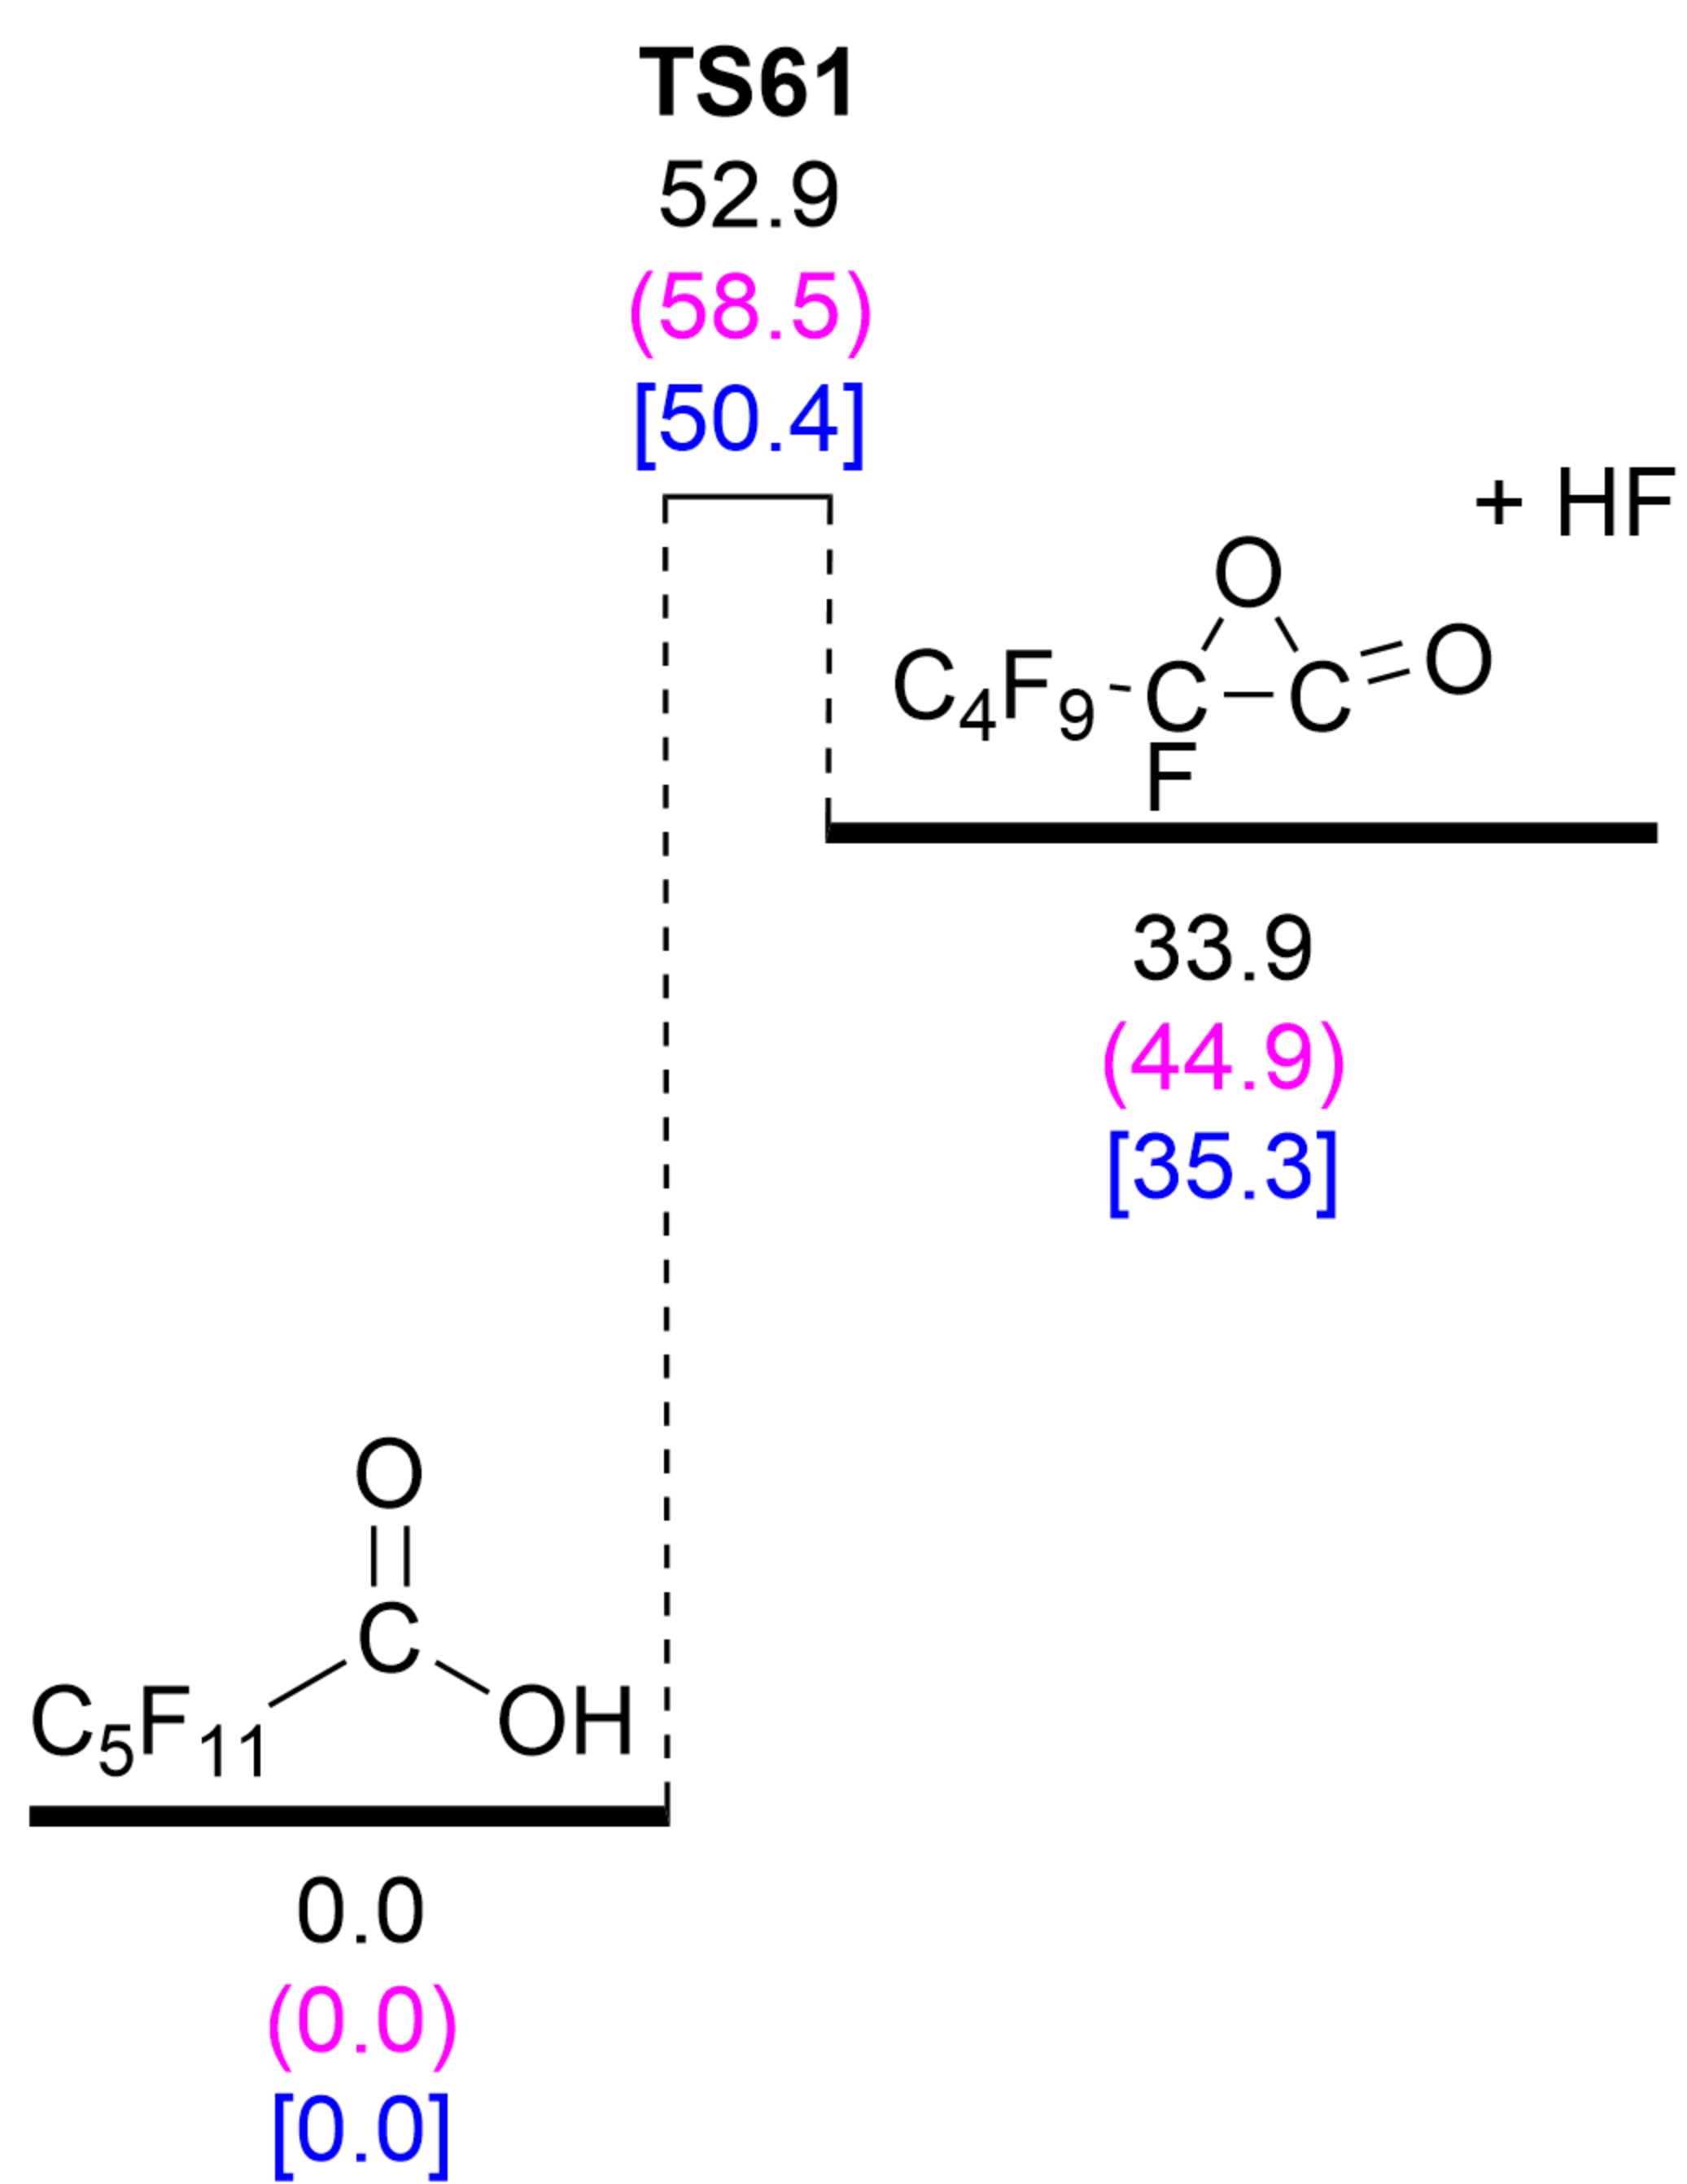

(a)

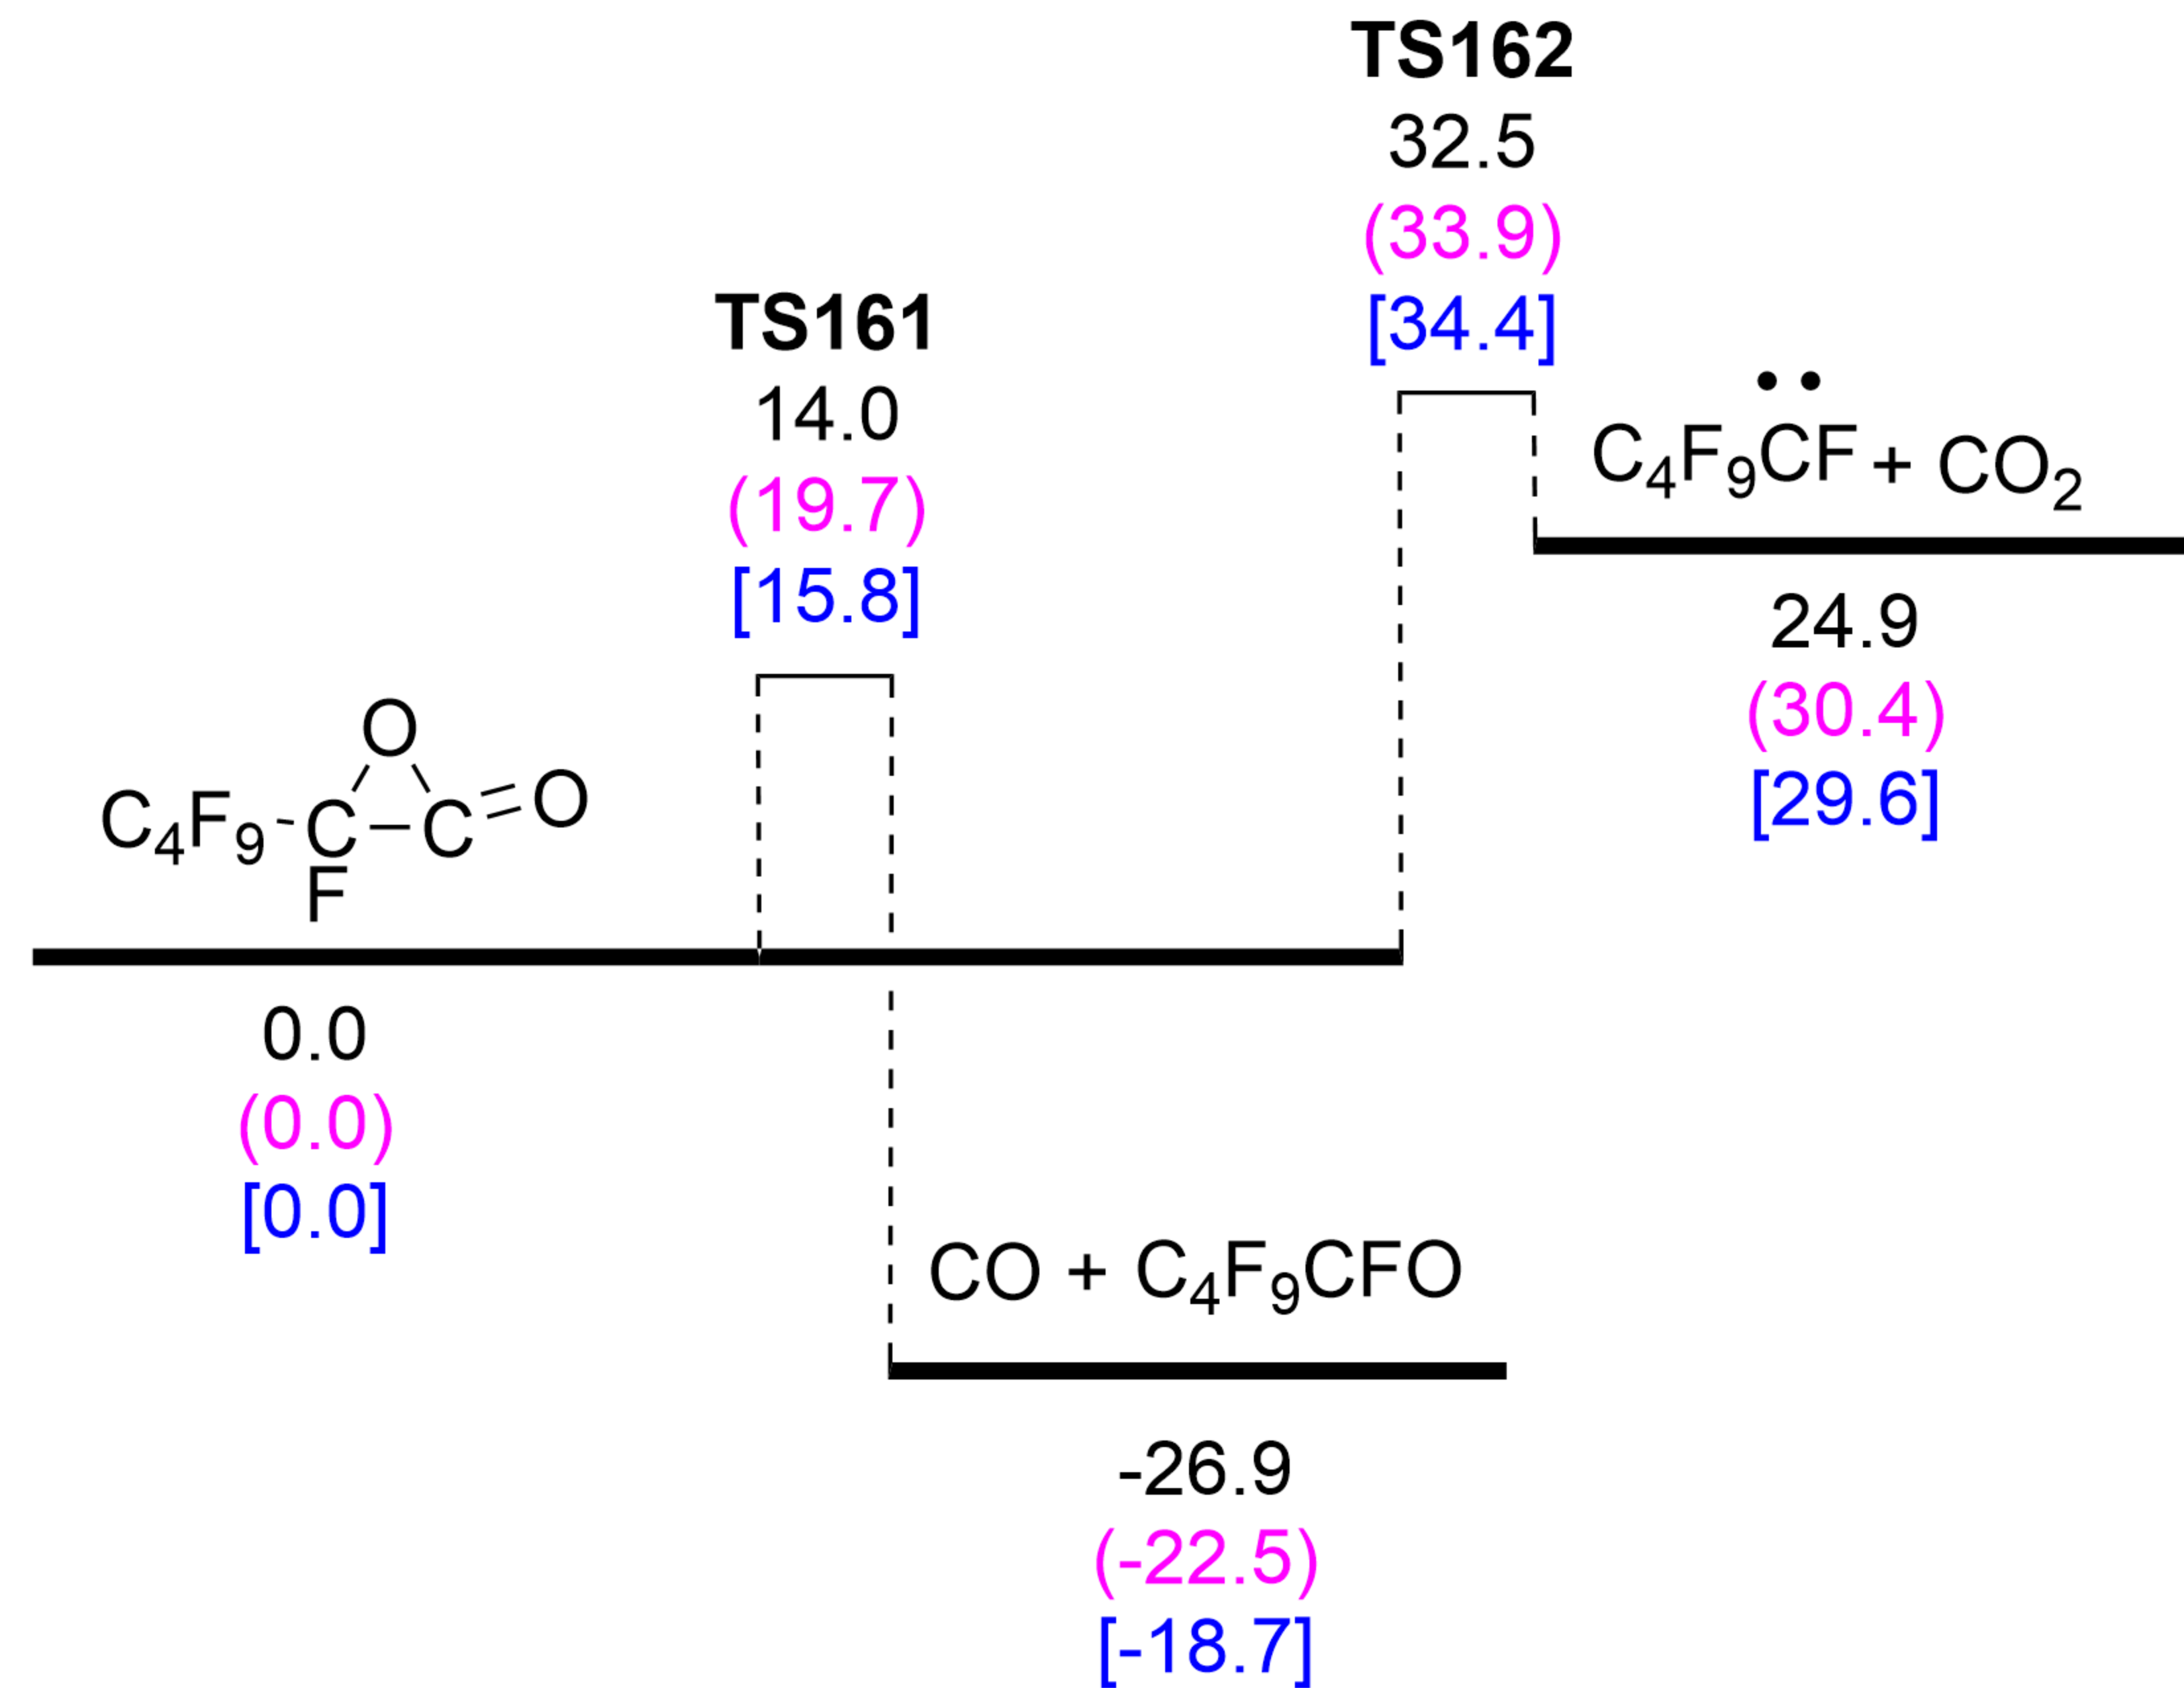

(b)

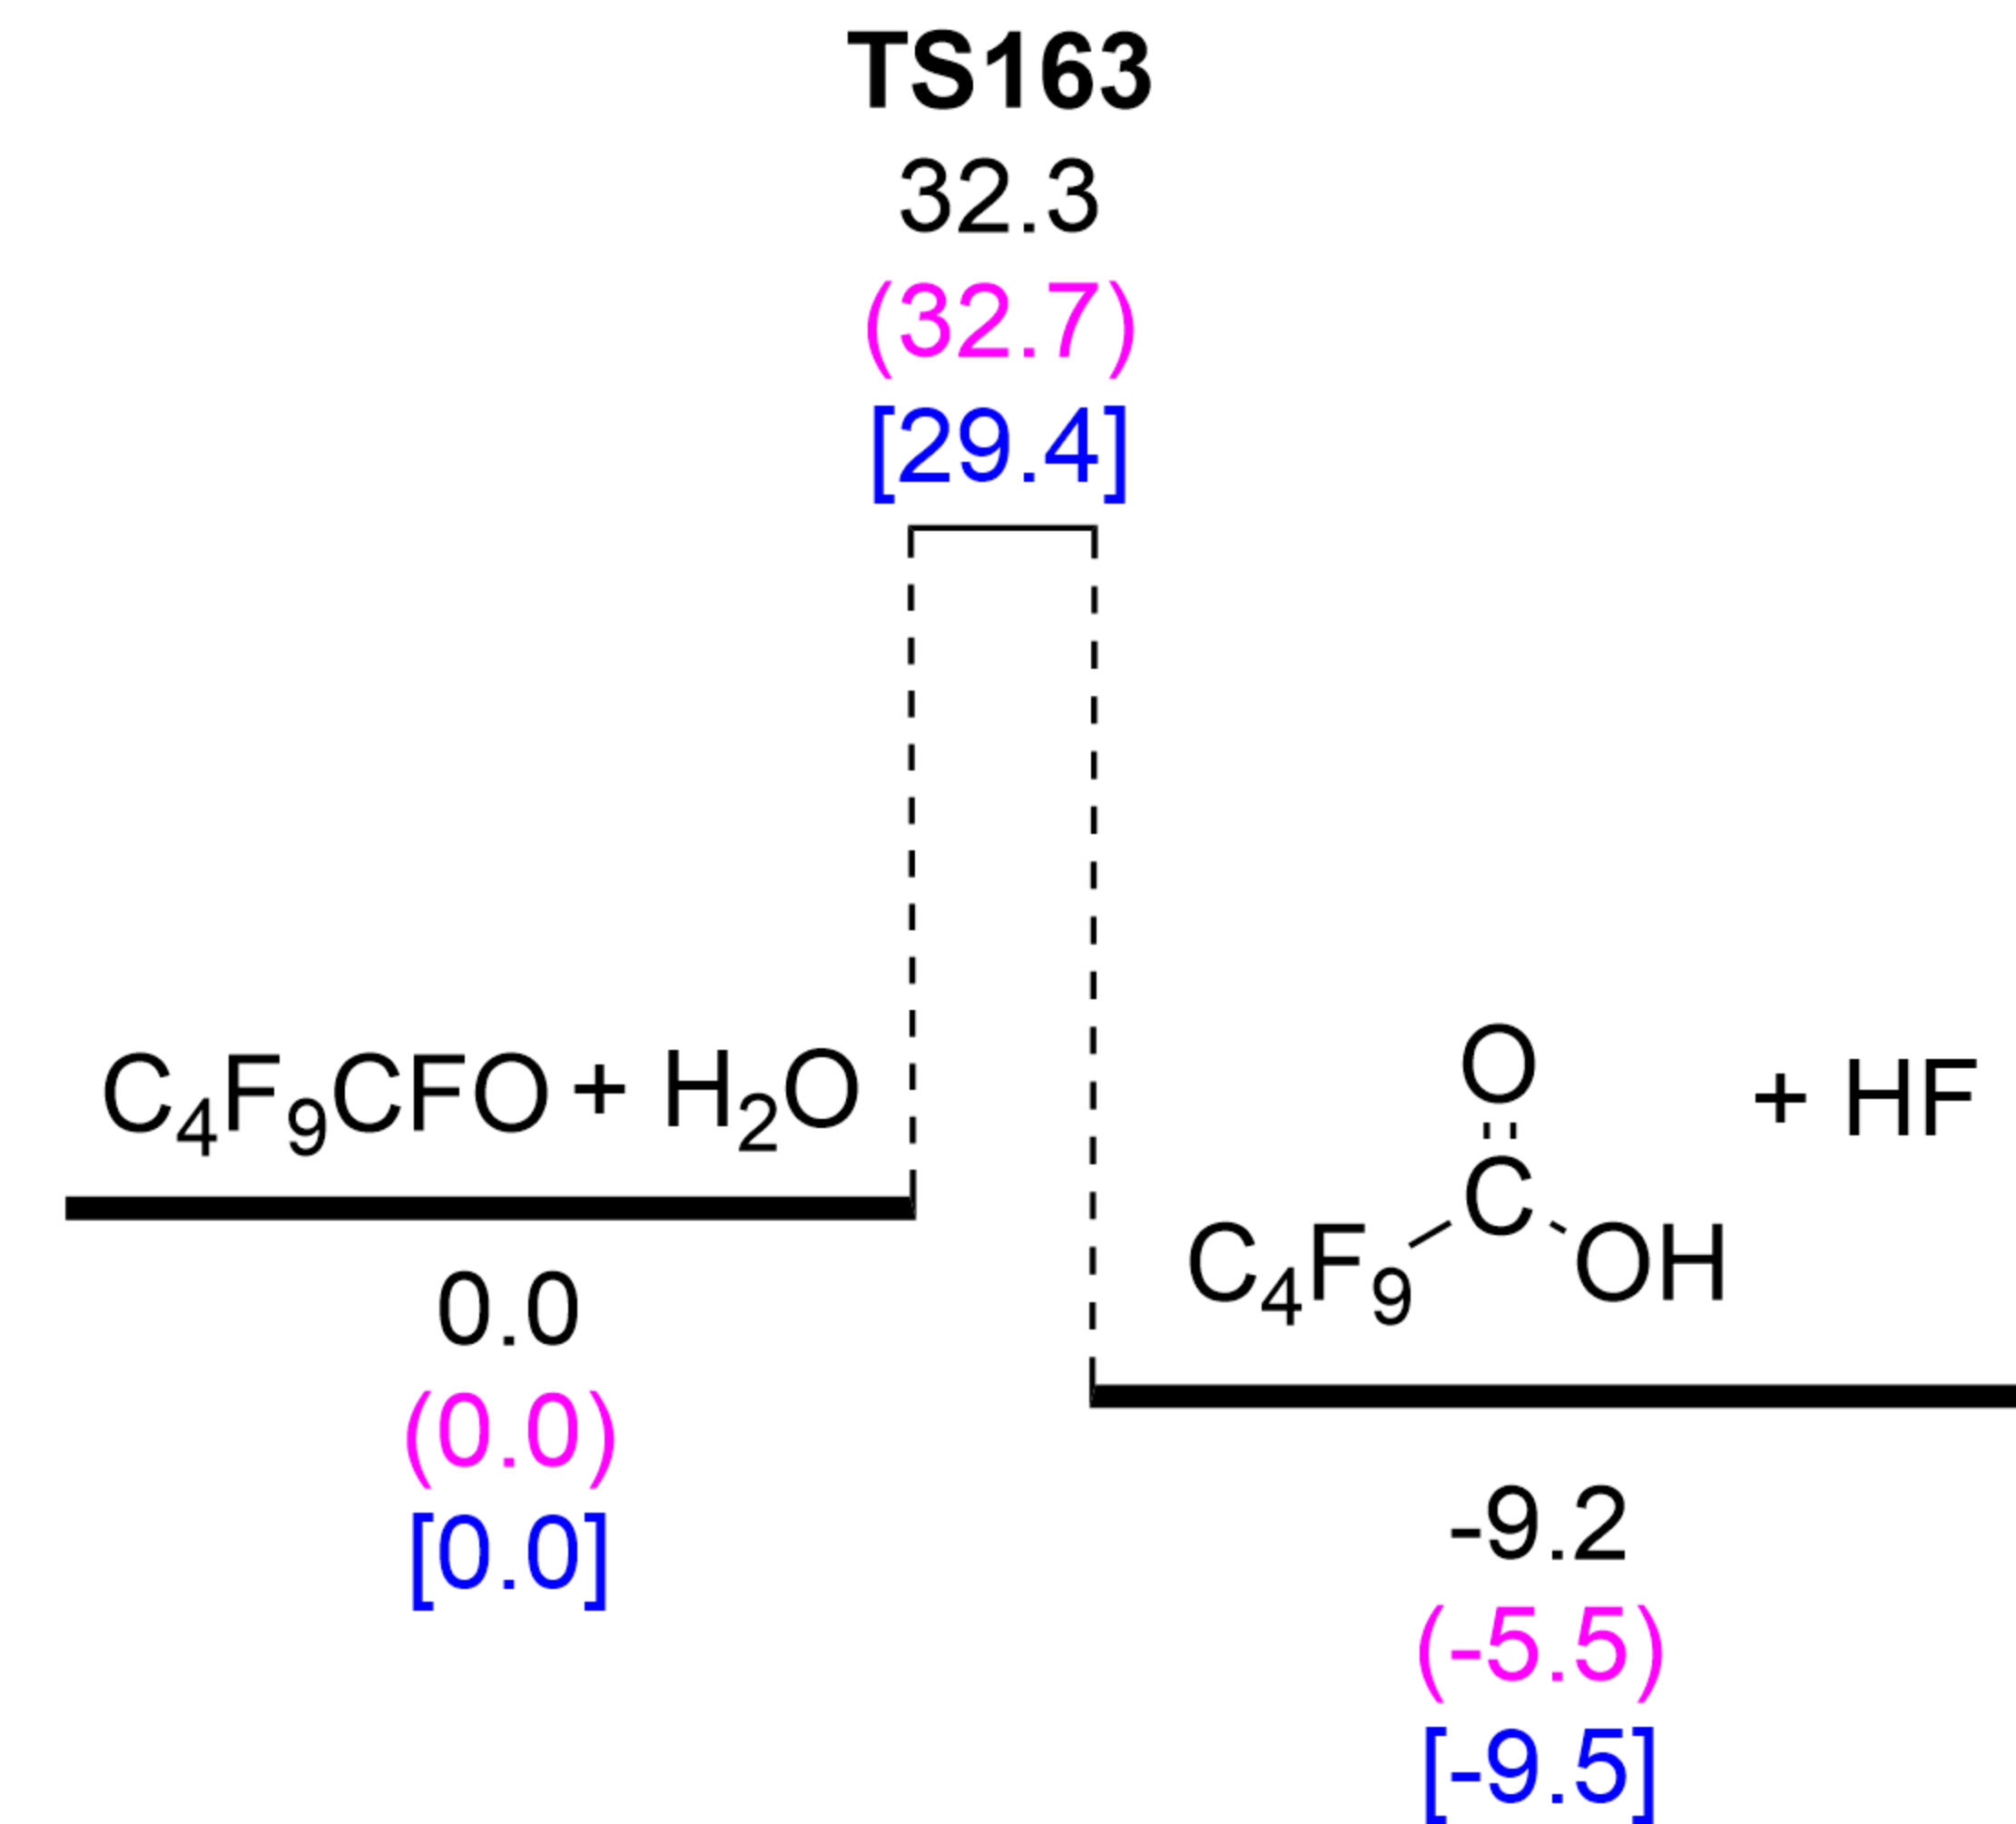

(c)

Supplement: d2em00259k2.zip [file d2em00259k2.zip]

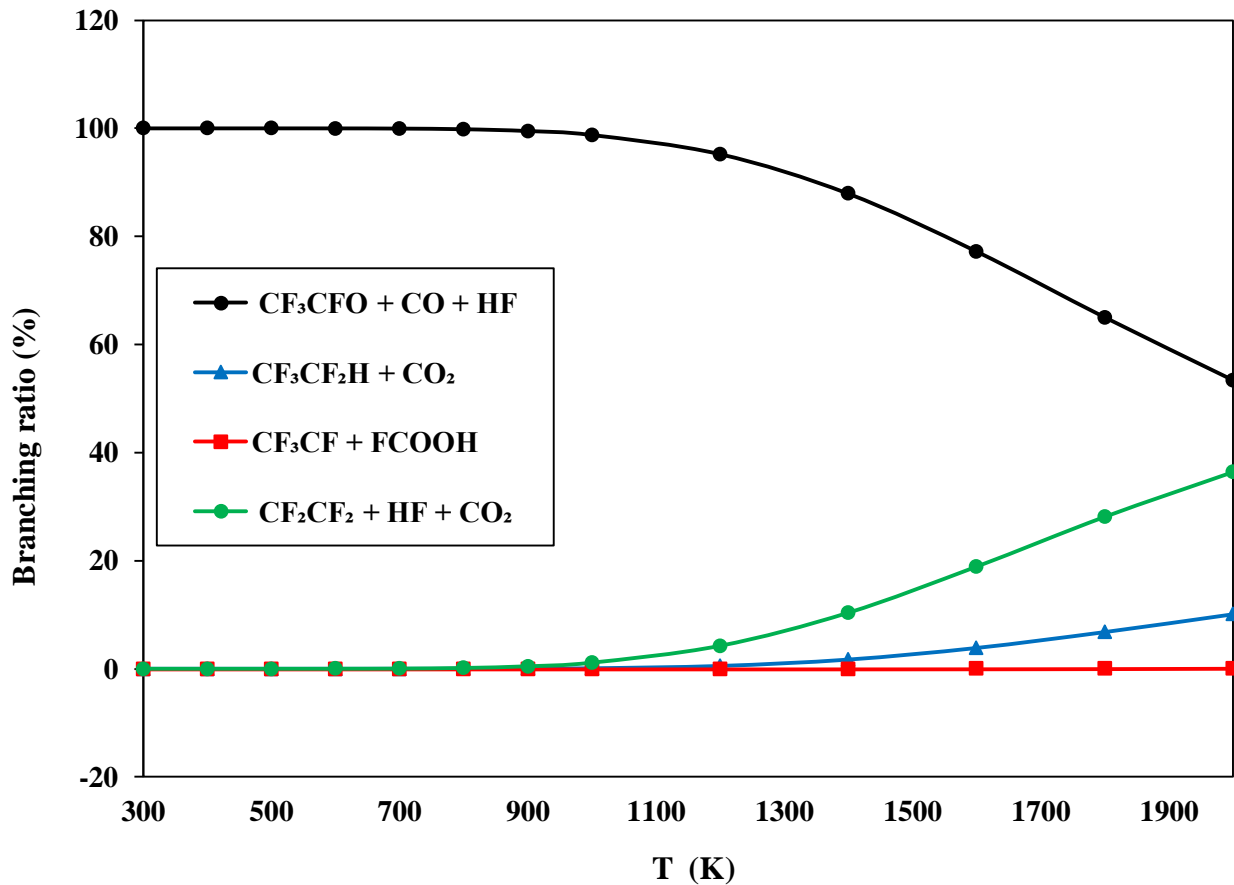

Supplement: d2em00259k2.zip [file d2em00259k2.zip]

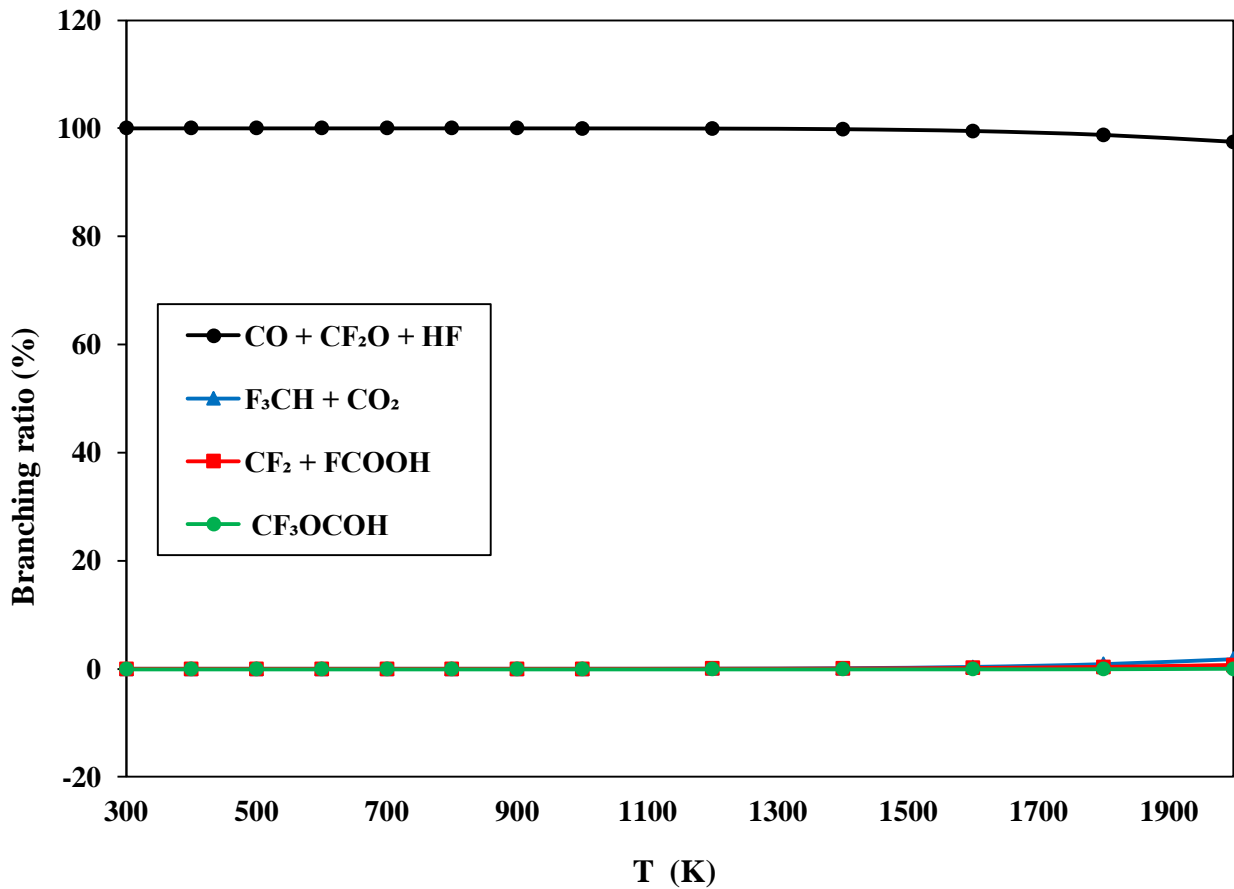

Supplement: d2em00259k2.zip [file d2em00259k2.zip]

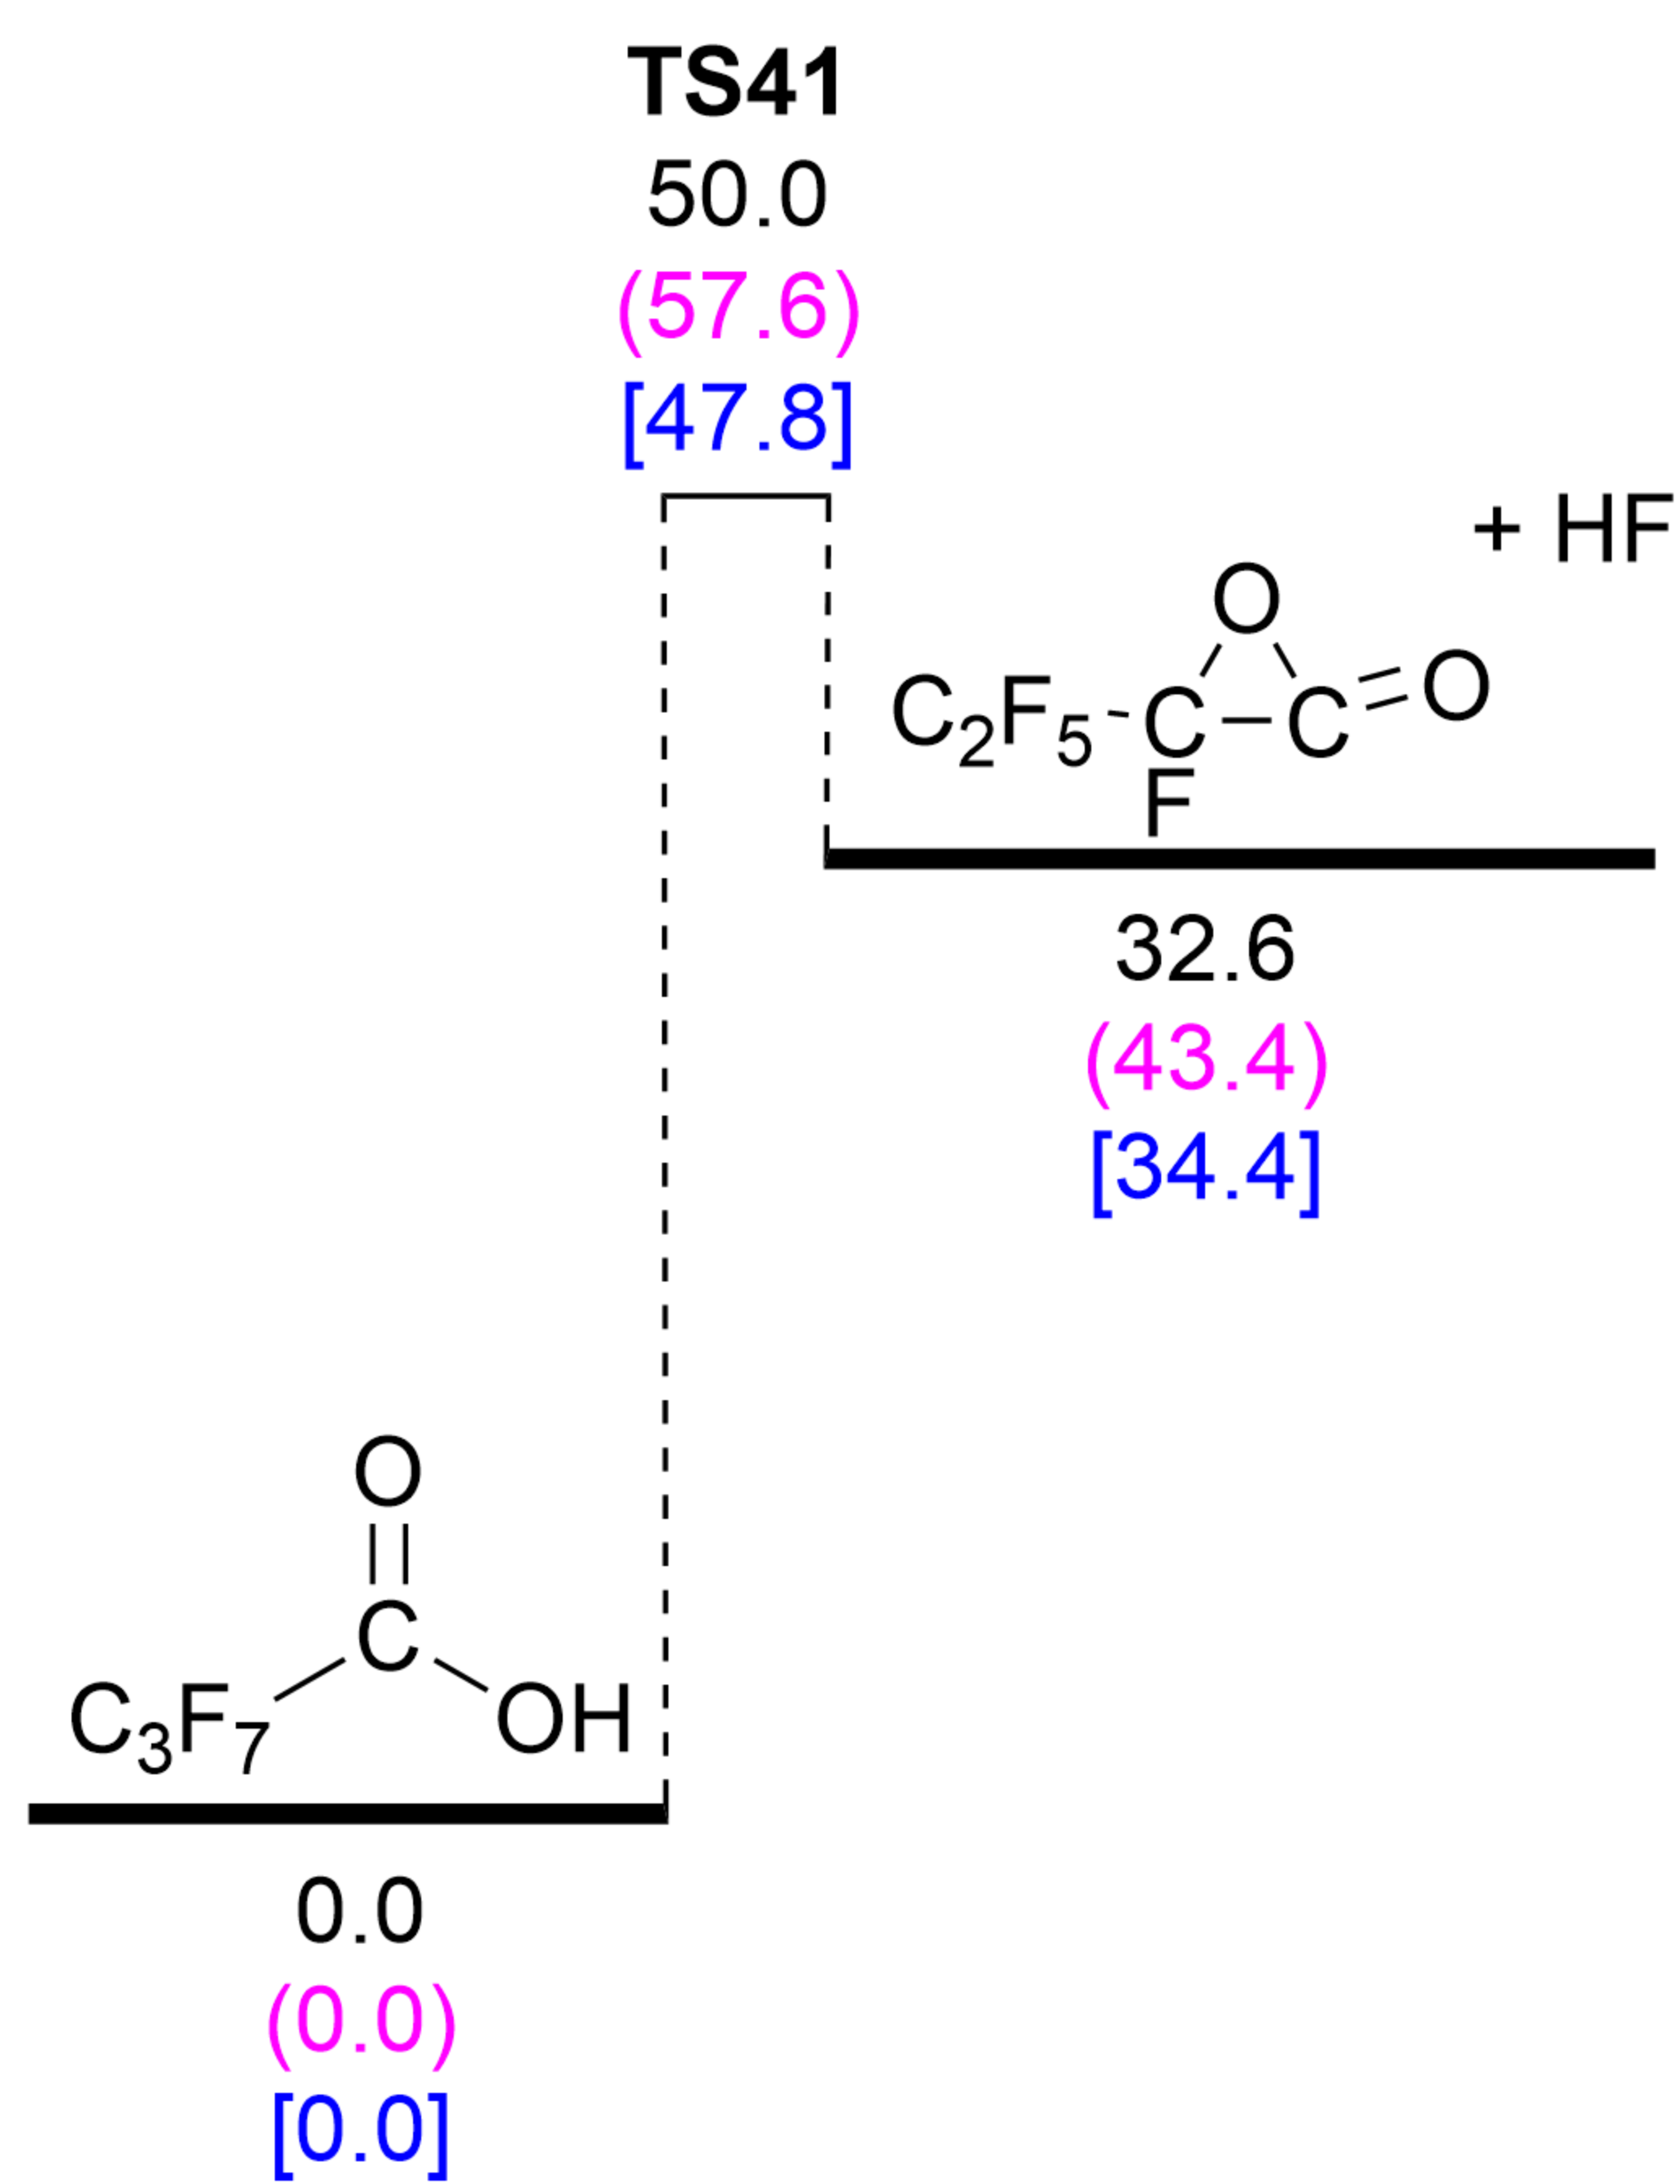

(a)

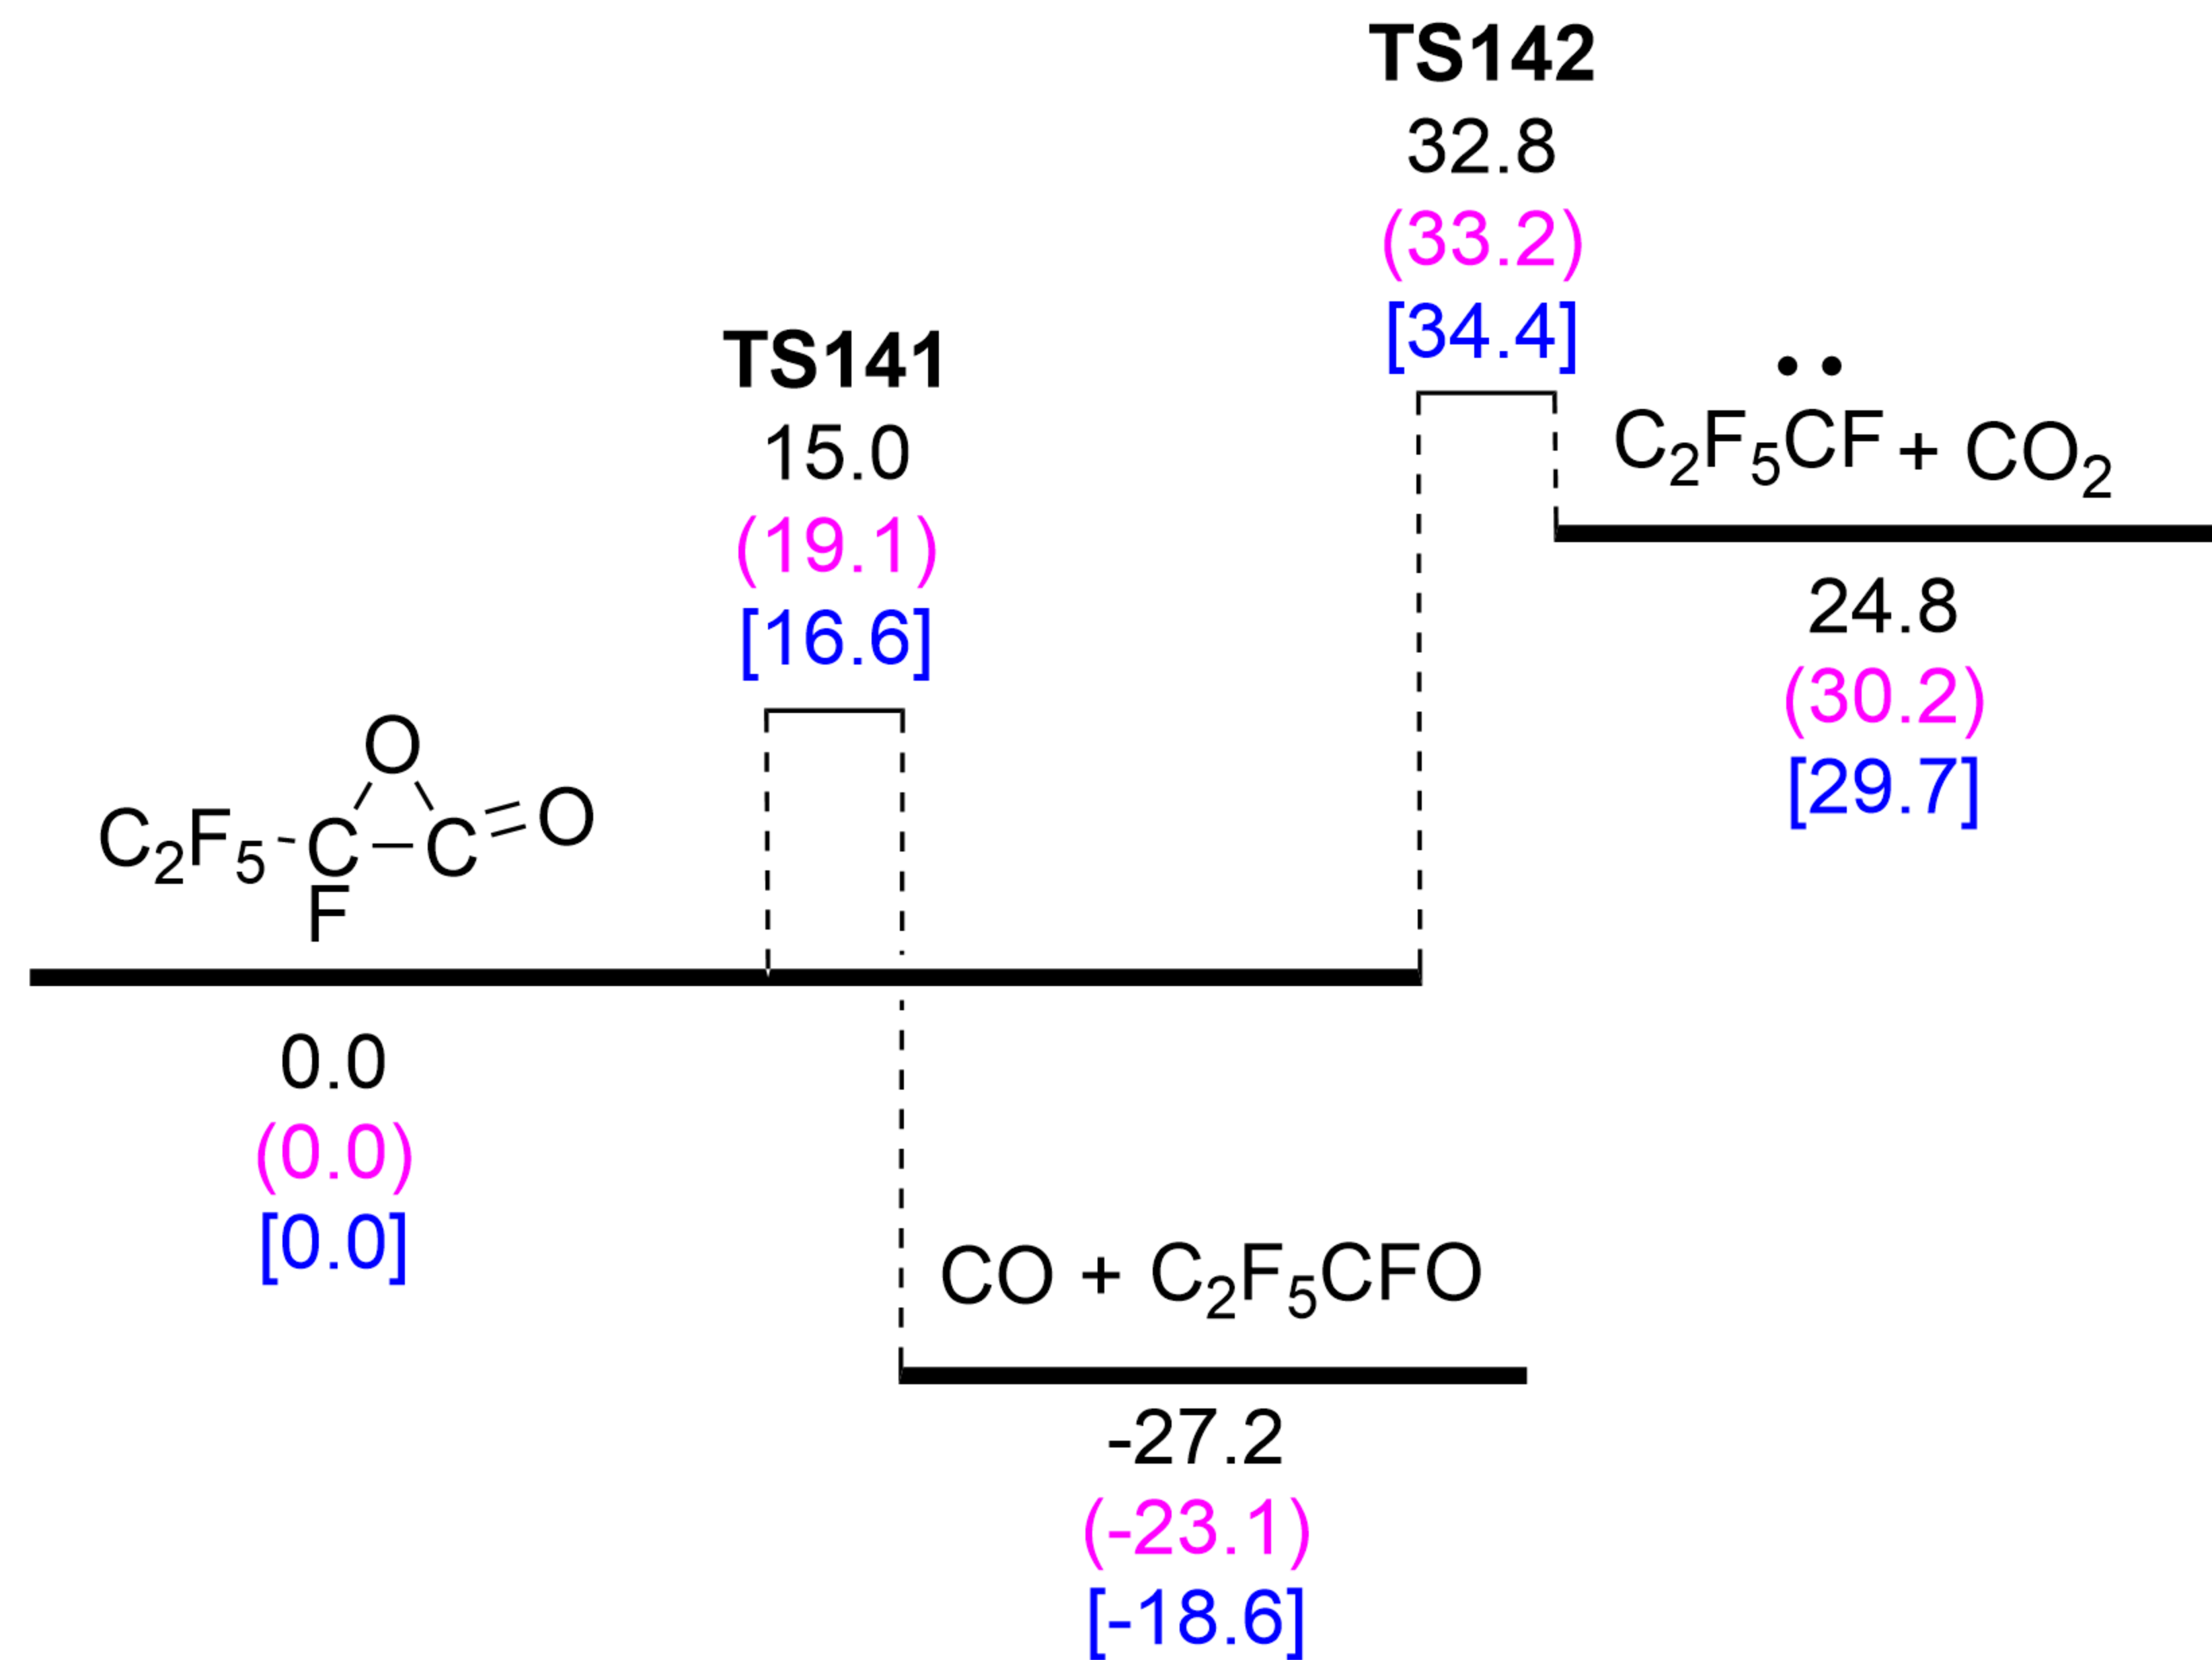

(b)

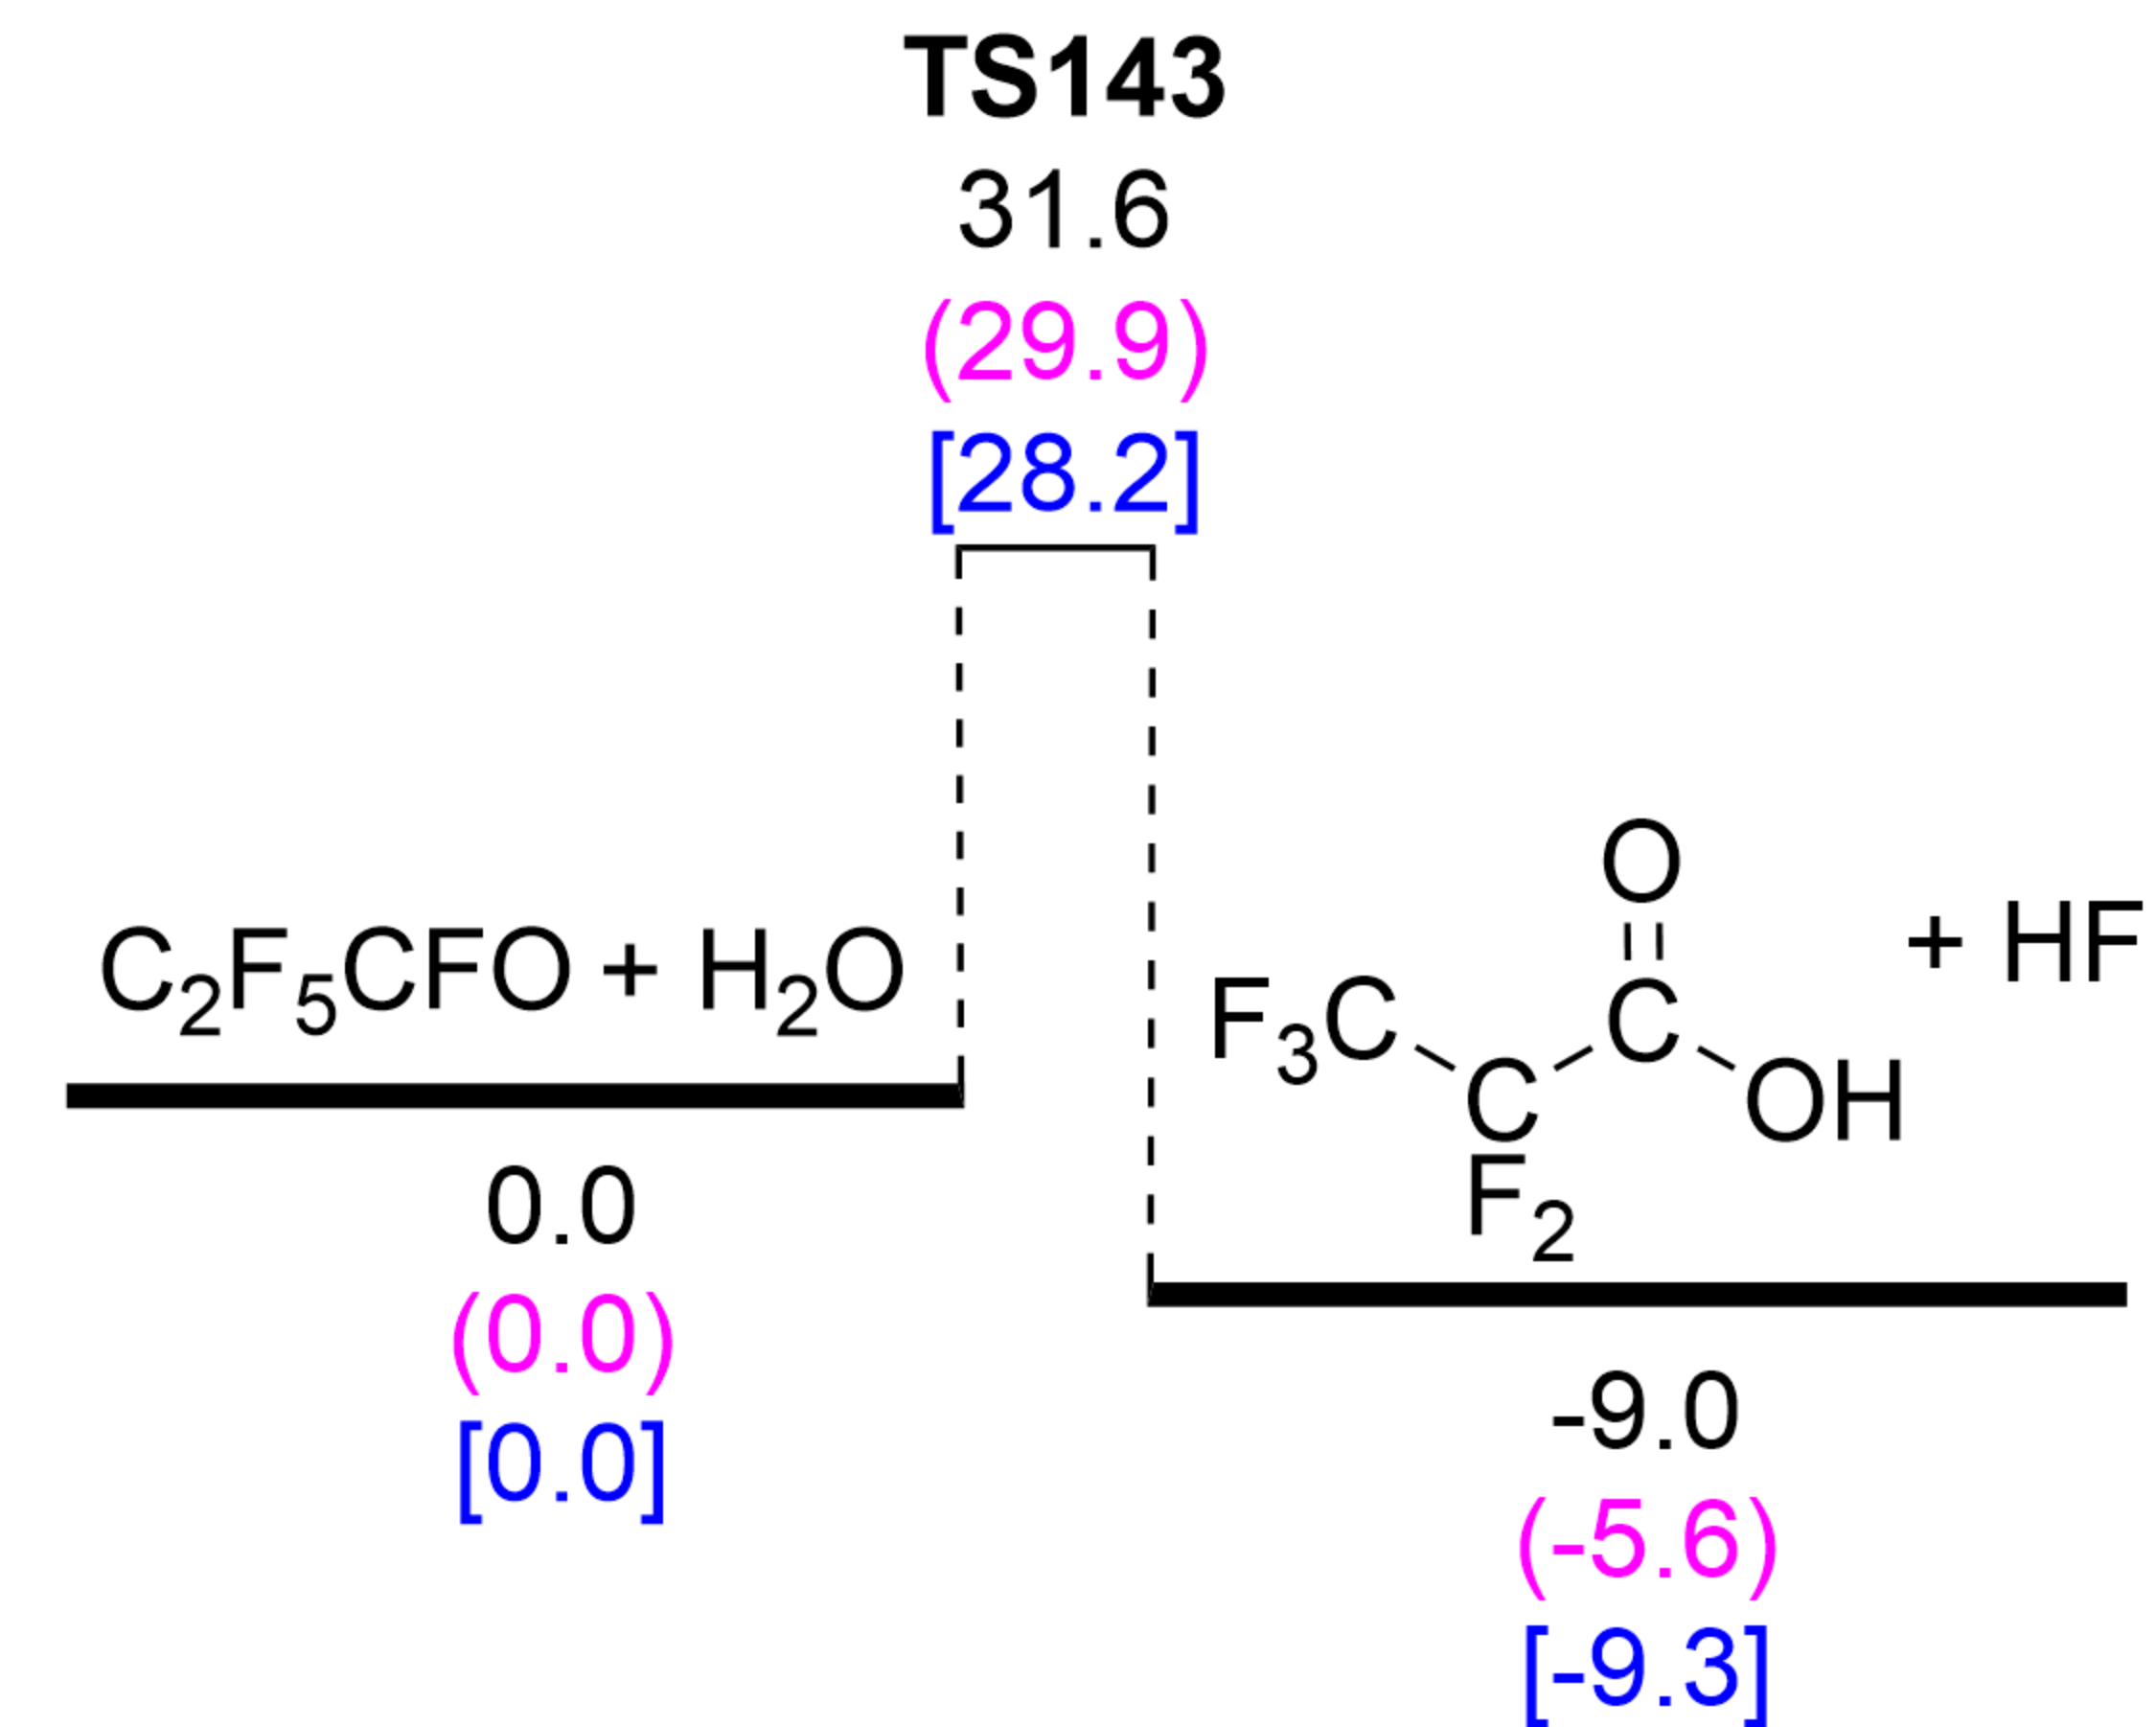

(c)

Supplement: d2em00259k2.zip [file d2em00259k2.zip]

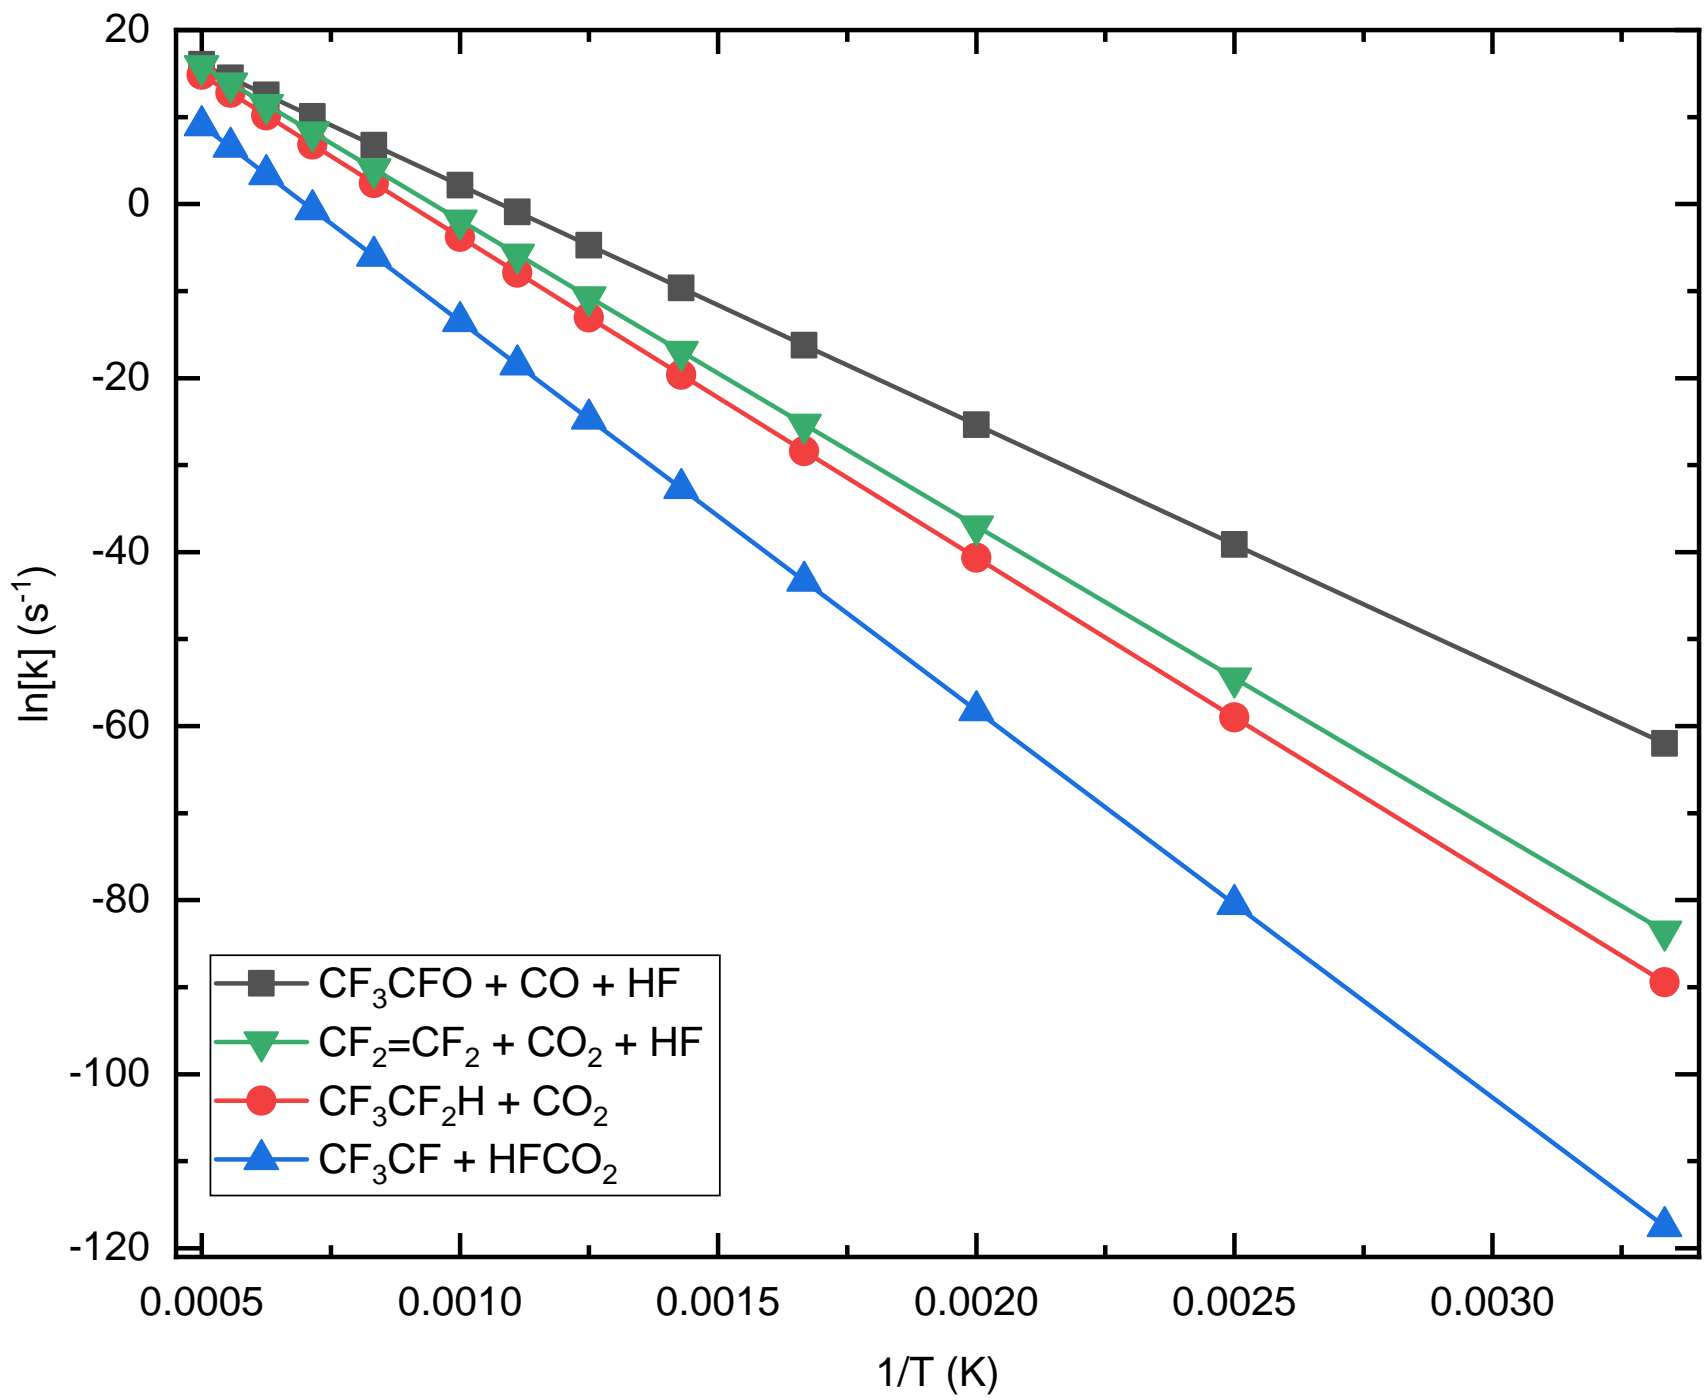

Supplement: d2em00259k2.zip [file d2em00259k2.zip]

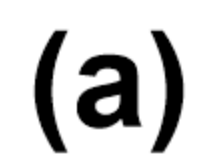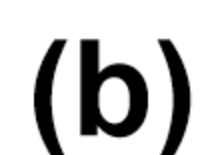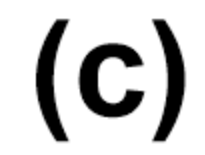

Supplement: d2em00259k2.zip [file d2em00259k2.zip]

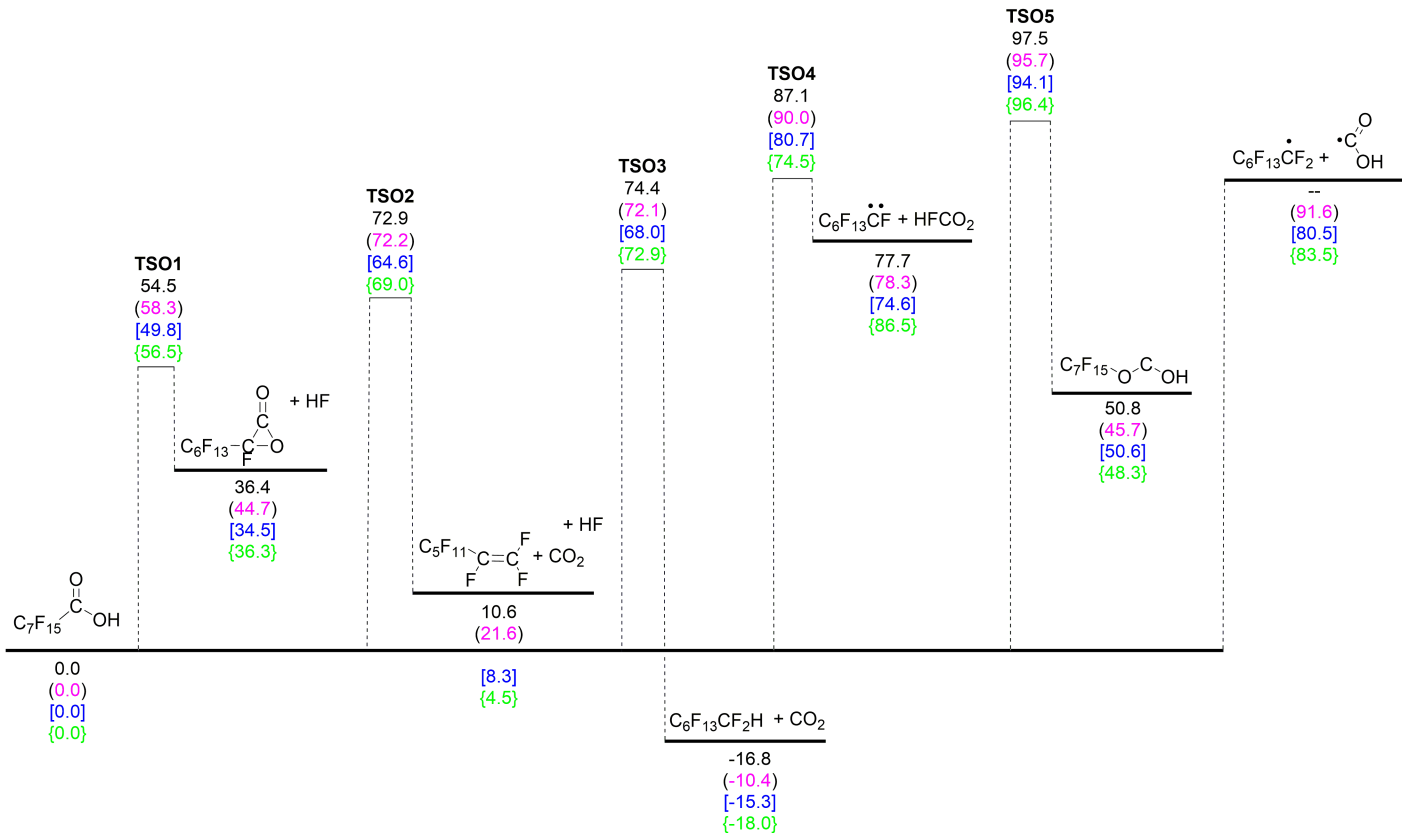

Supplement: d2em00259k2.zip [file d2em00259k2.zip]

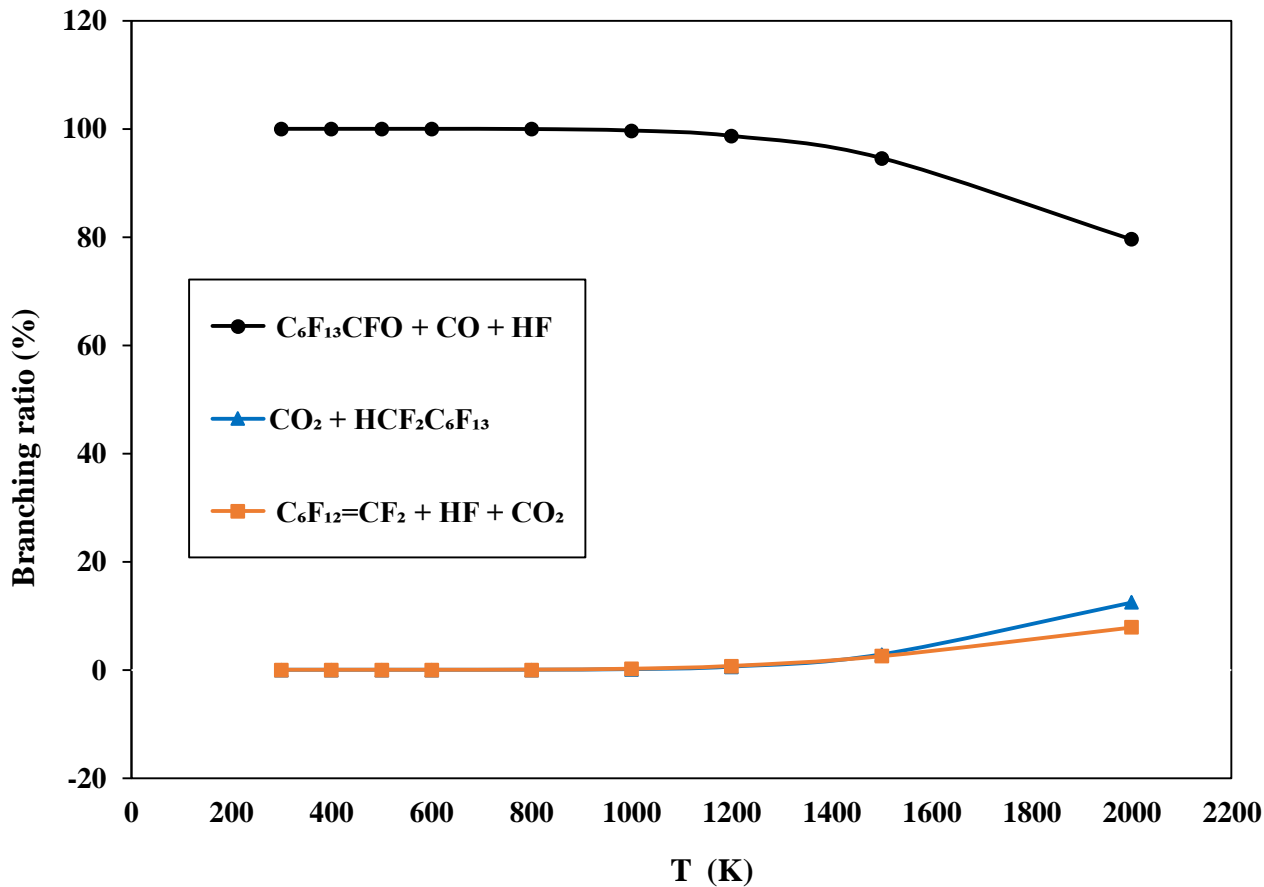

Supplement: d2em00259k2.zip [file d2em00259k2.zip]

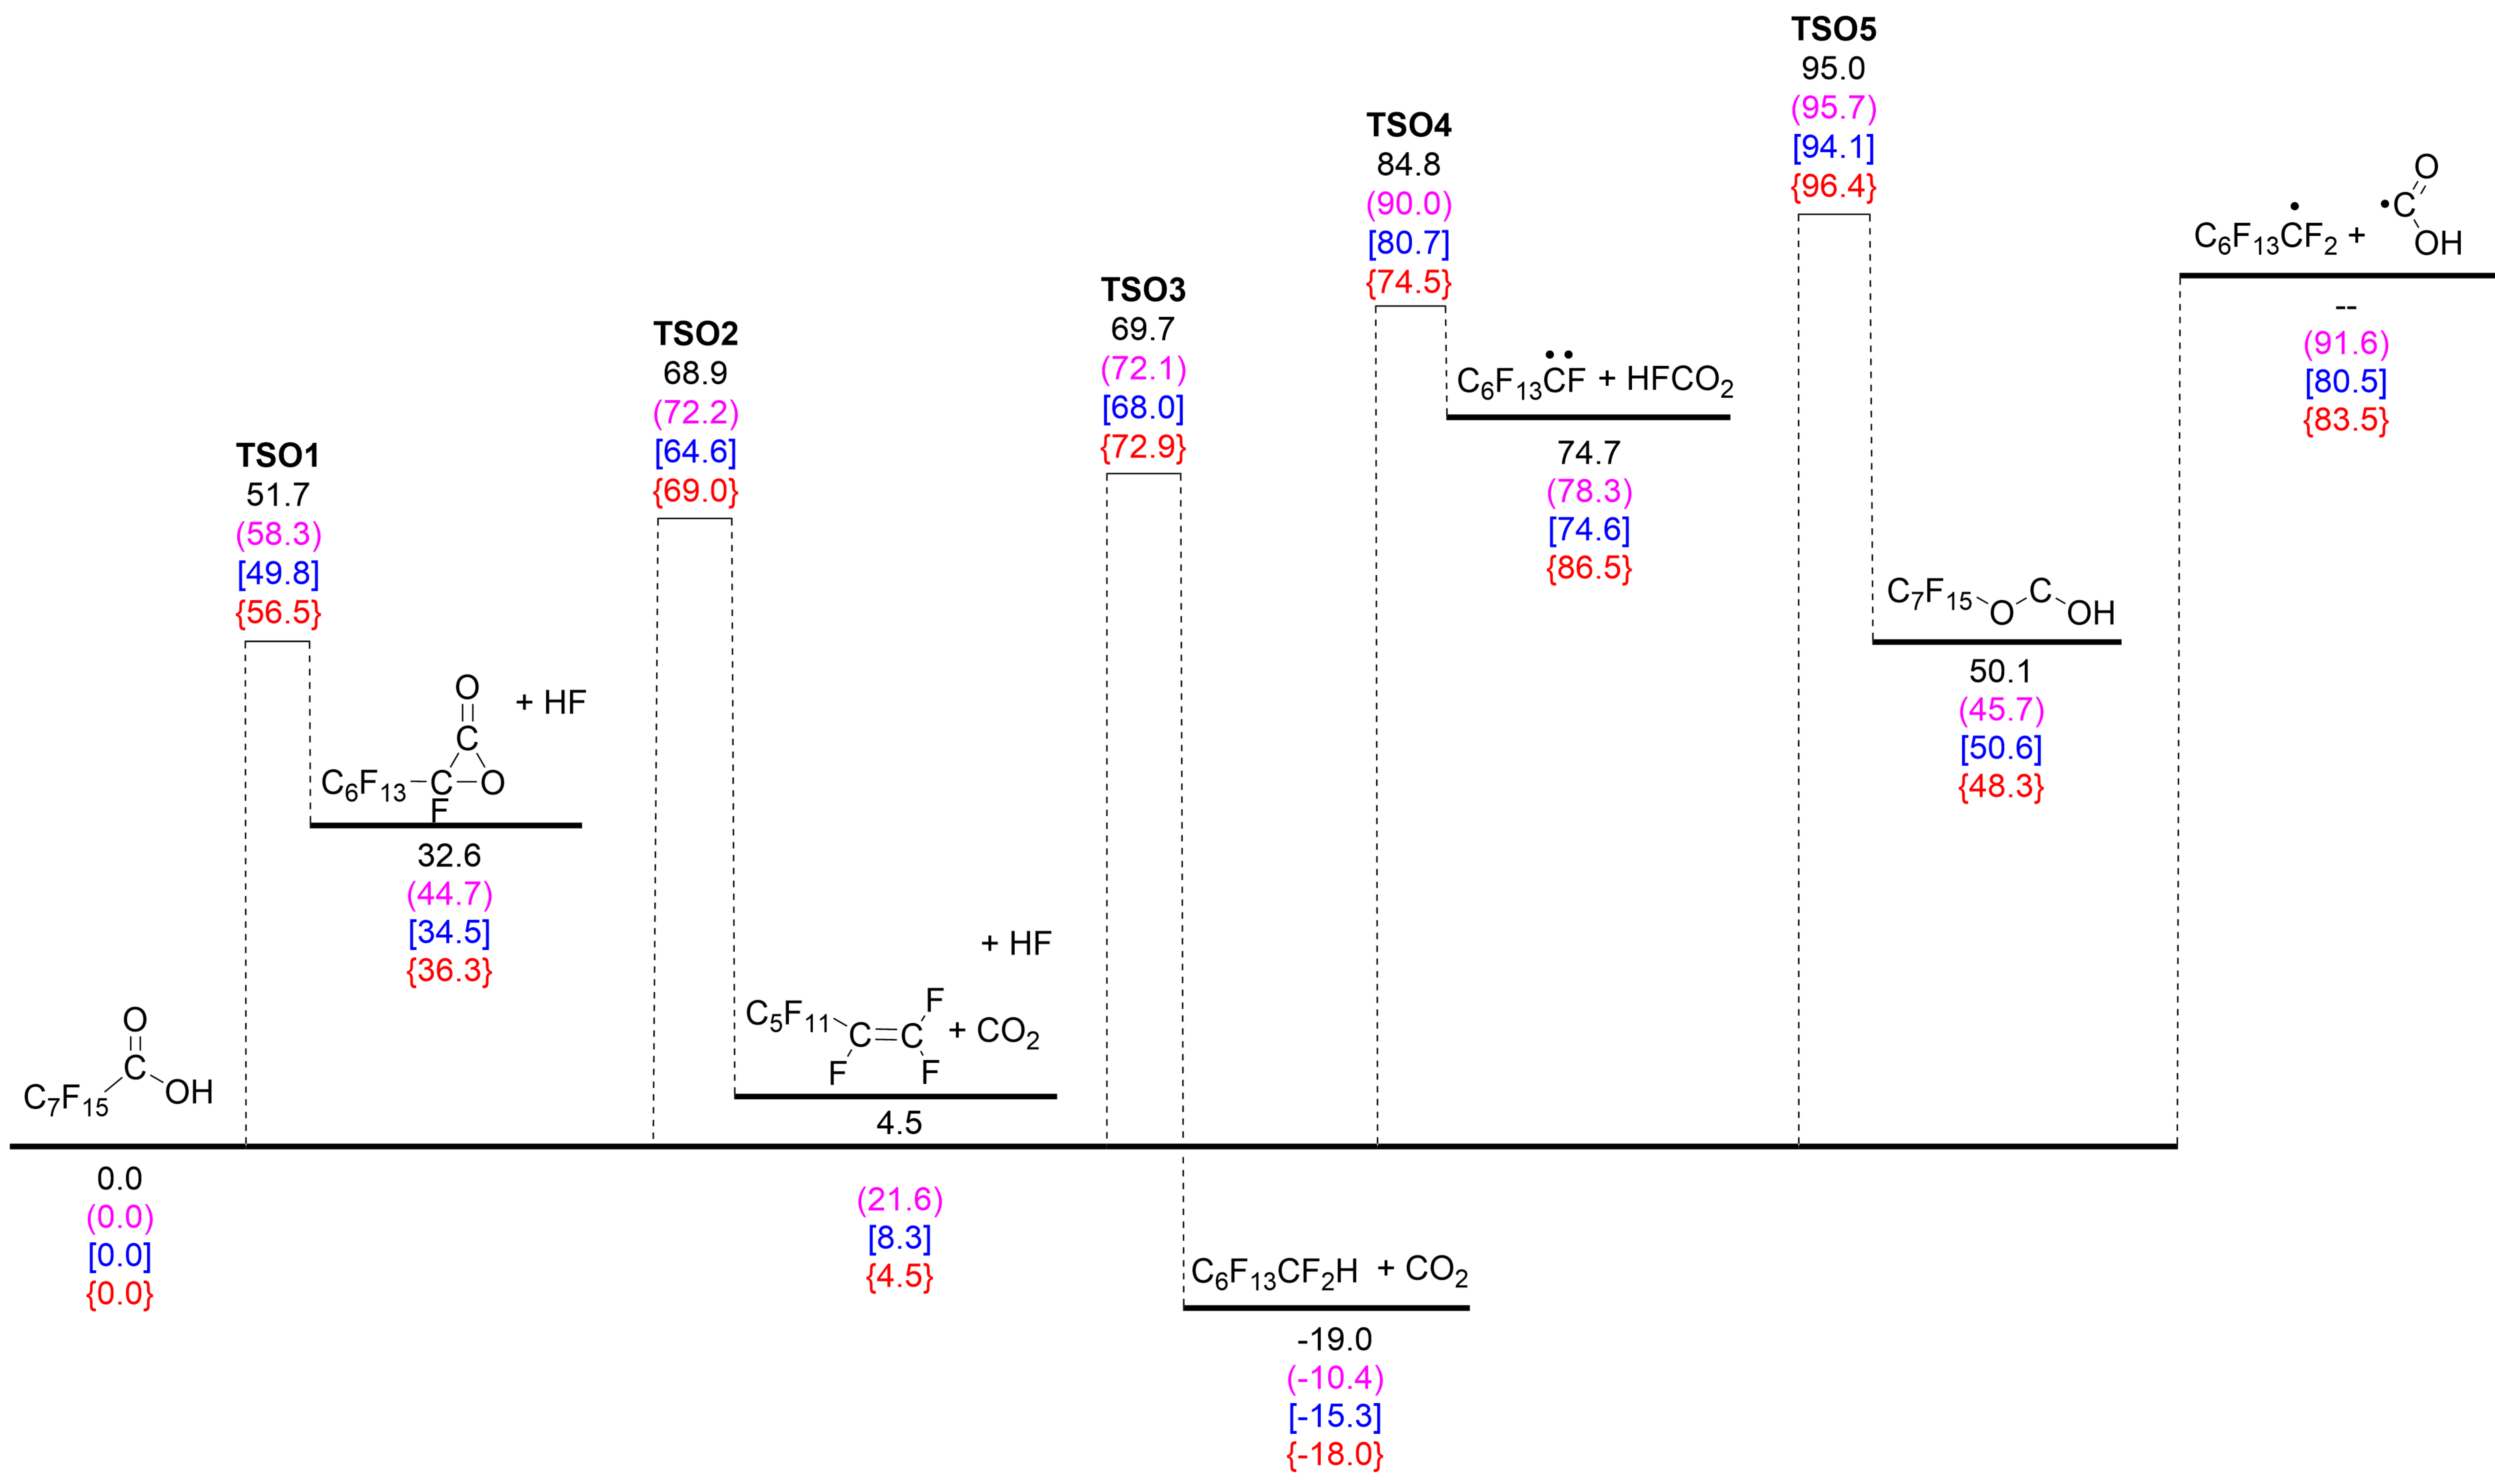

Supplement: d2em00259k2.zip [file d2em00259k2.zip]

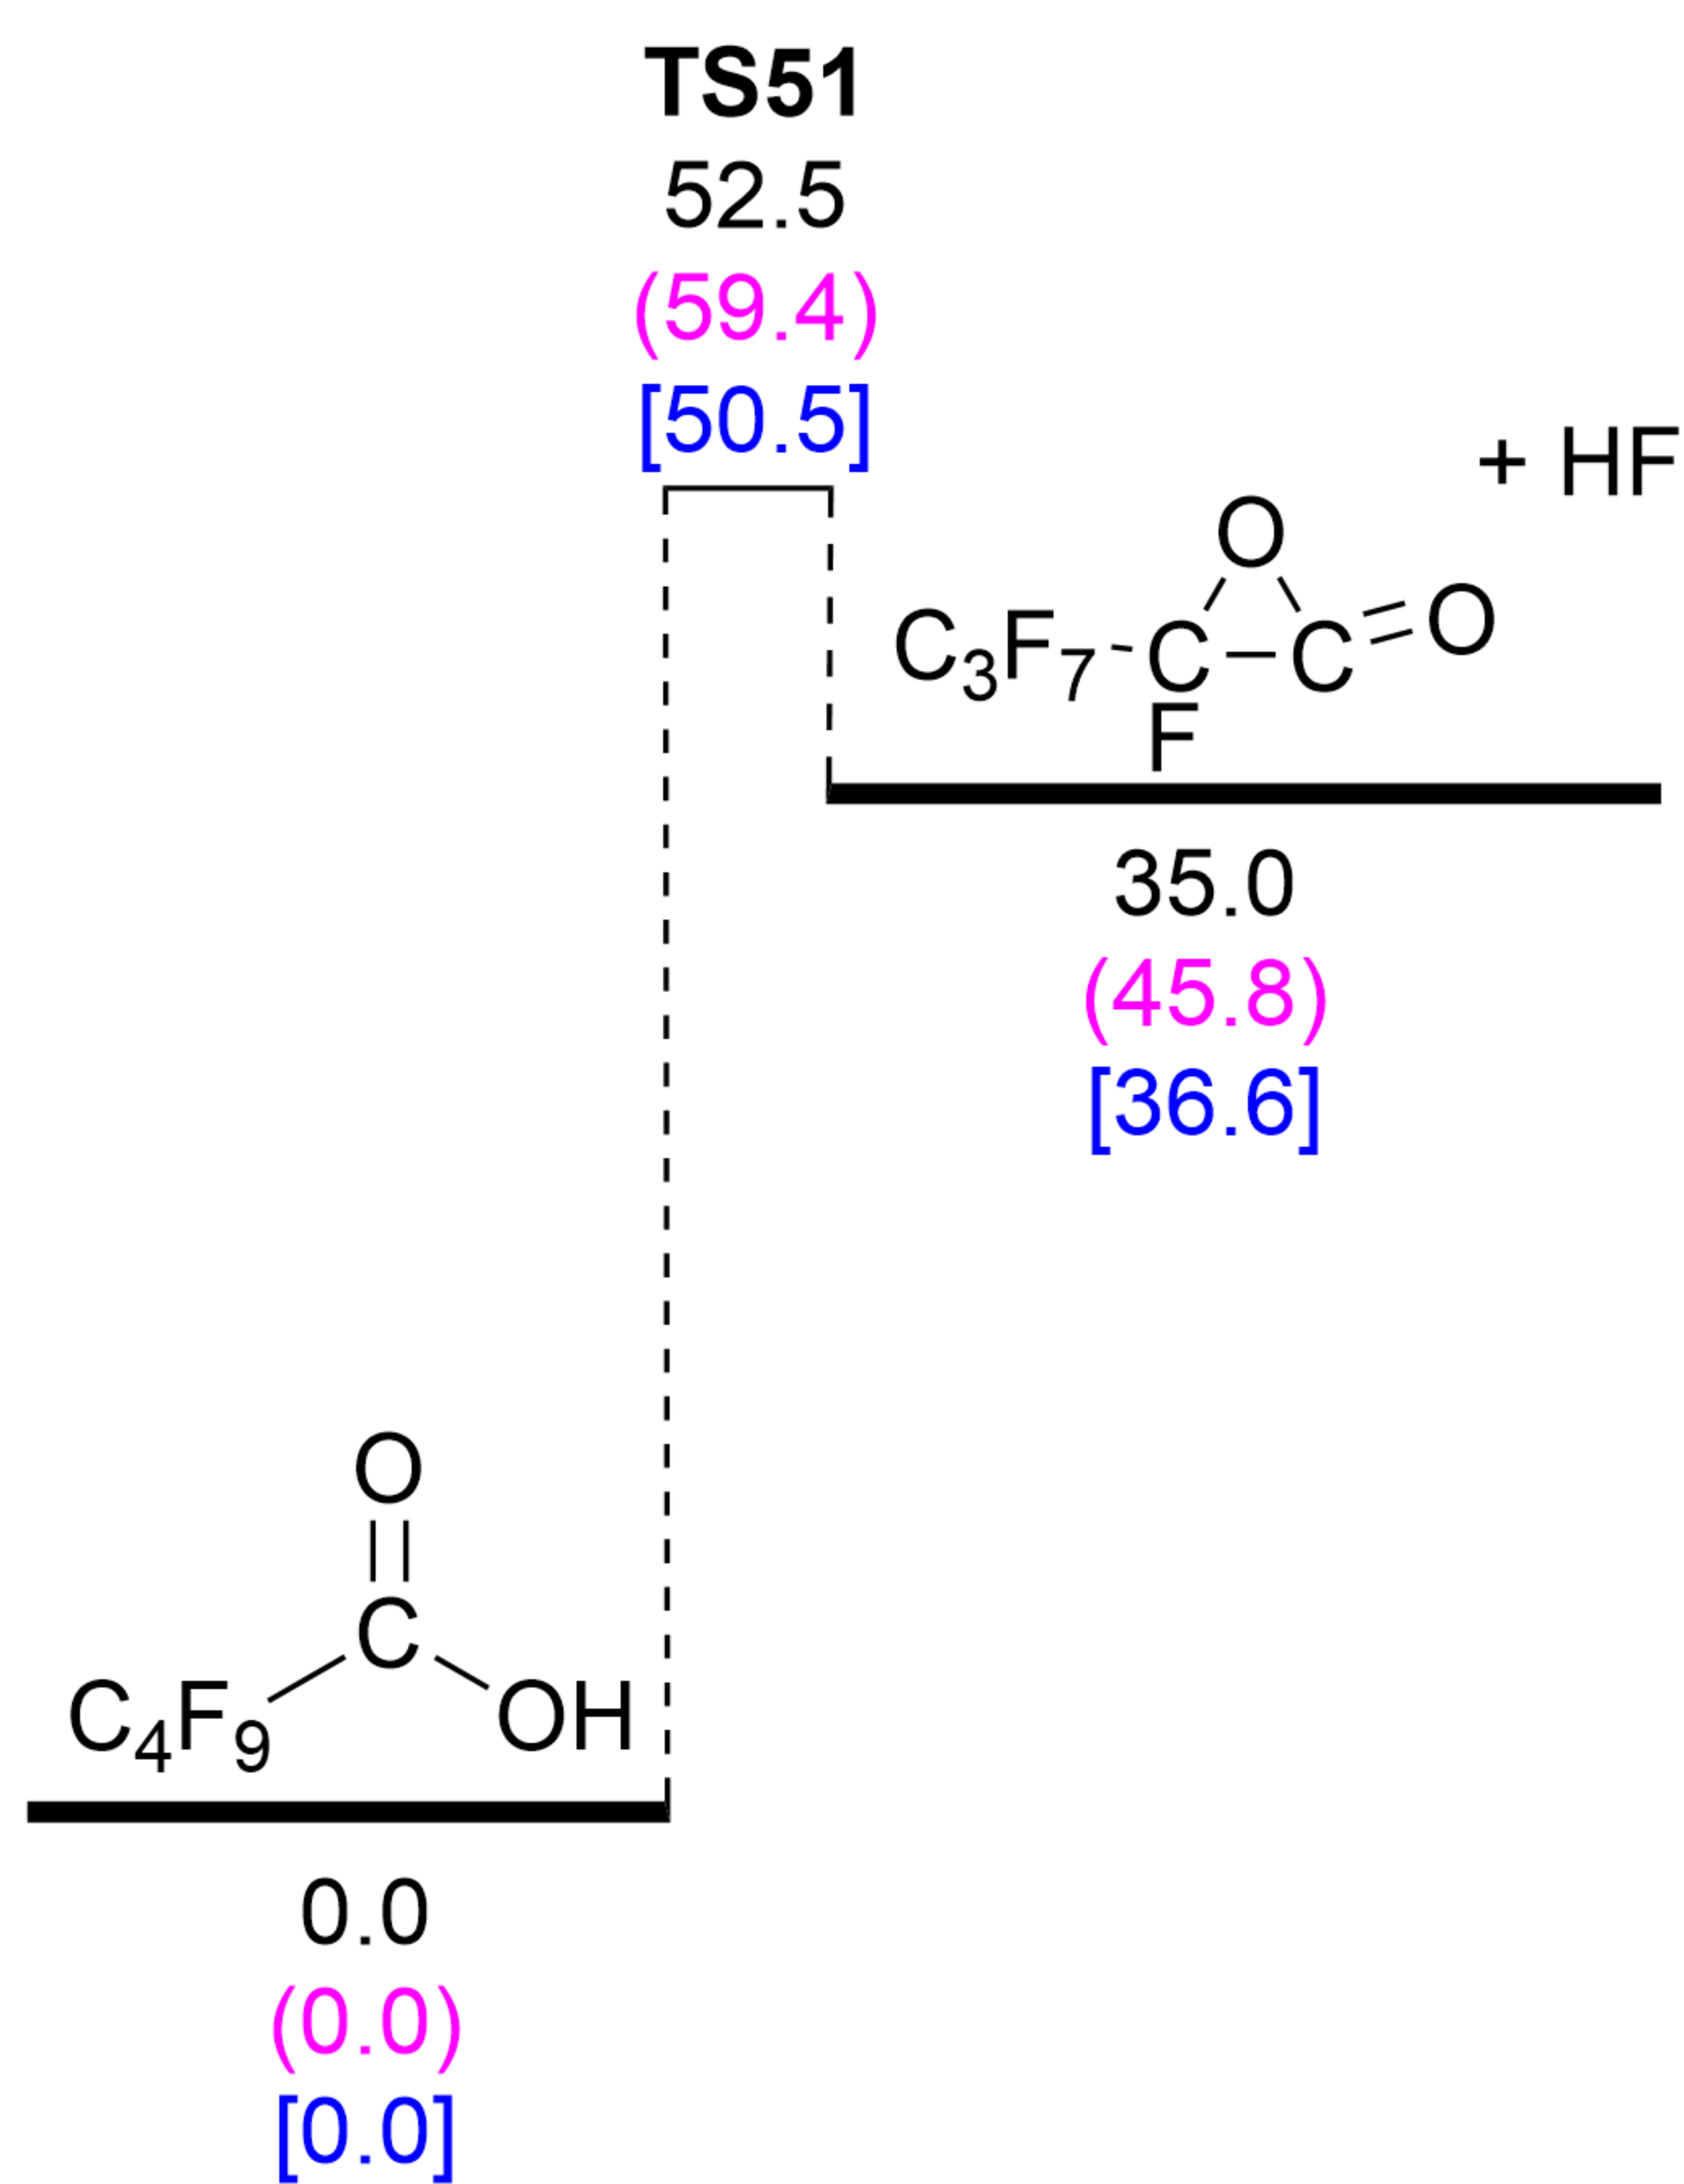

(a)

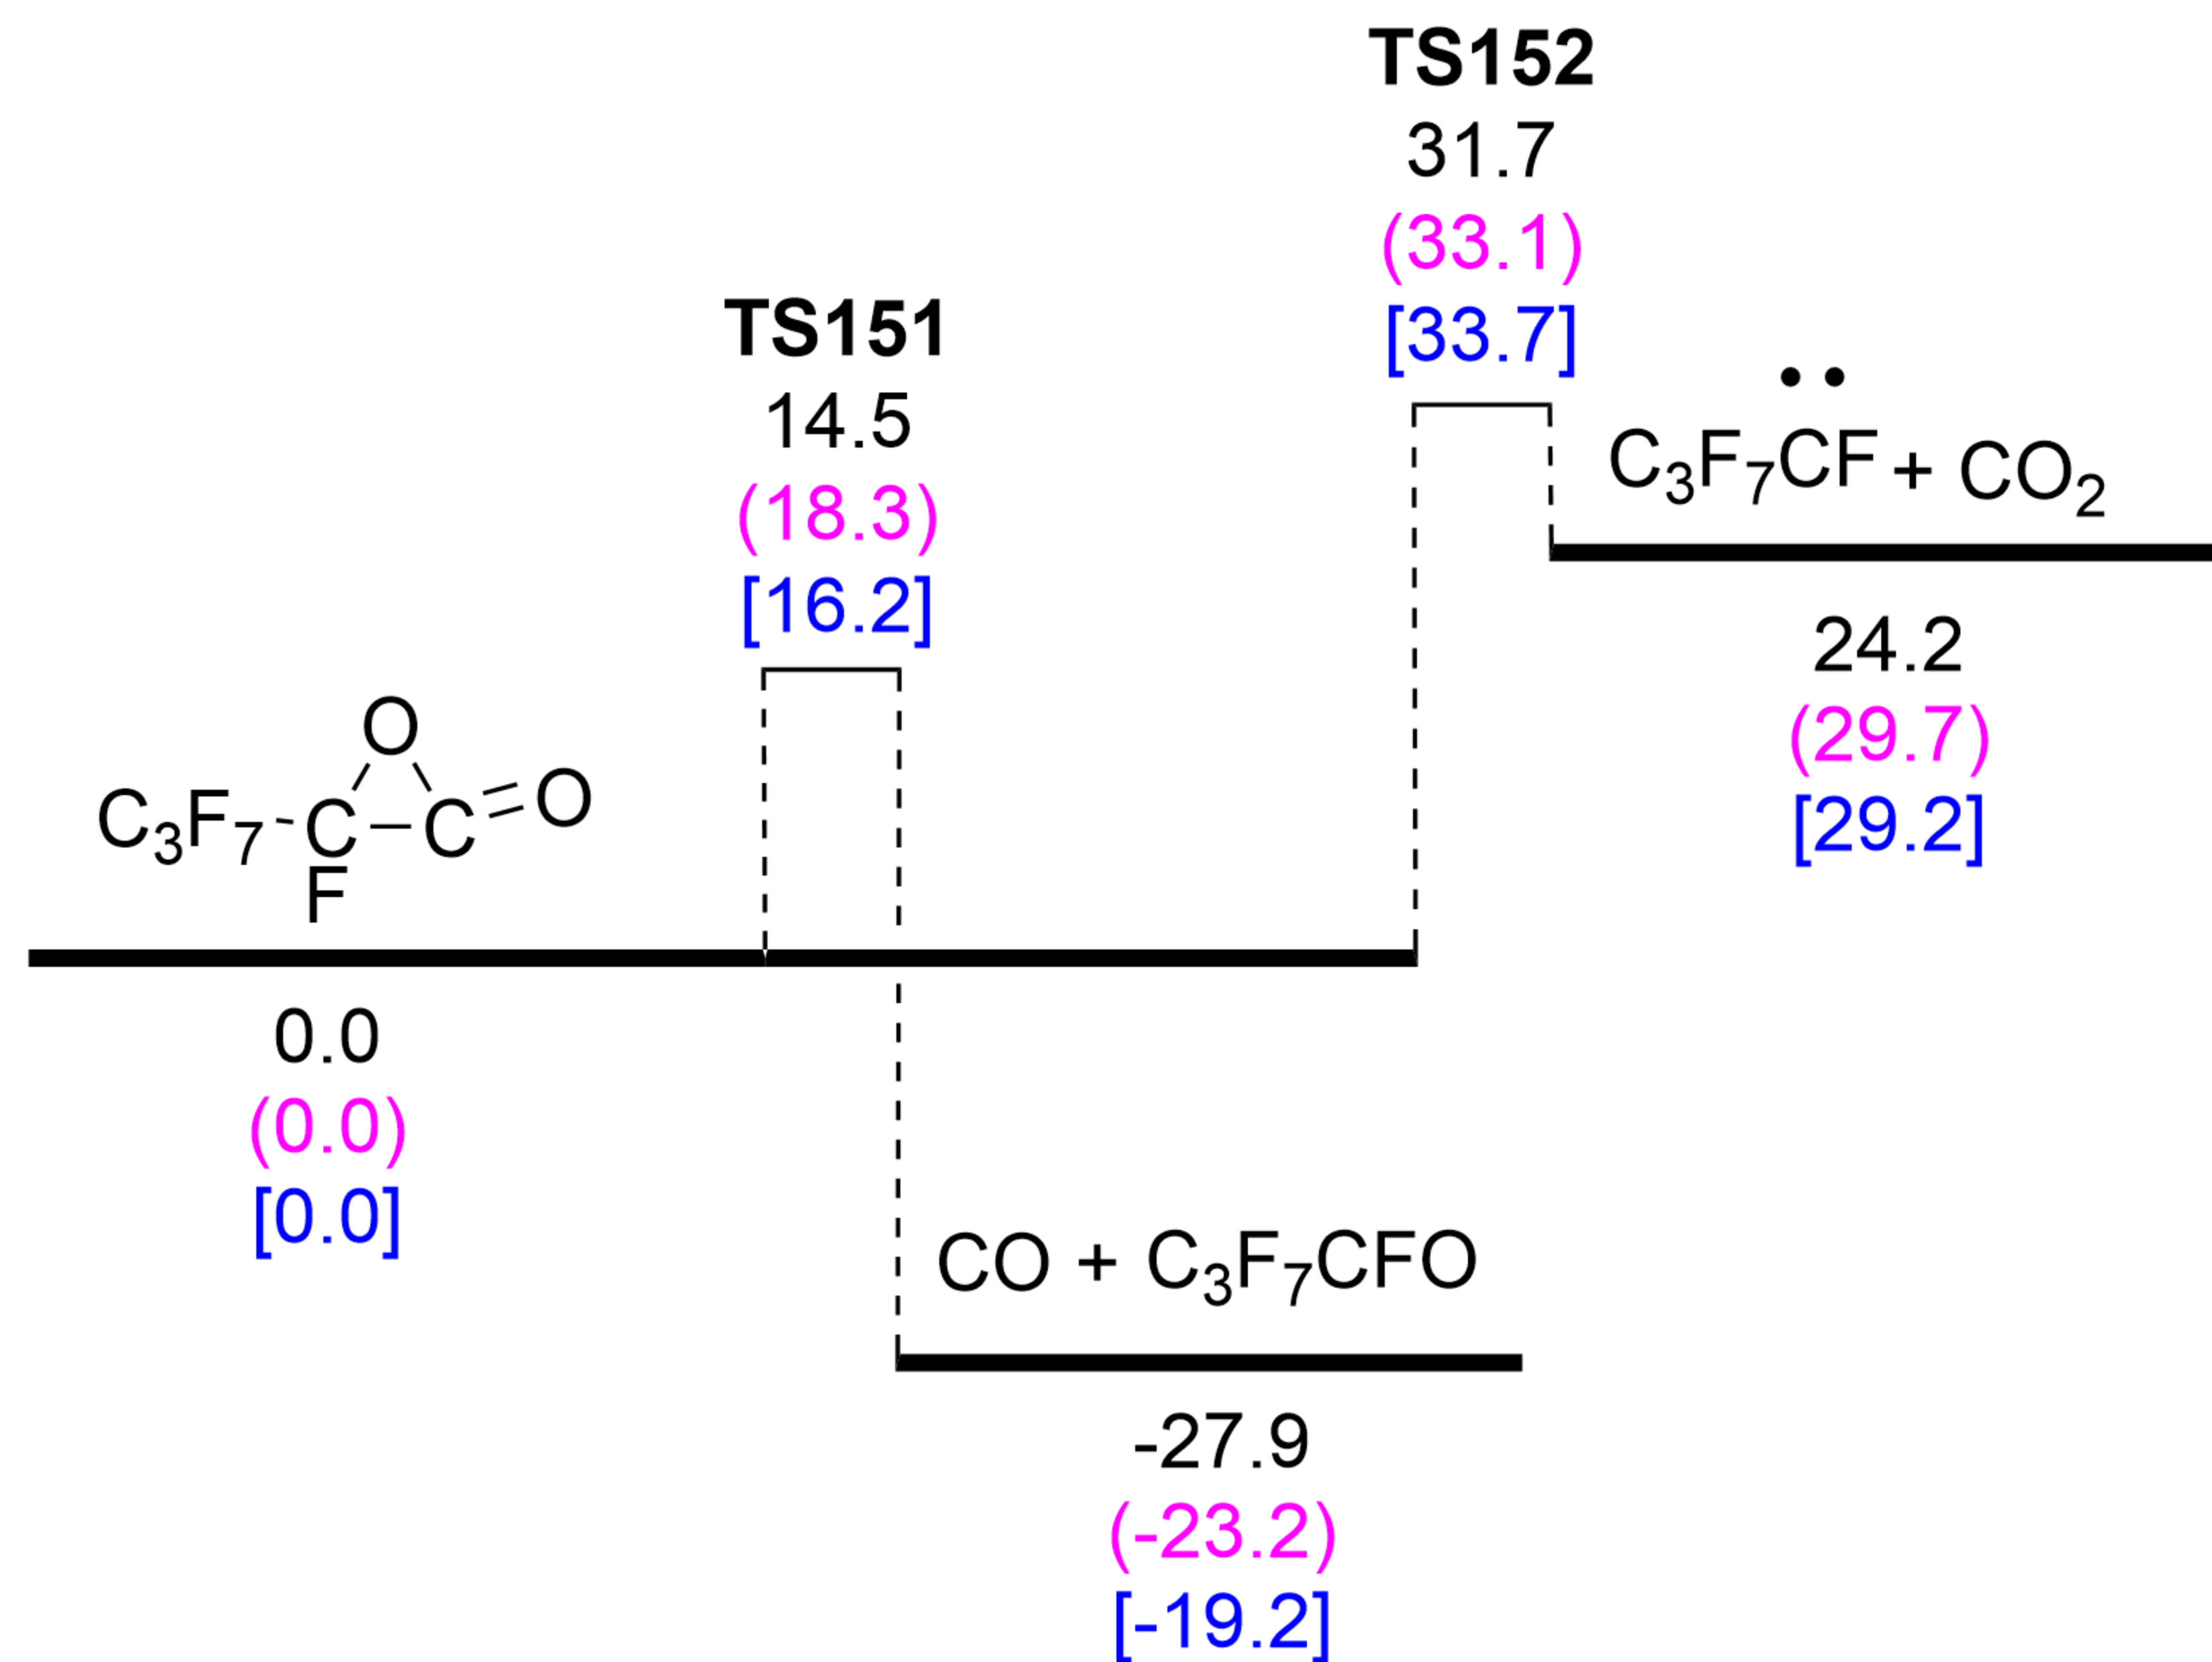

(b)

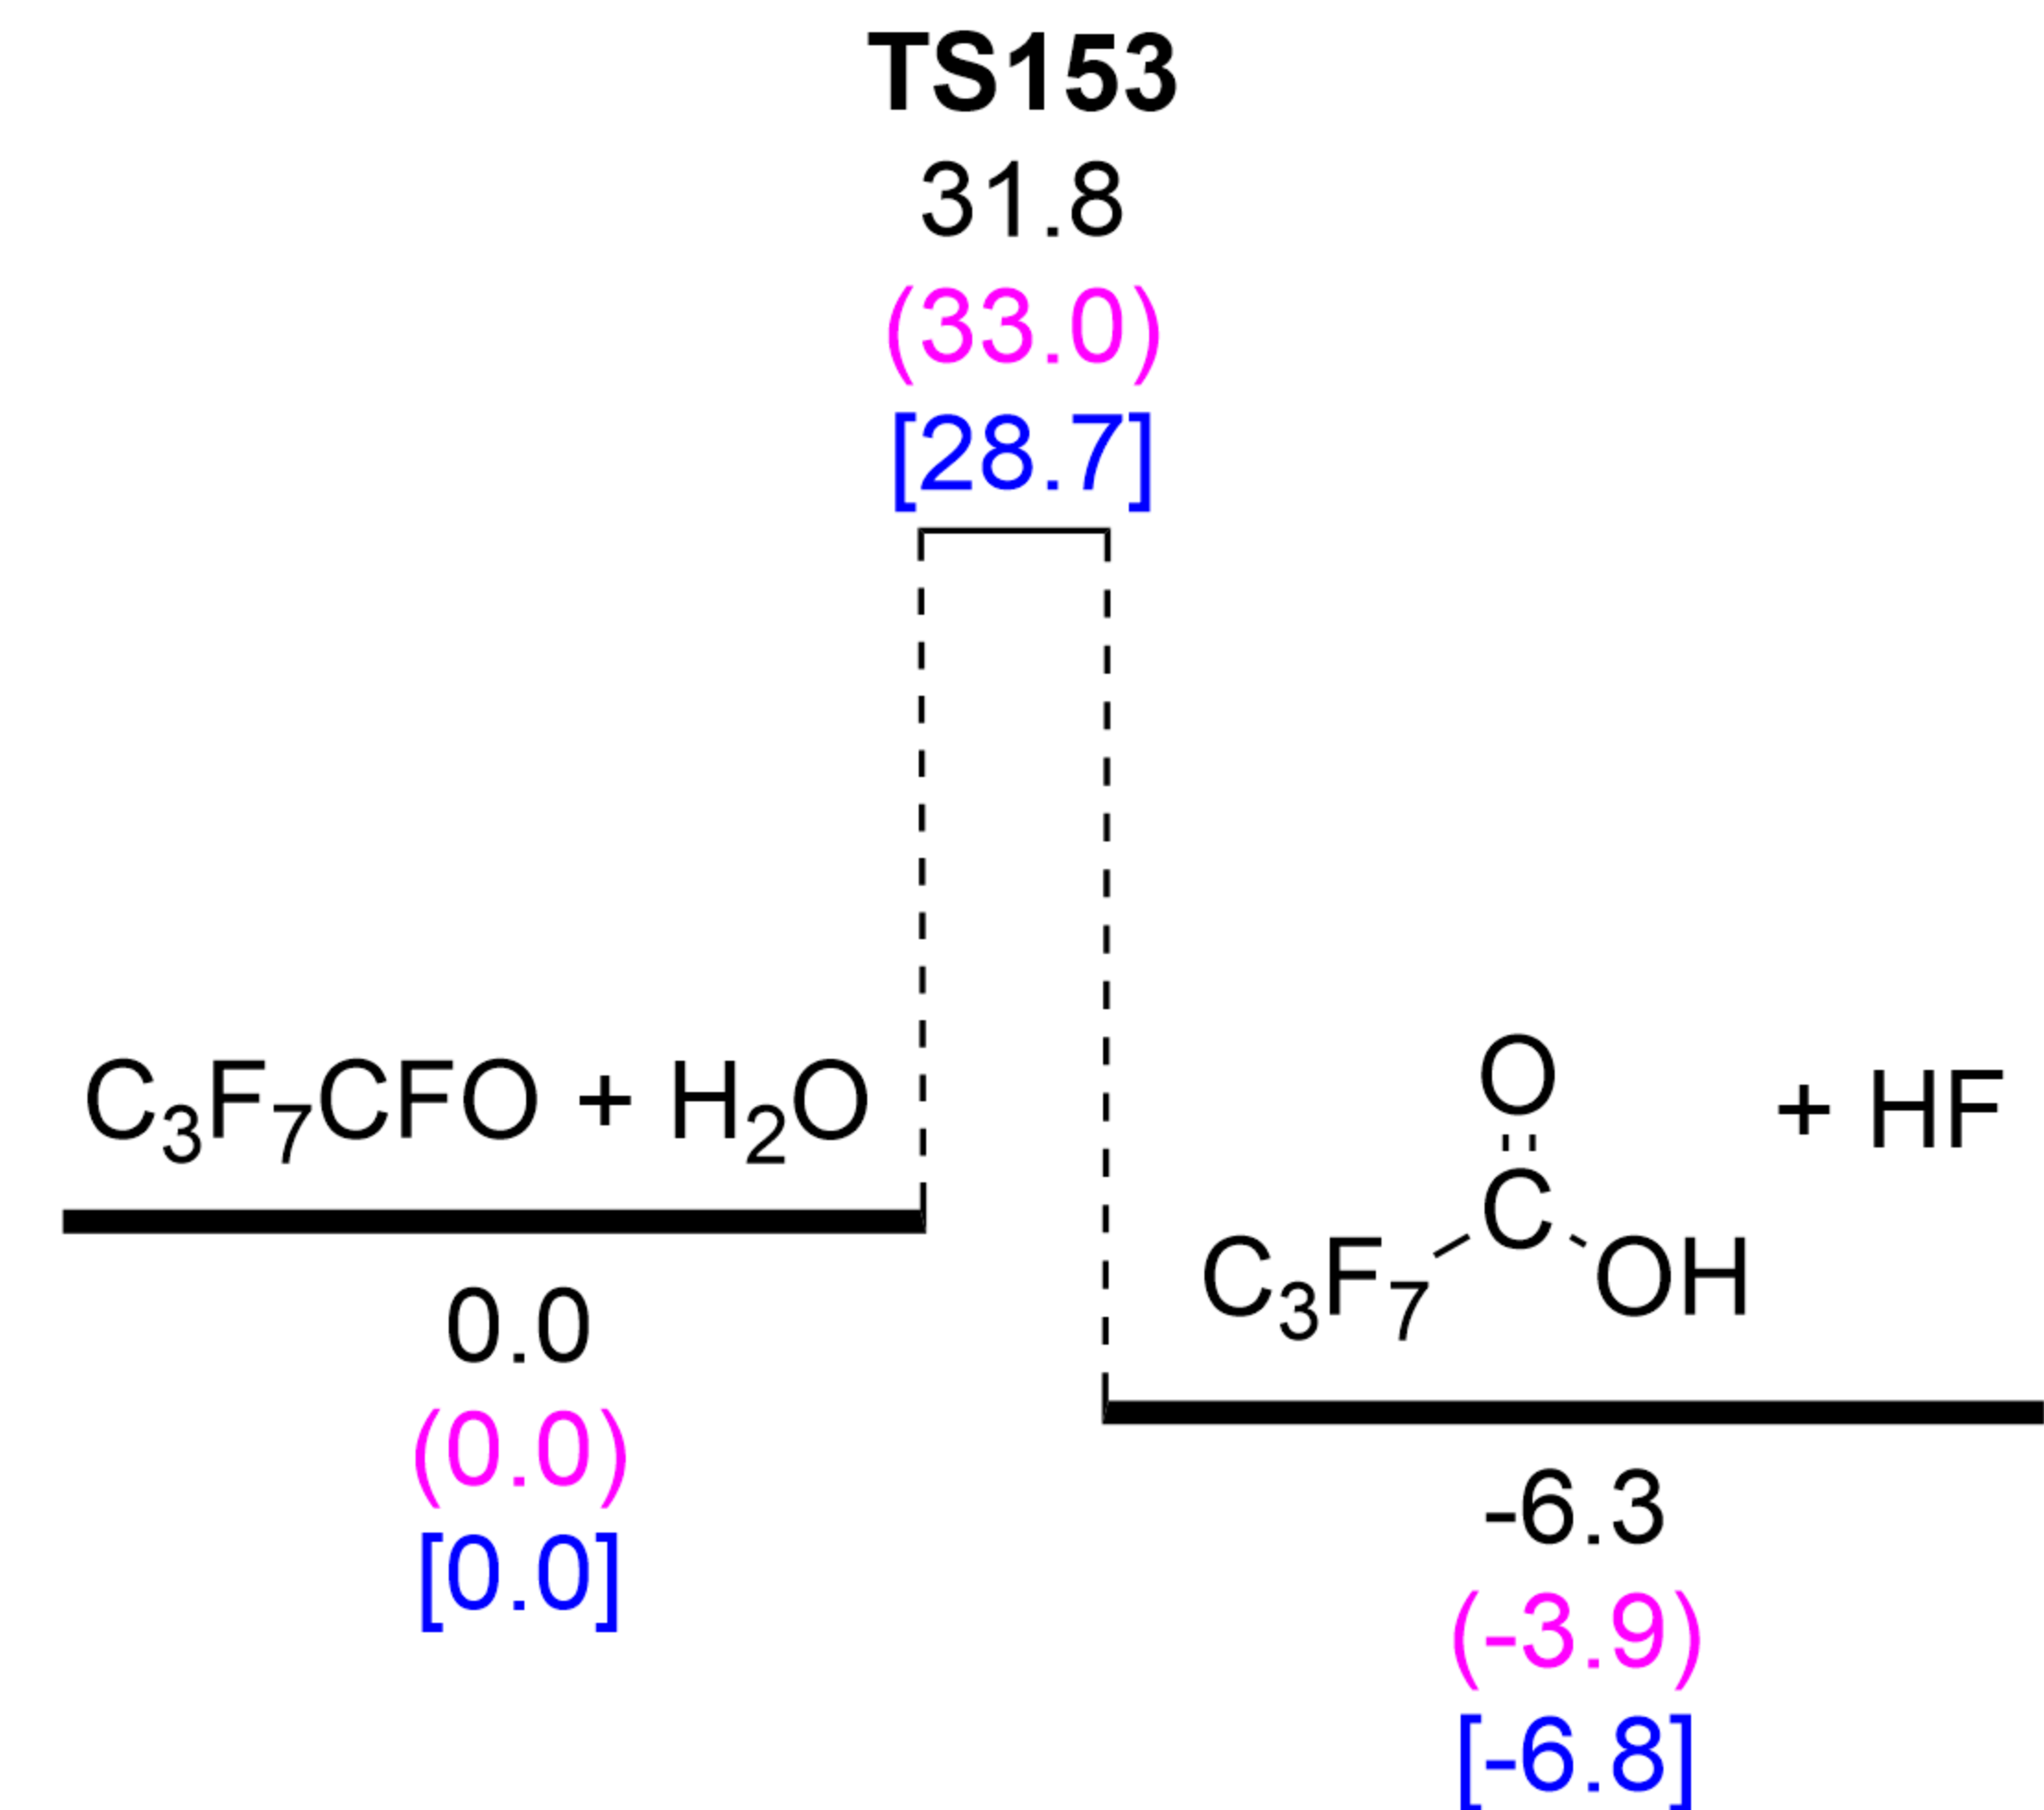

(c)

Supplement: d2em00259k2.zip [file d2em00259k2.zip]

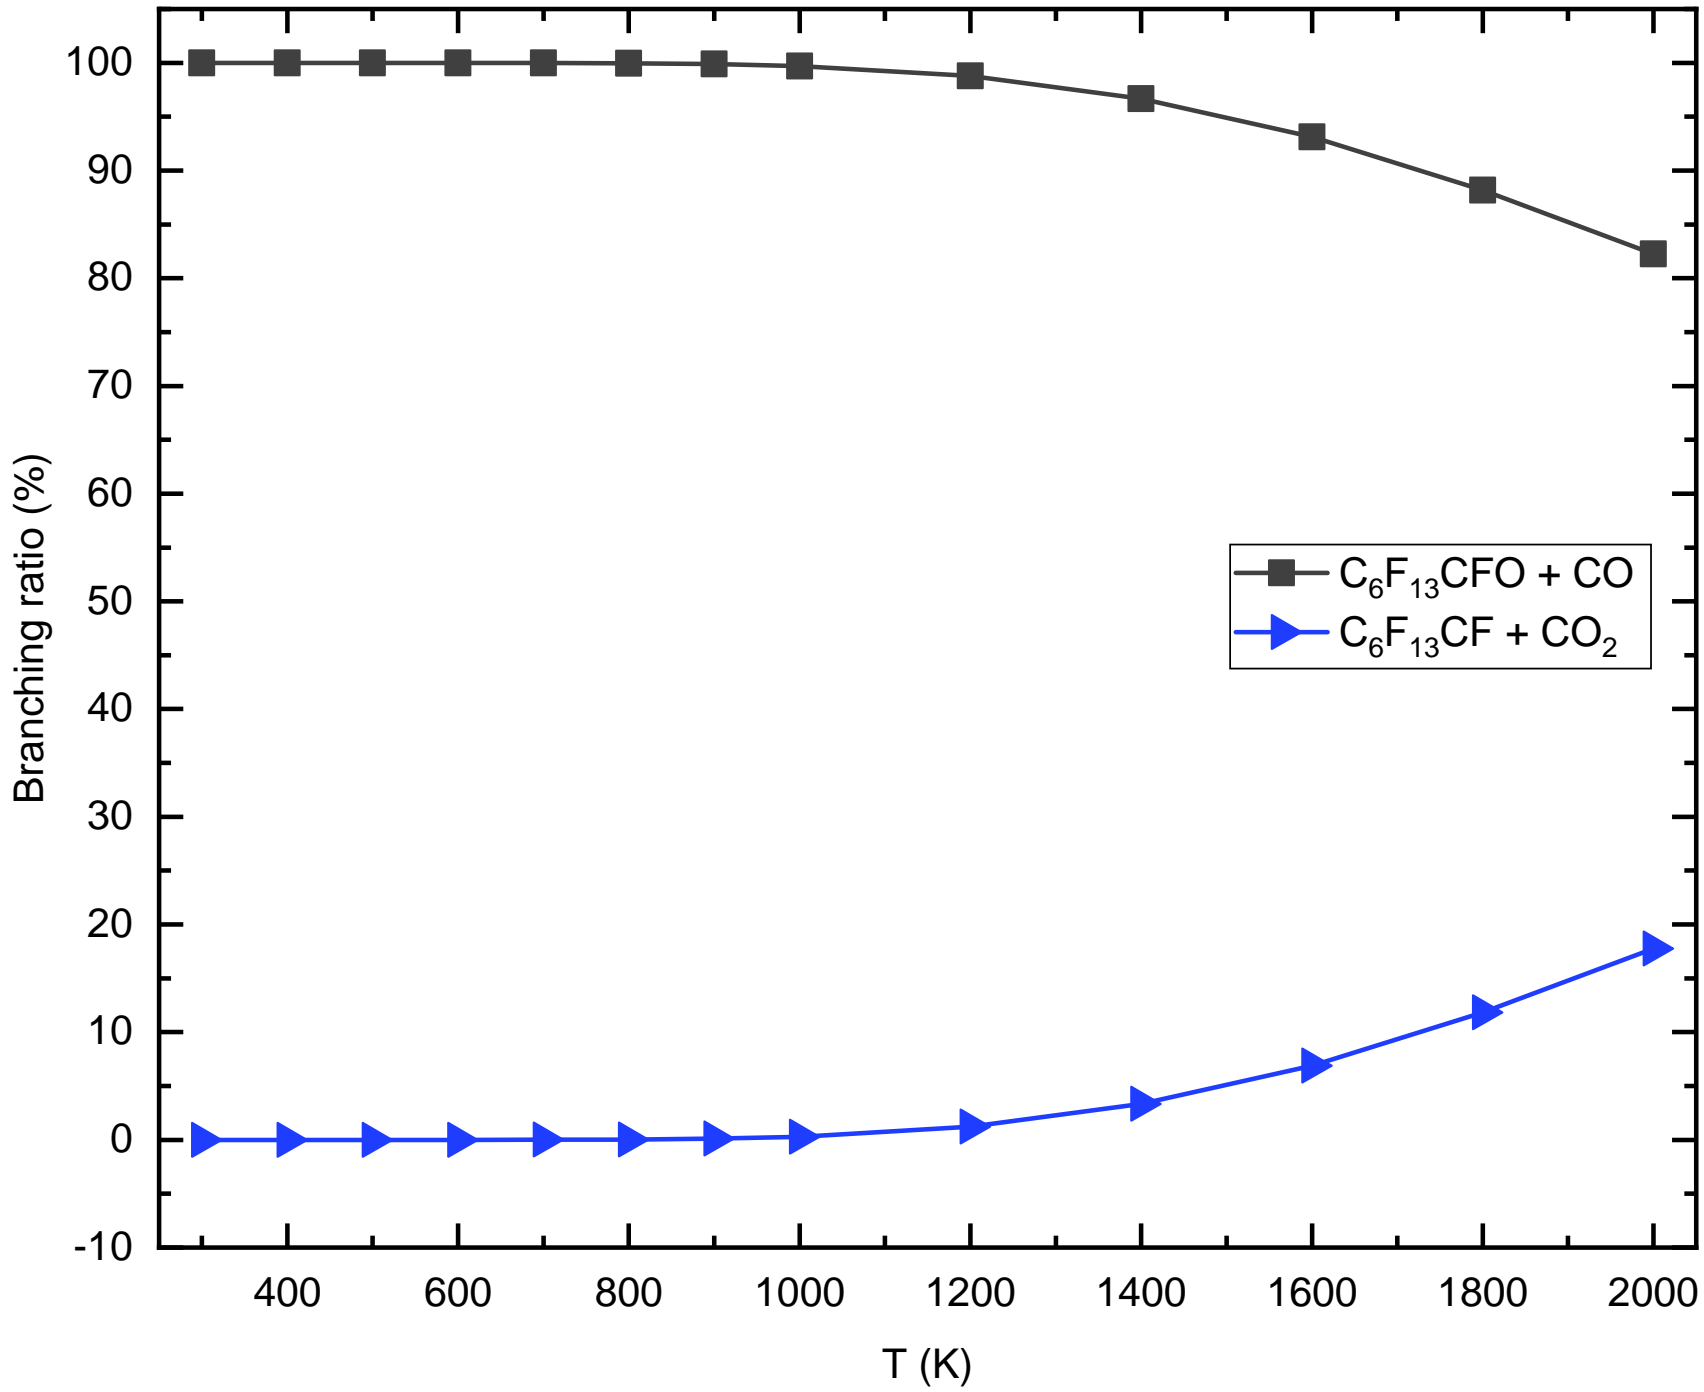

Supplement: d2em00259k2.zip [file d2em00259k2.zip]

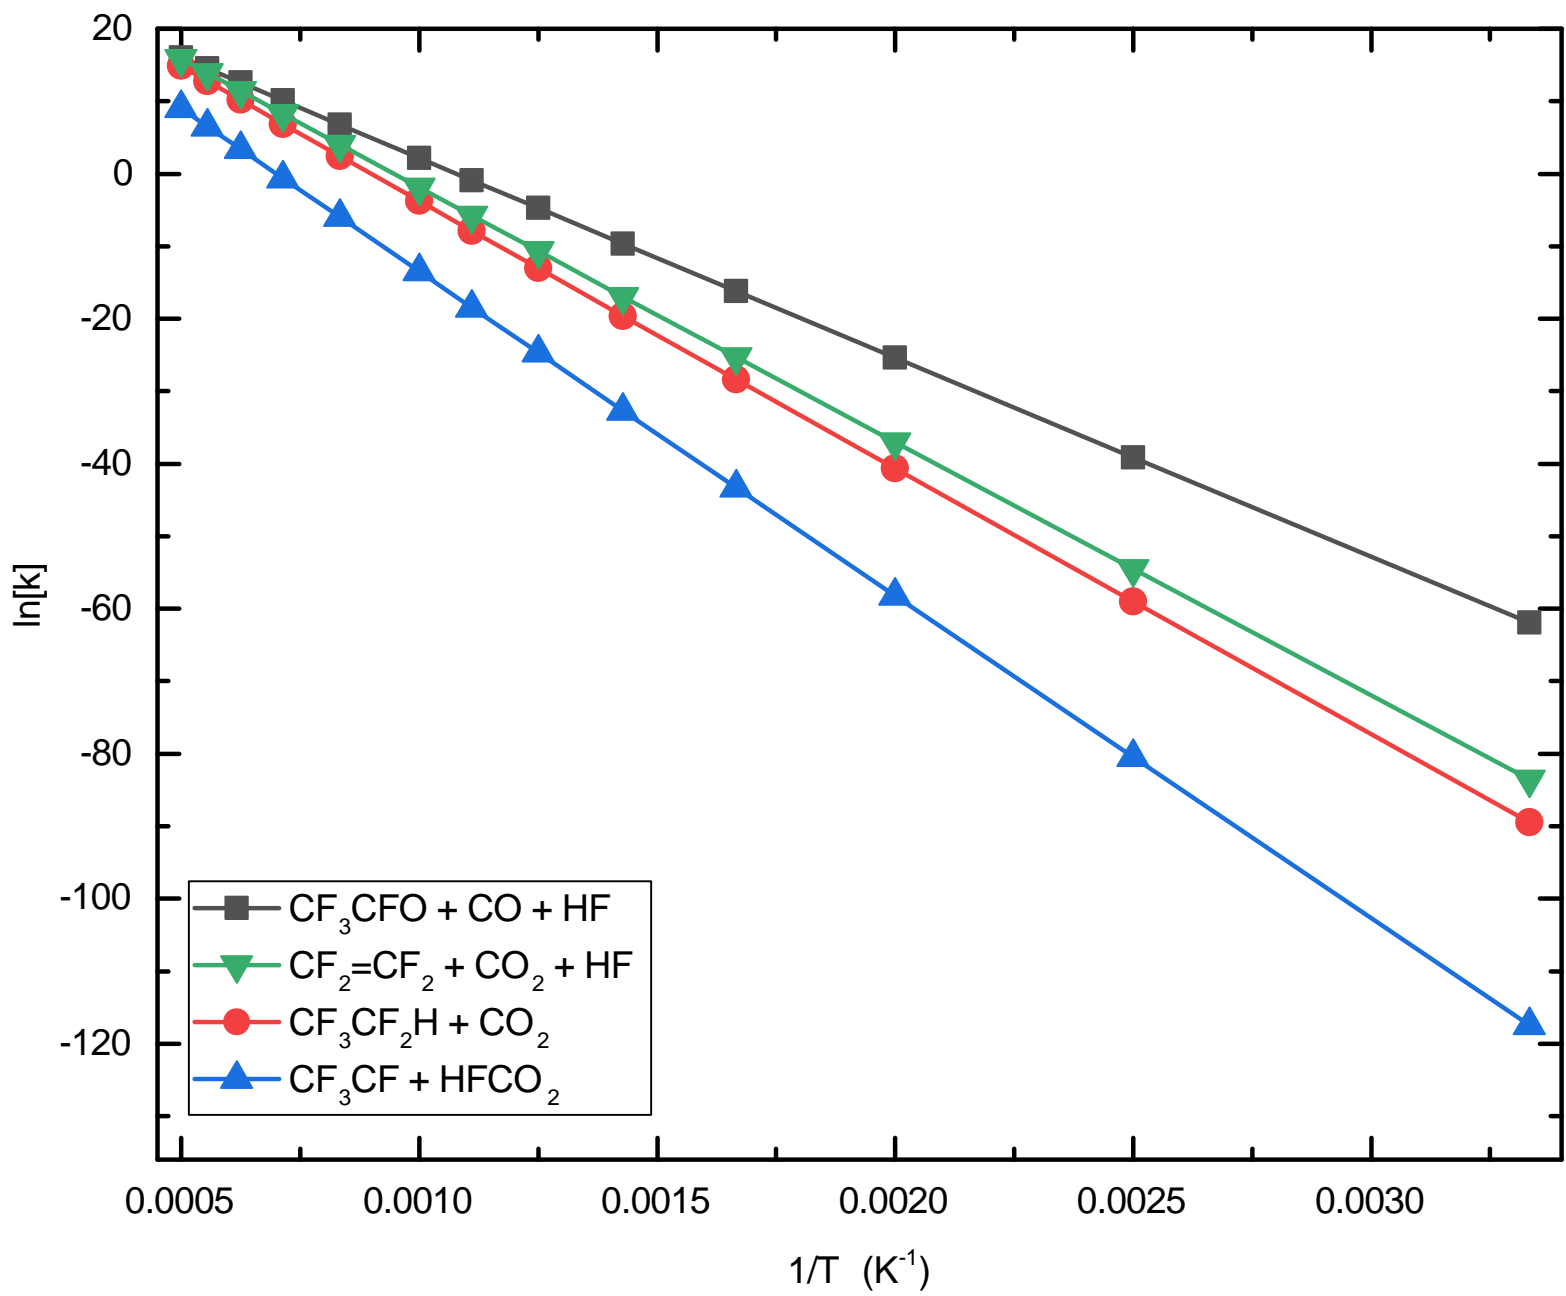

Supplement: d2em00259k2.zip [file d2em00259k2.zip]

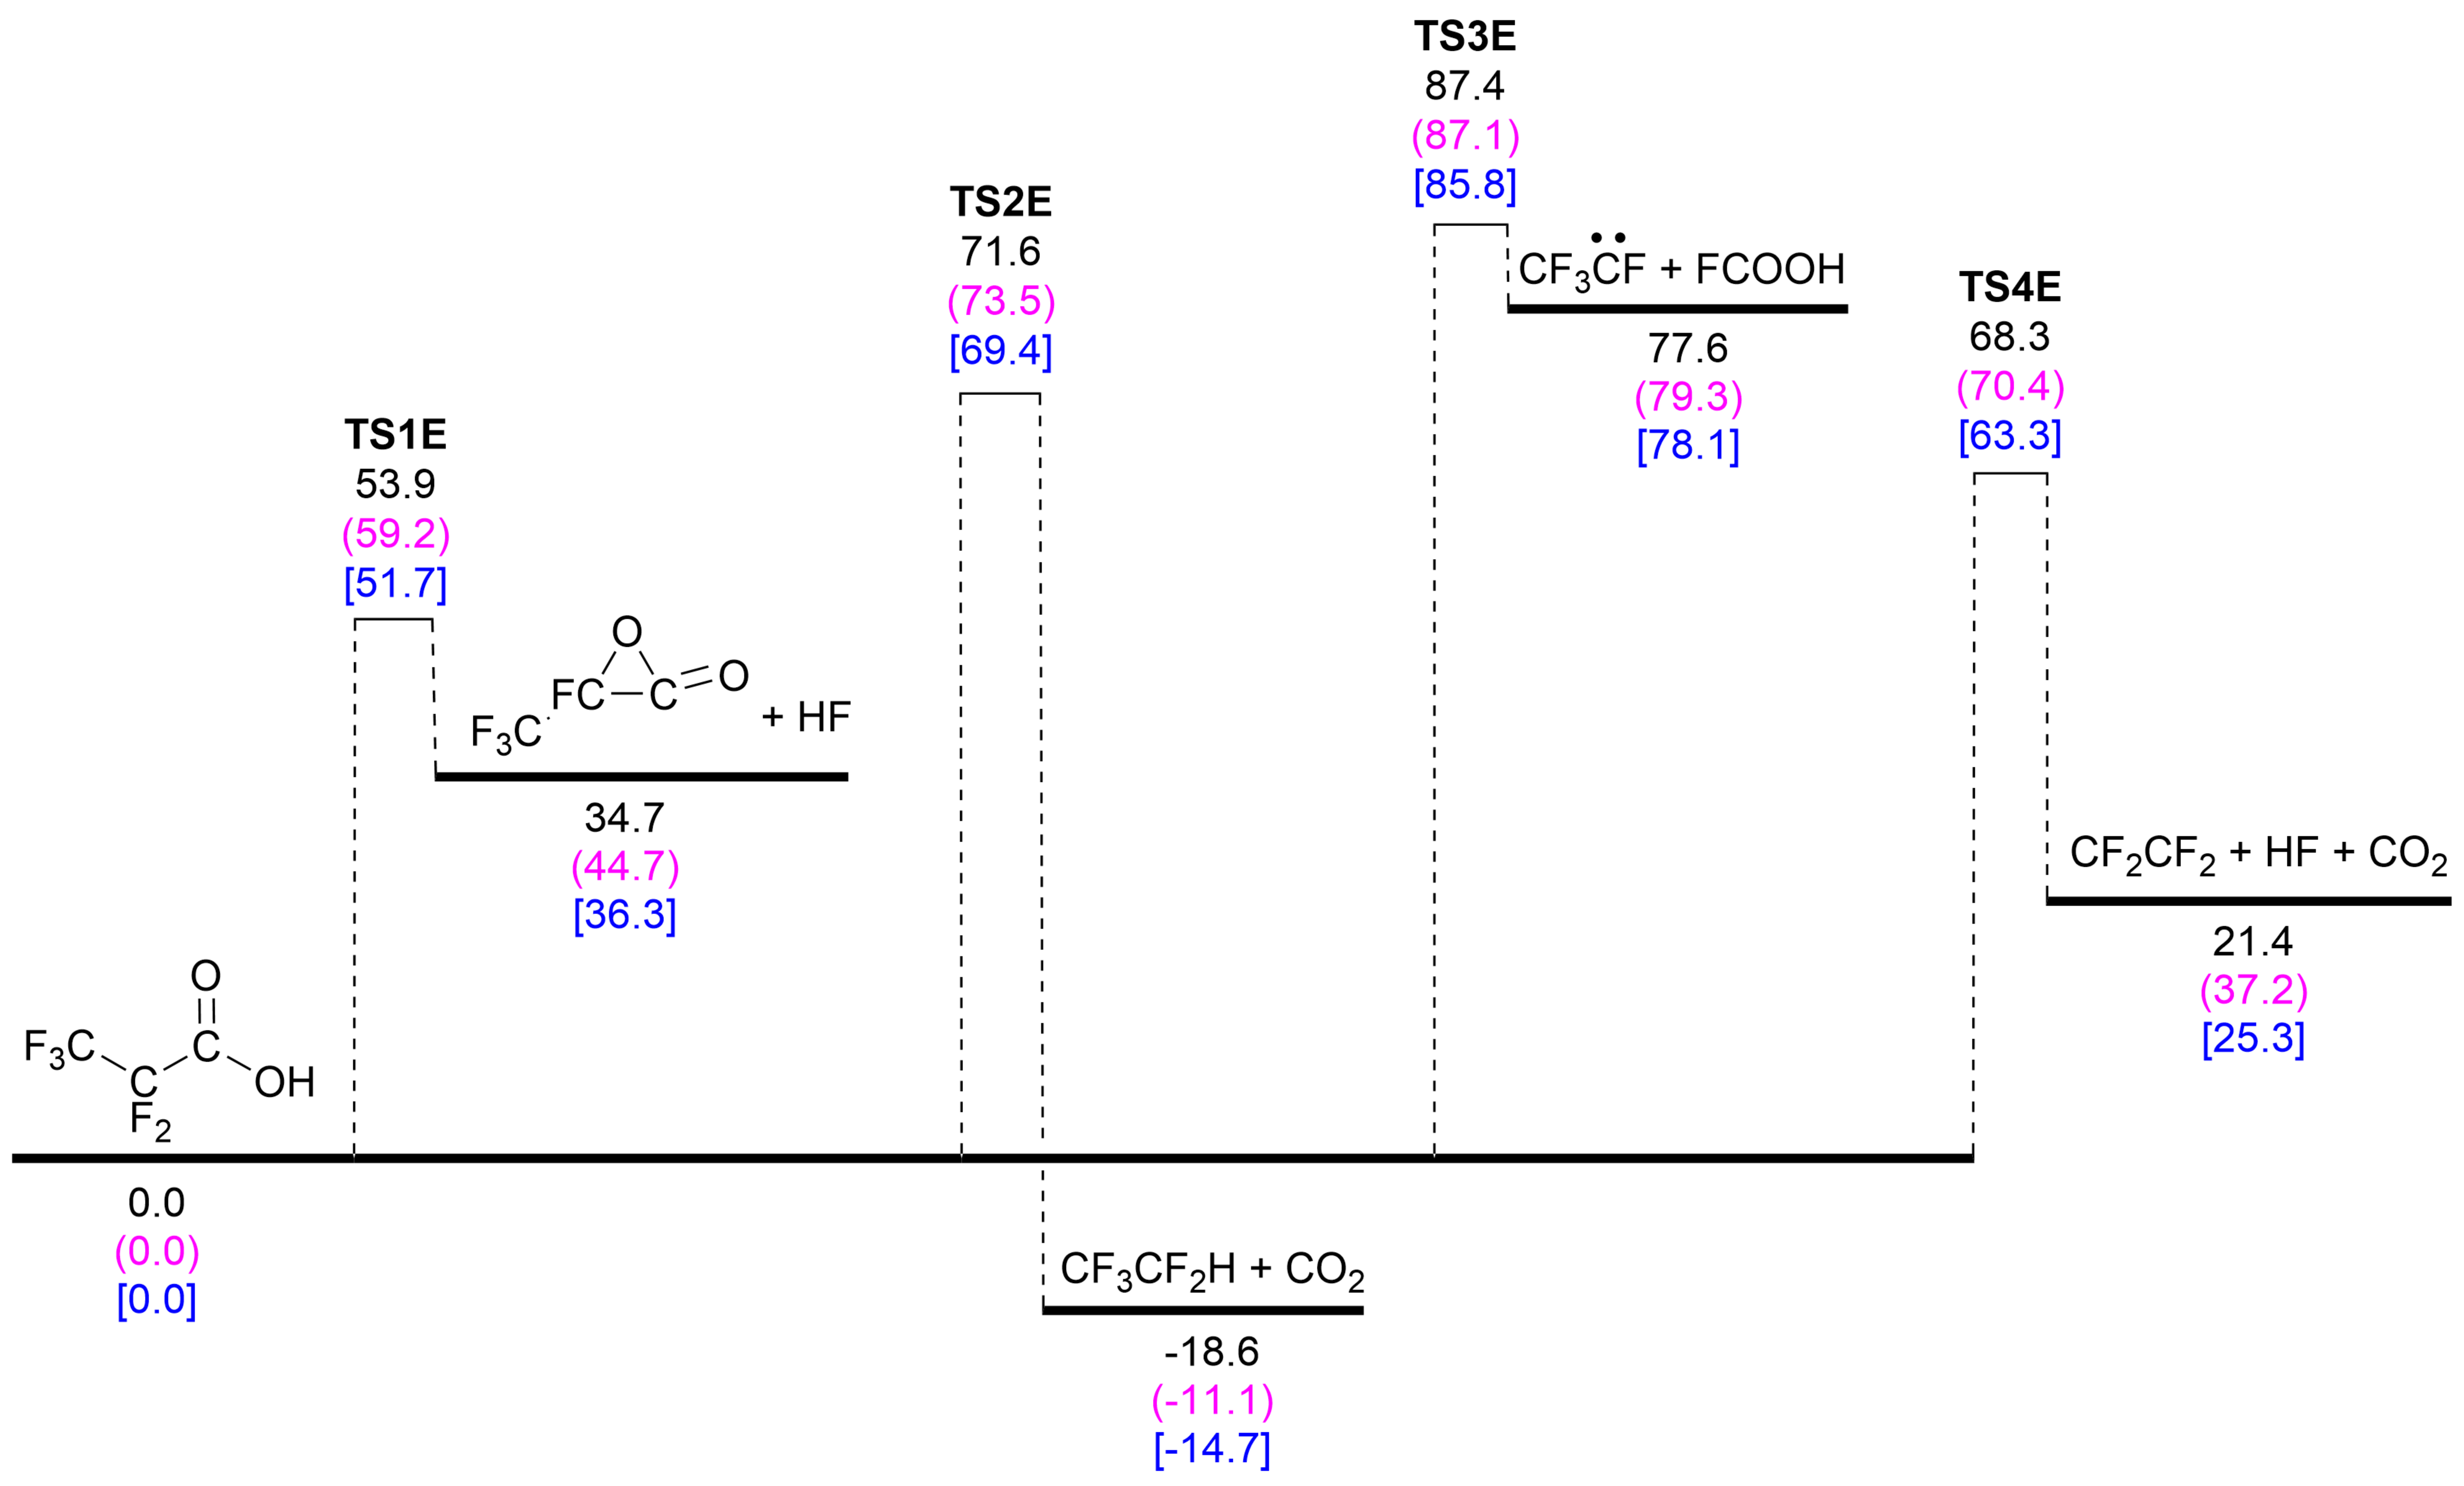

Supplement: d2em00259k2.zip [file d2em00259k2.zip]

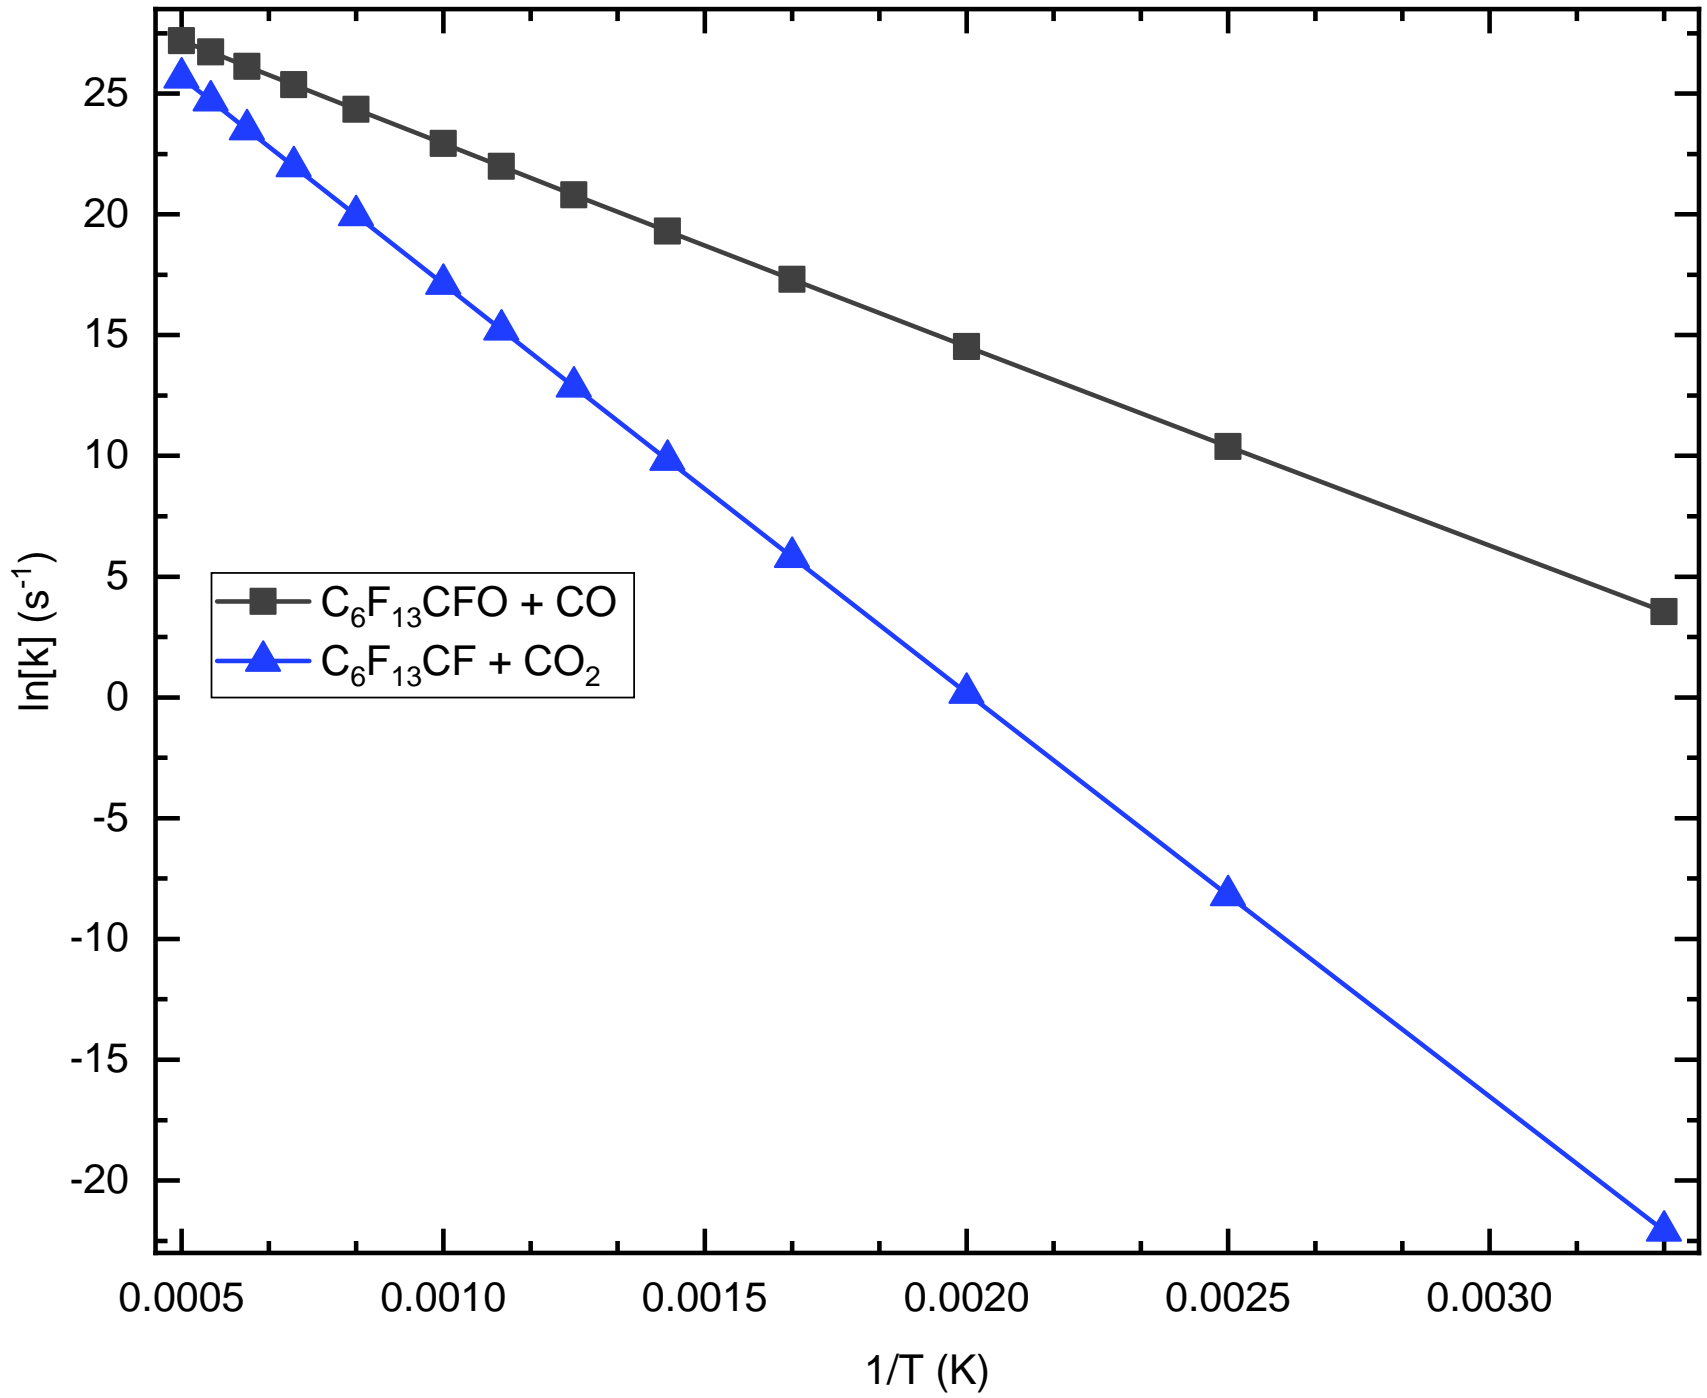

Supplement: d2em00259k2.zip [file d2em00259k2.zip]

**TSO1a**

59.1

(65.3)

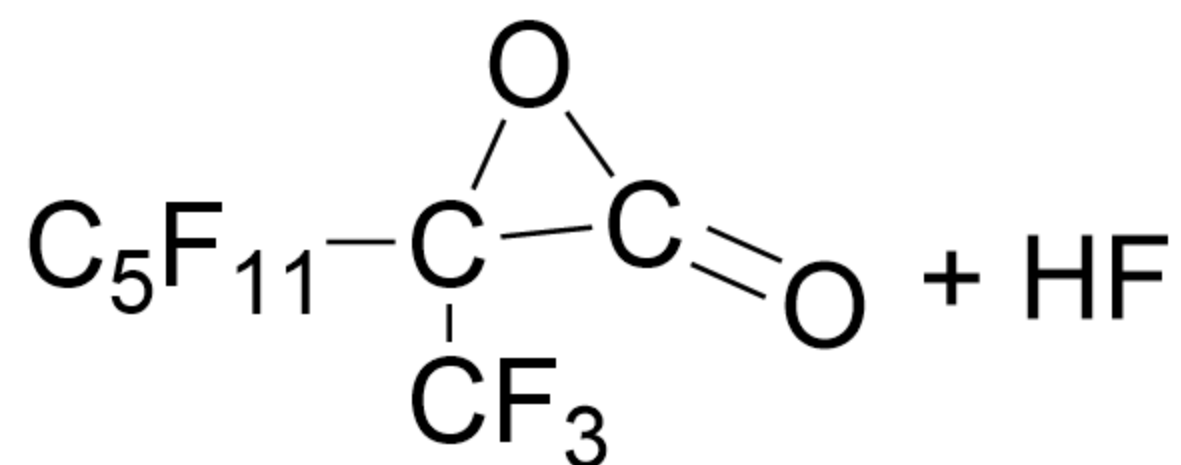

32.2

(43.5)

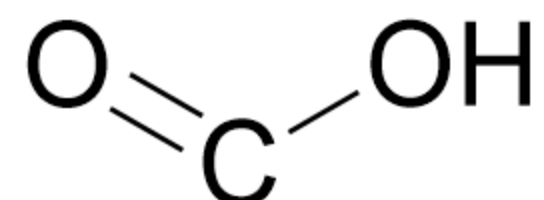

0.0

(0.0)

**TSO3a**

56.6

(59.4)

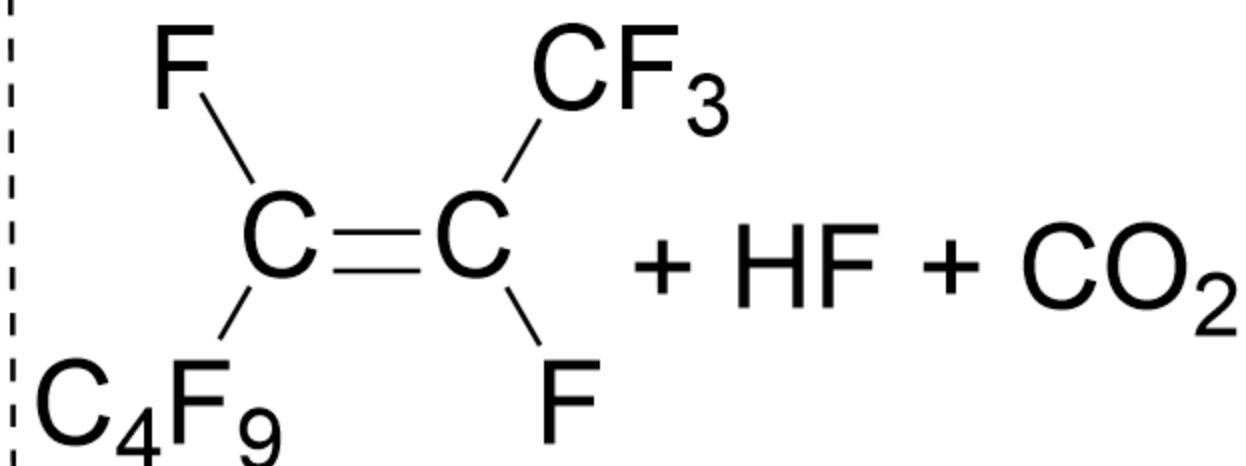

0.0

(21.8)

Supplement: d2em00259k2.zip [file d2em00259k2.zip]

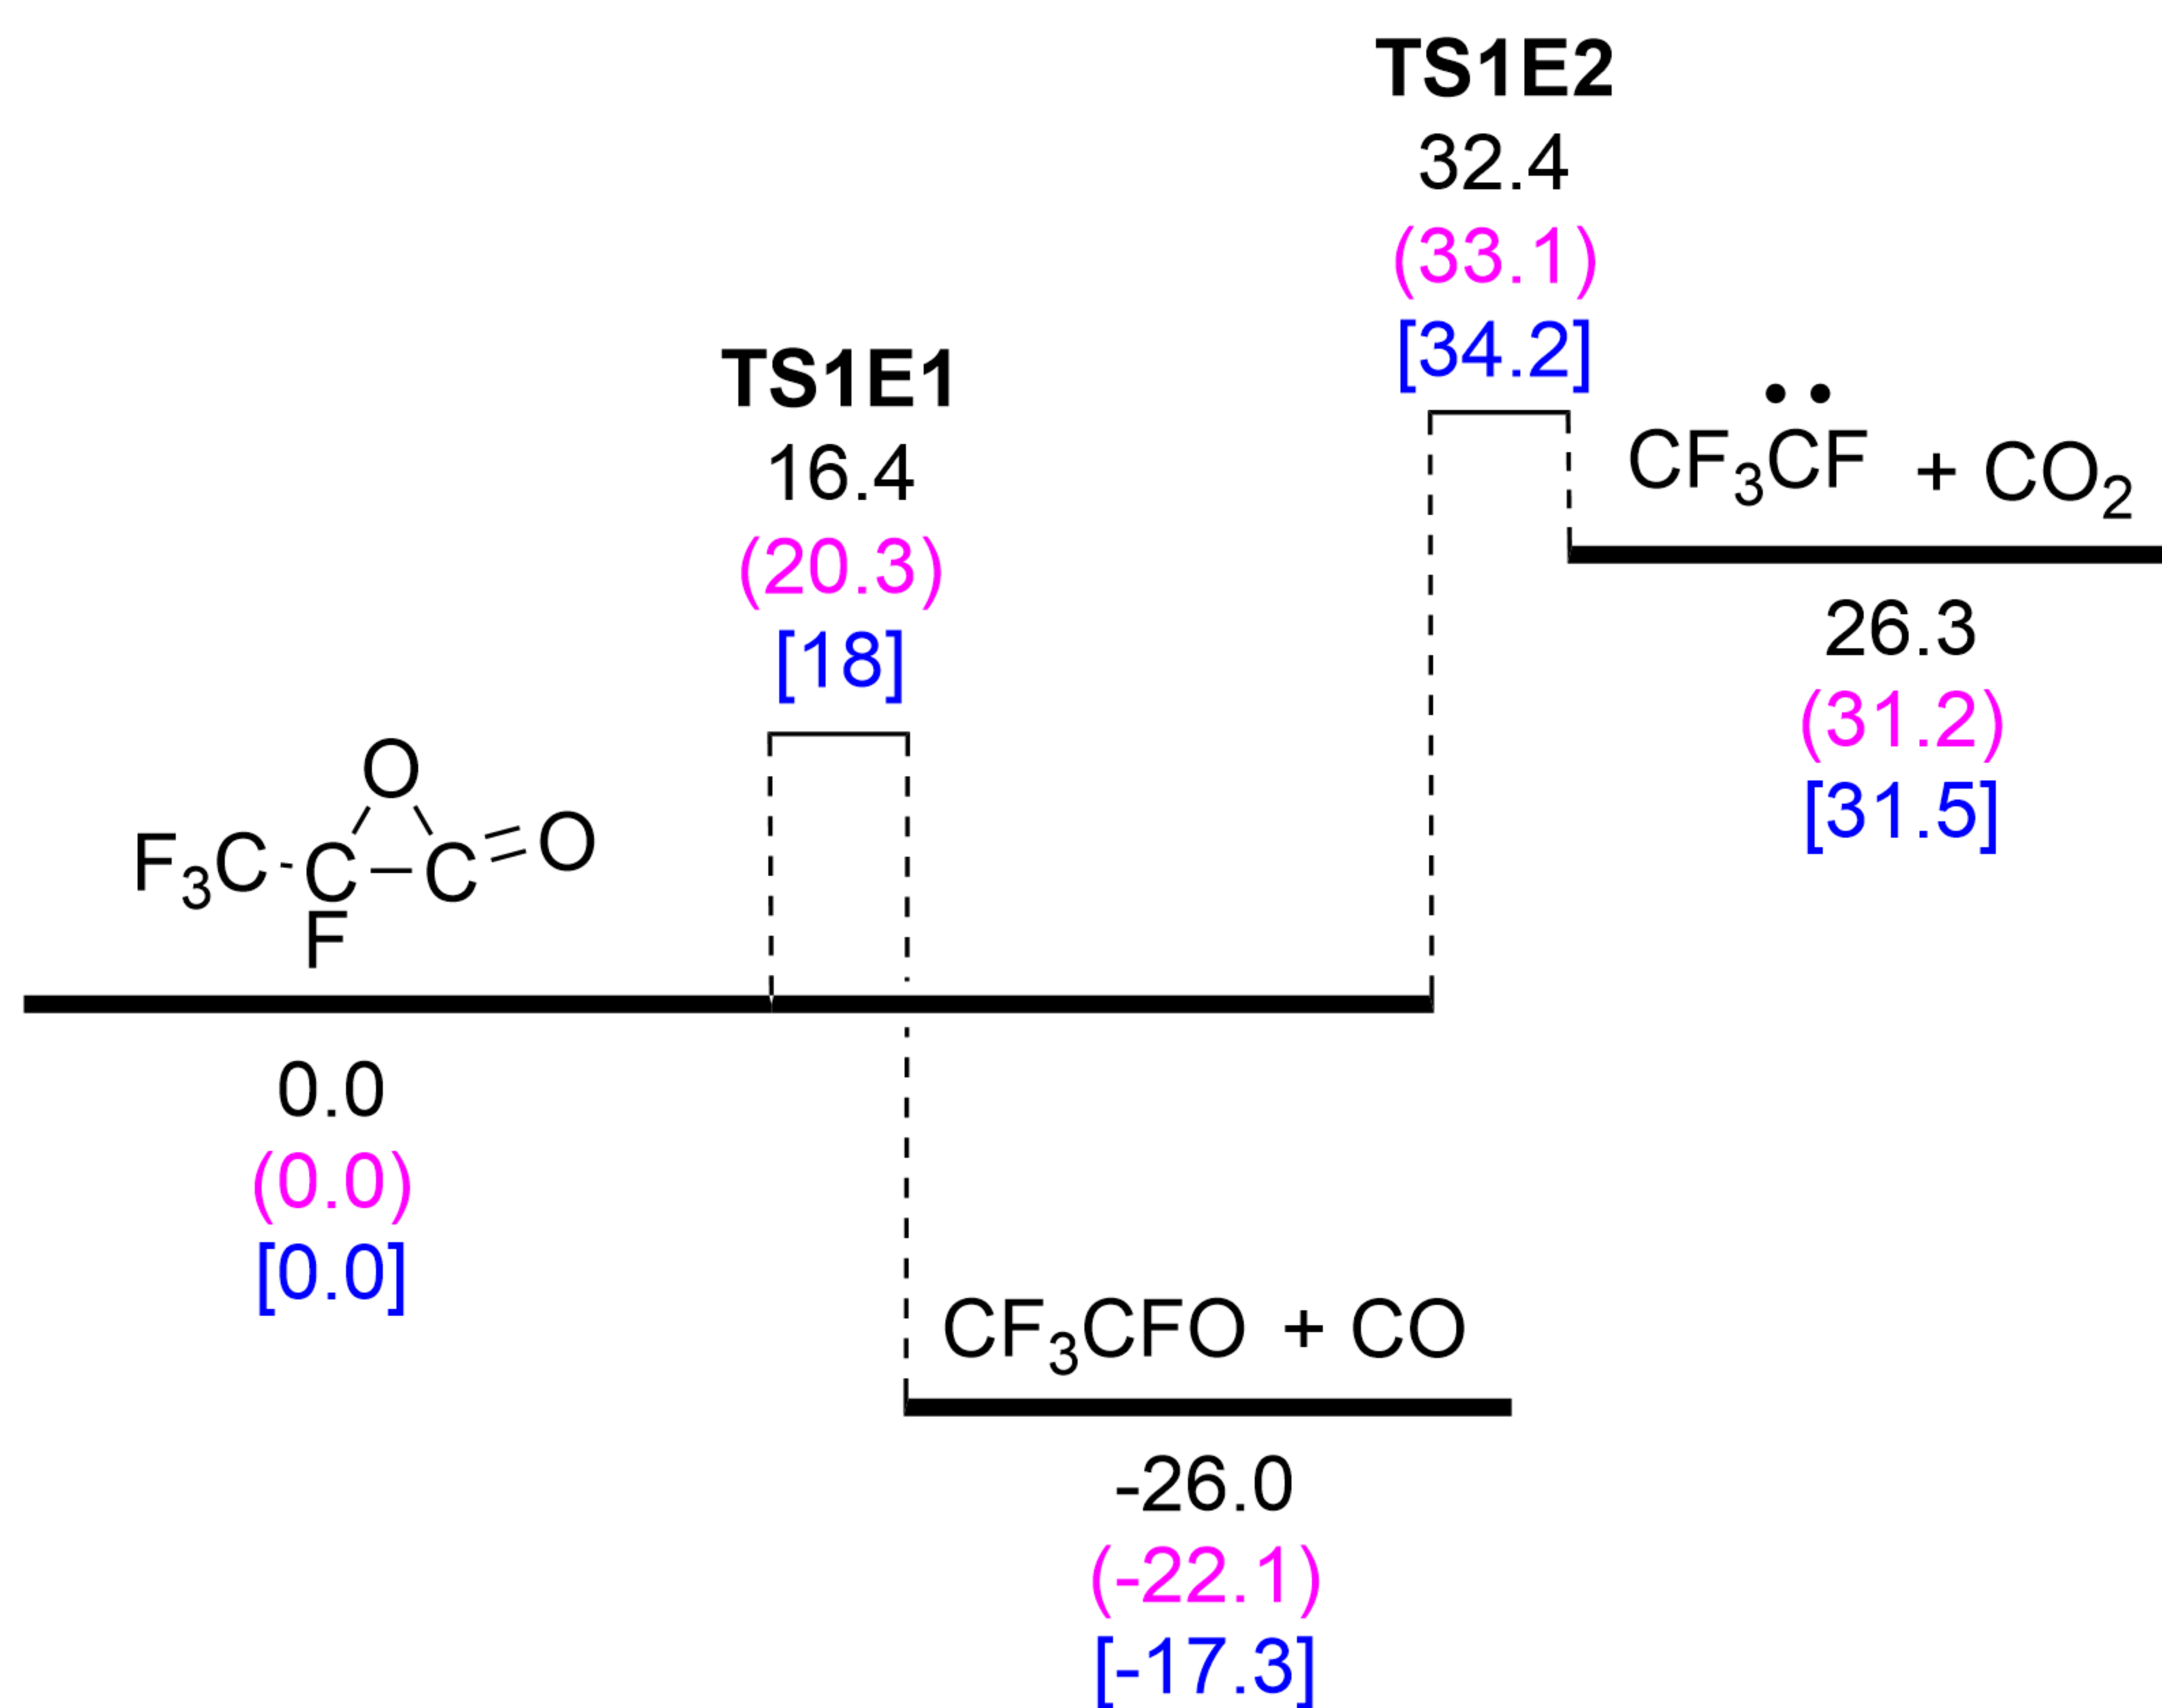

(a)

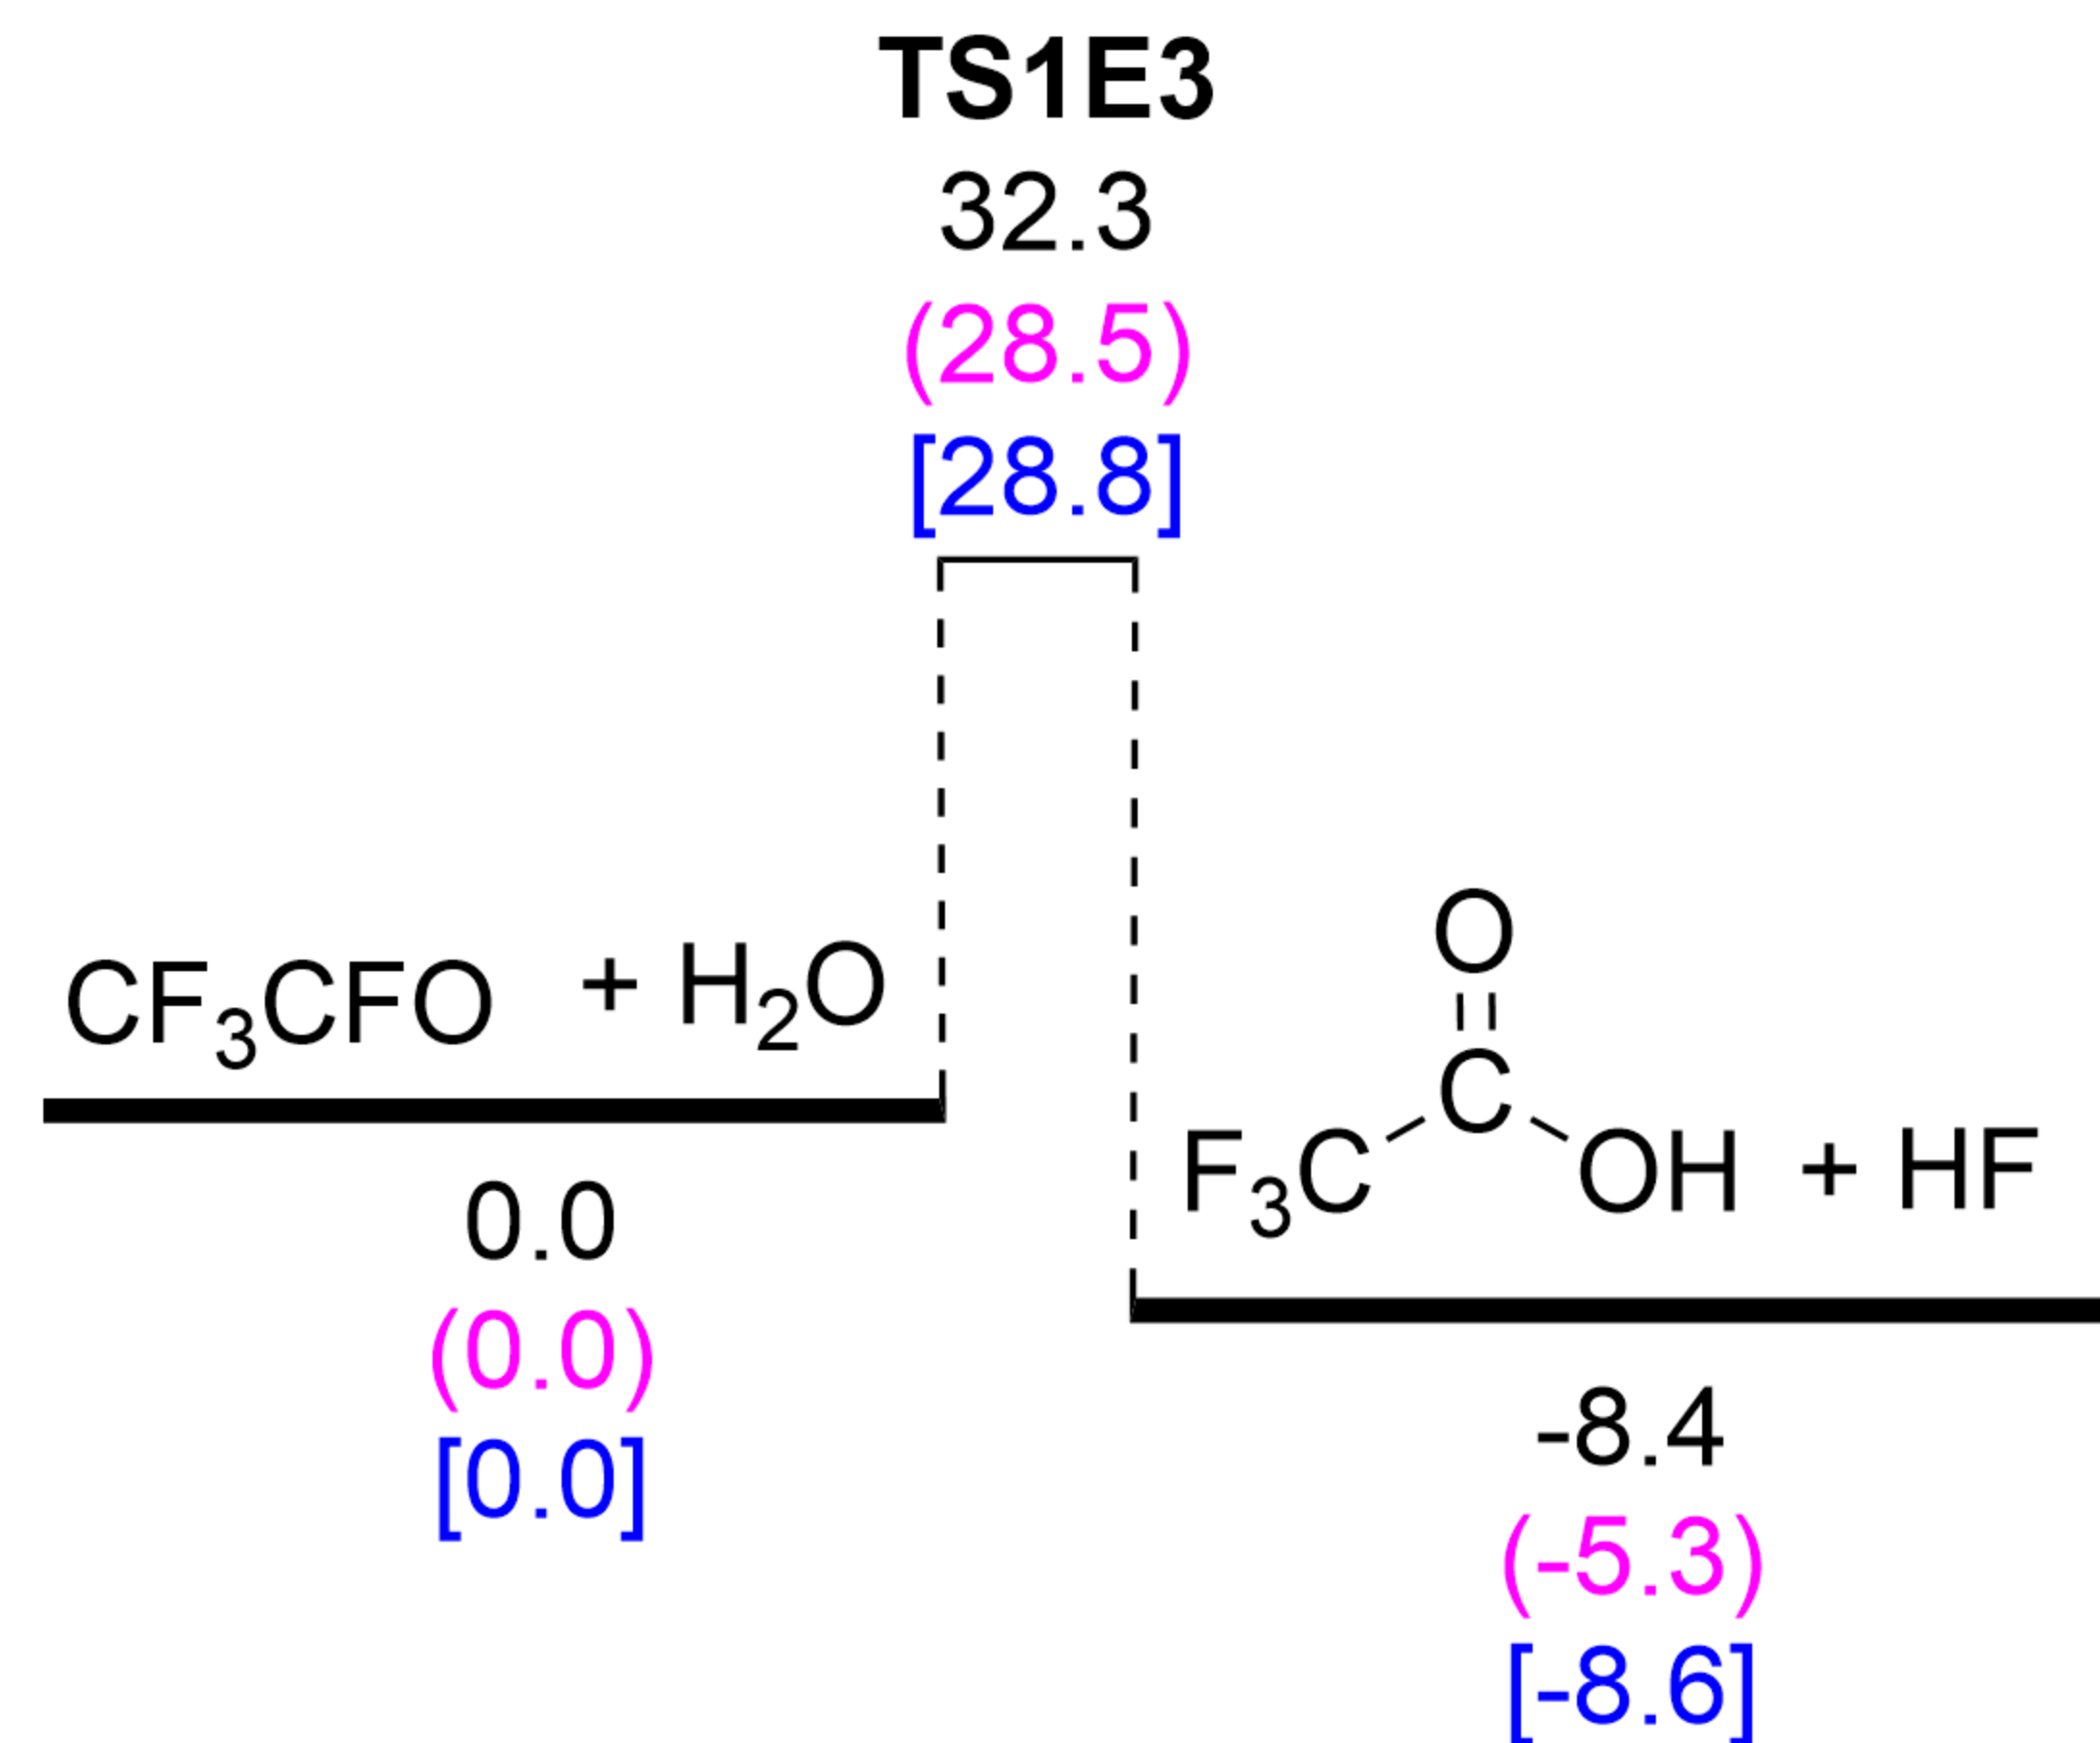

(b)

Supplement: d2em00259k2.zip [file d2em00259k2.zip]

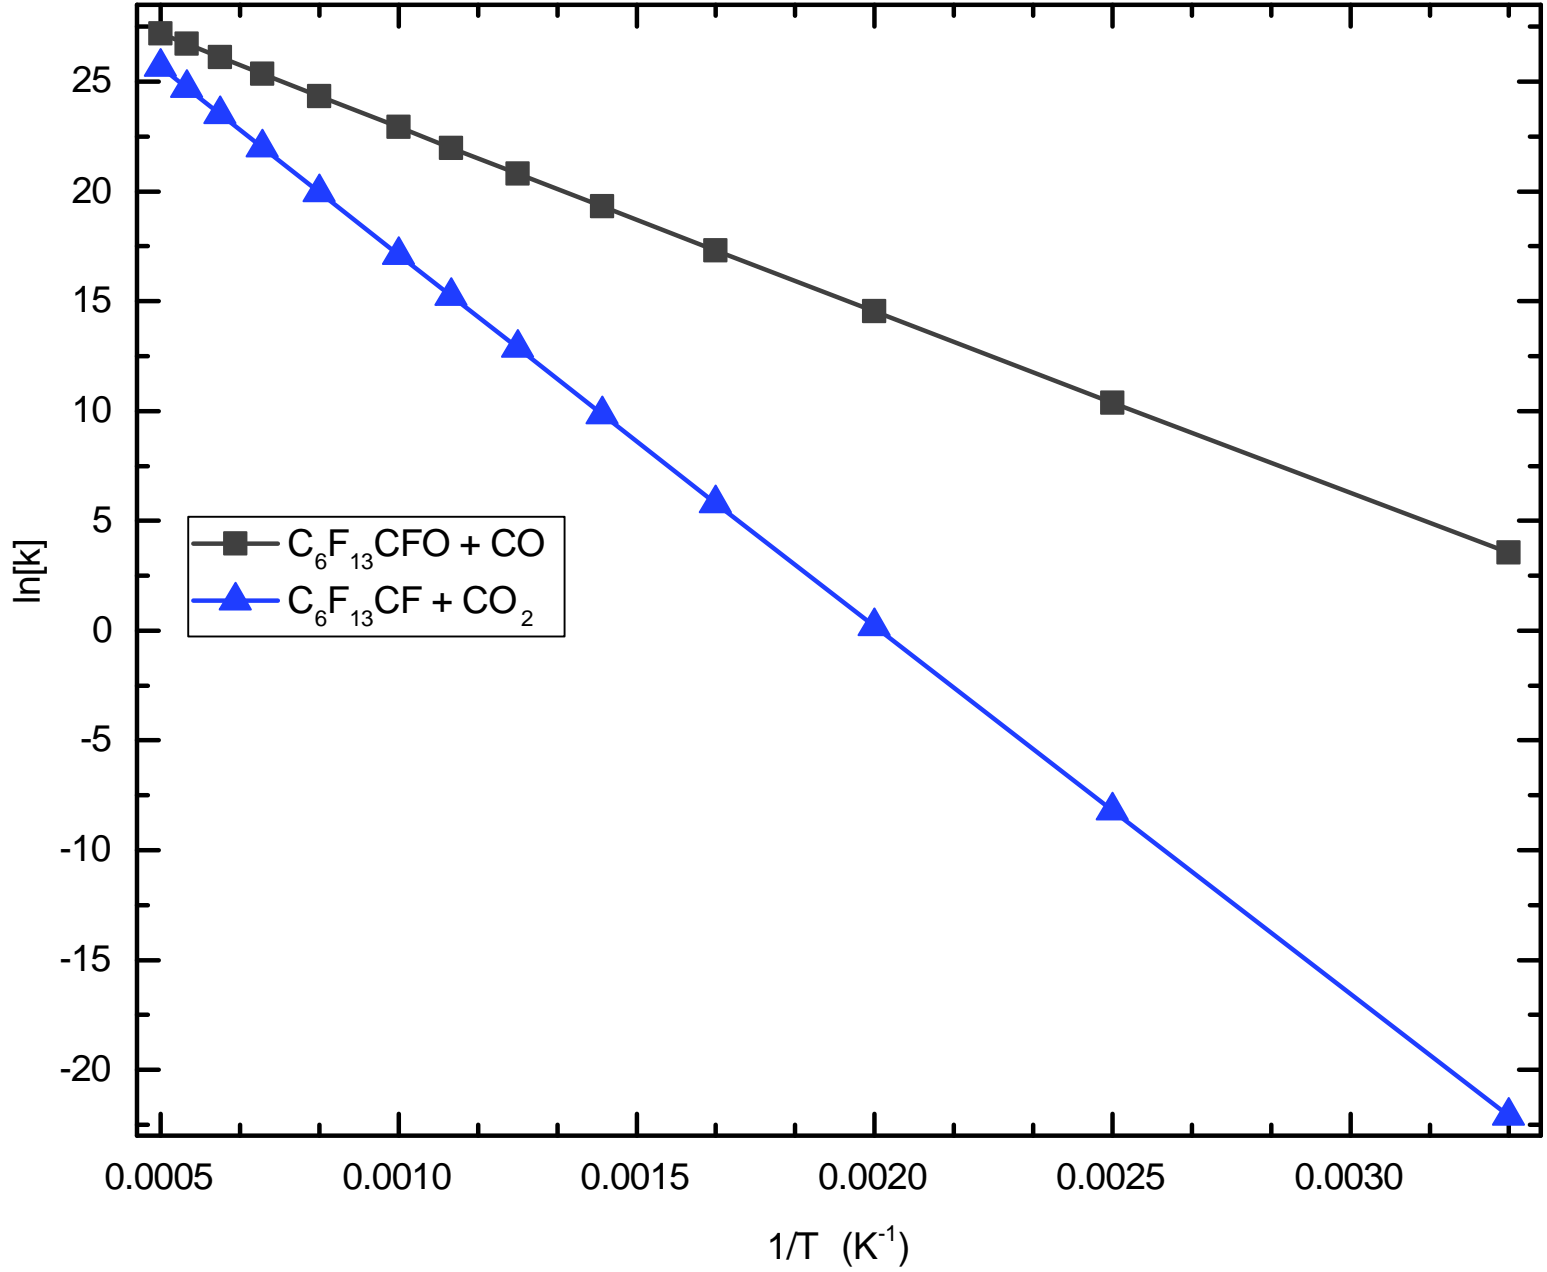

Supplement: d2em00259k2.zip [file d2em00259k2.zip]

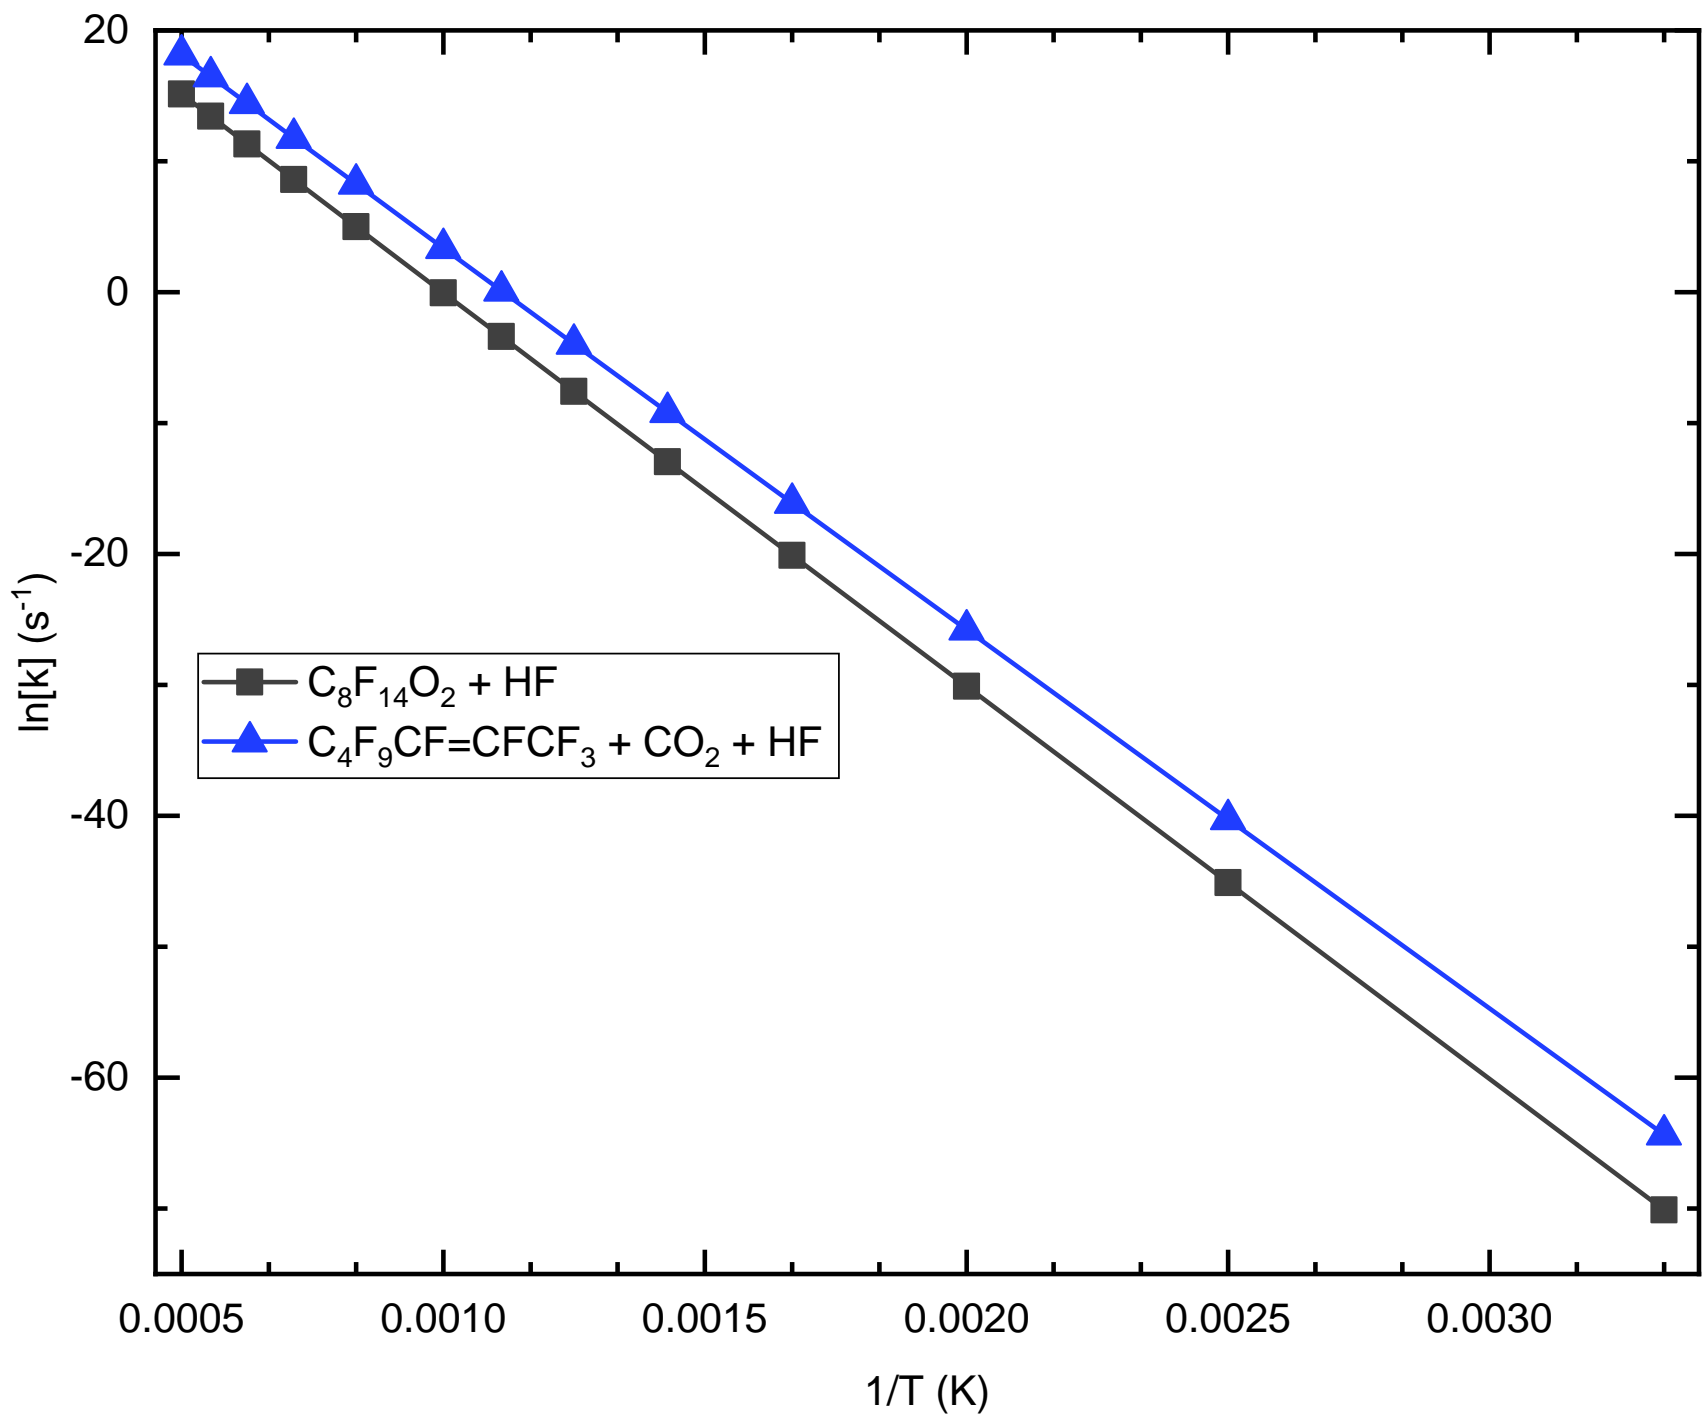

Supplement: d2em00259k2.zip [file d2em00259k2.zip]

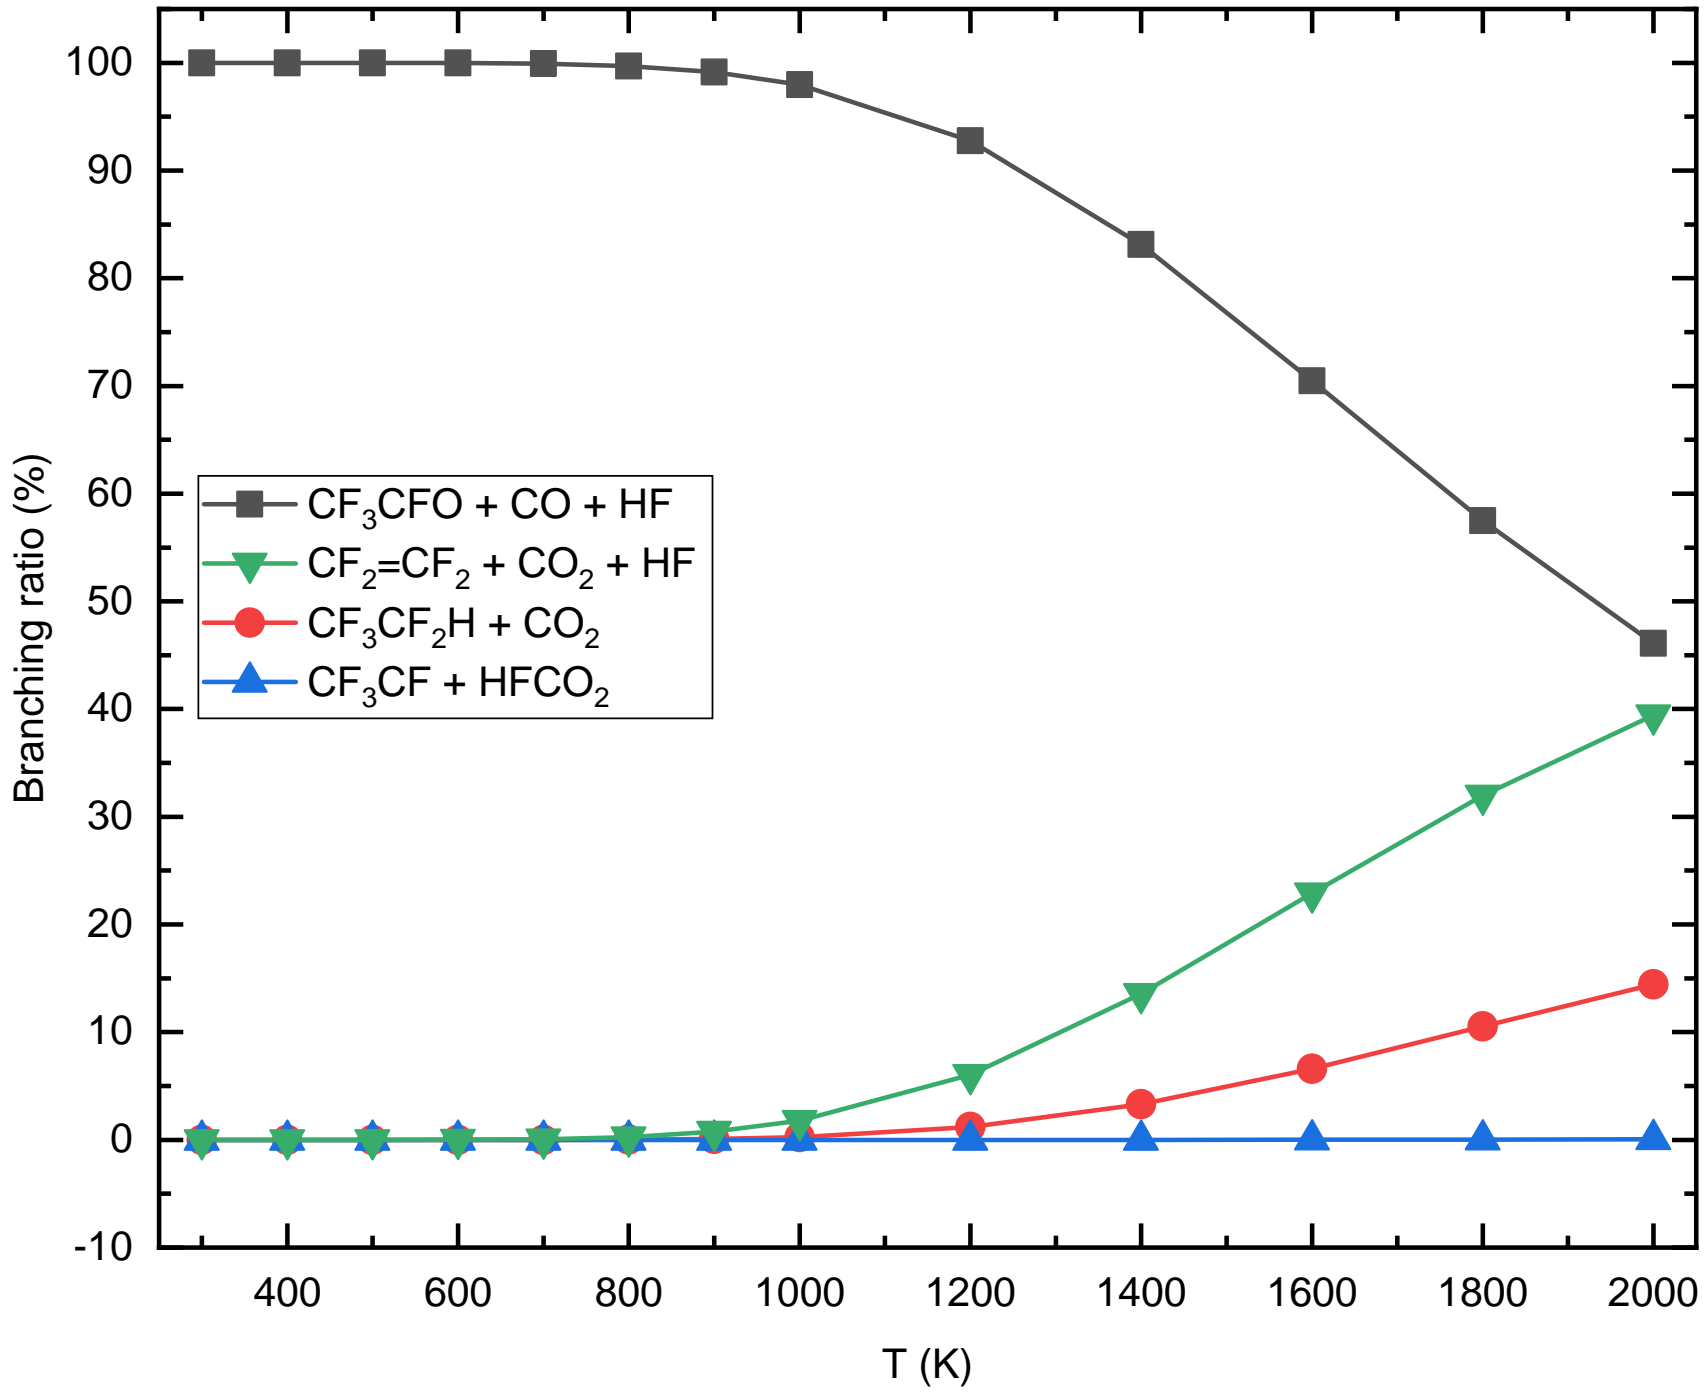

Supplement: d2em00259k2.zip [file d2em00259k2.zip]

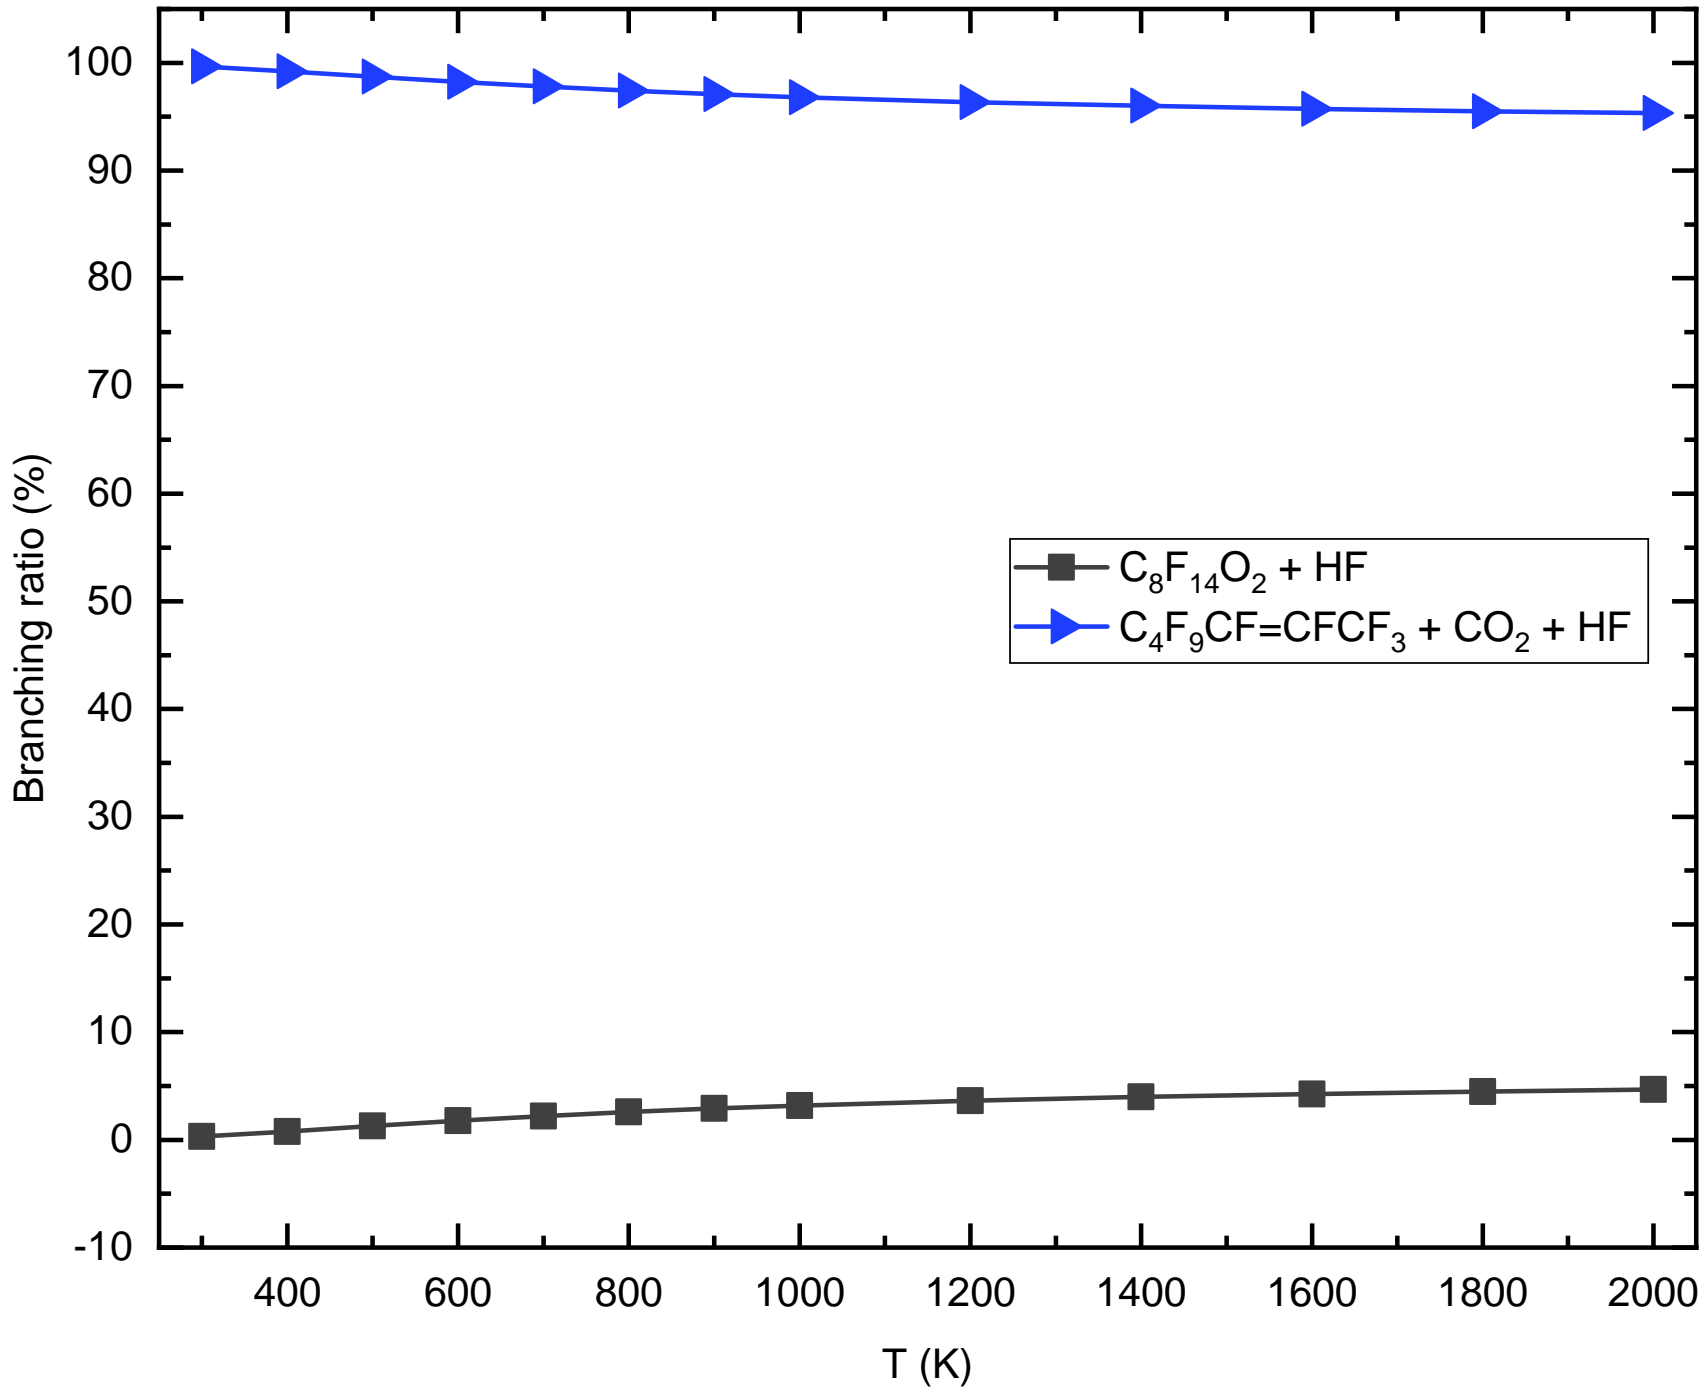

Supplement: d2em00259k2.zip [file d2em00259k2.zip]

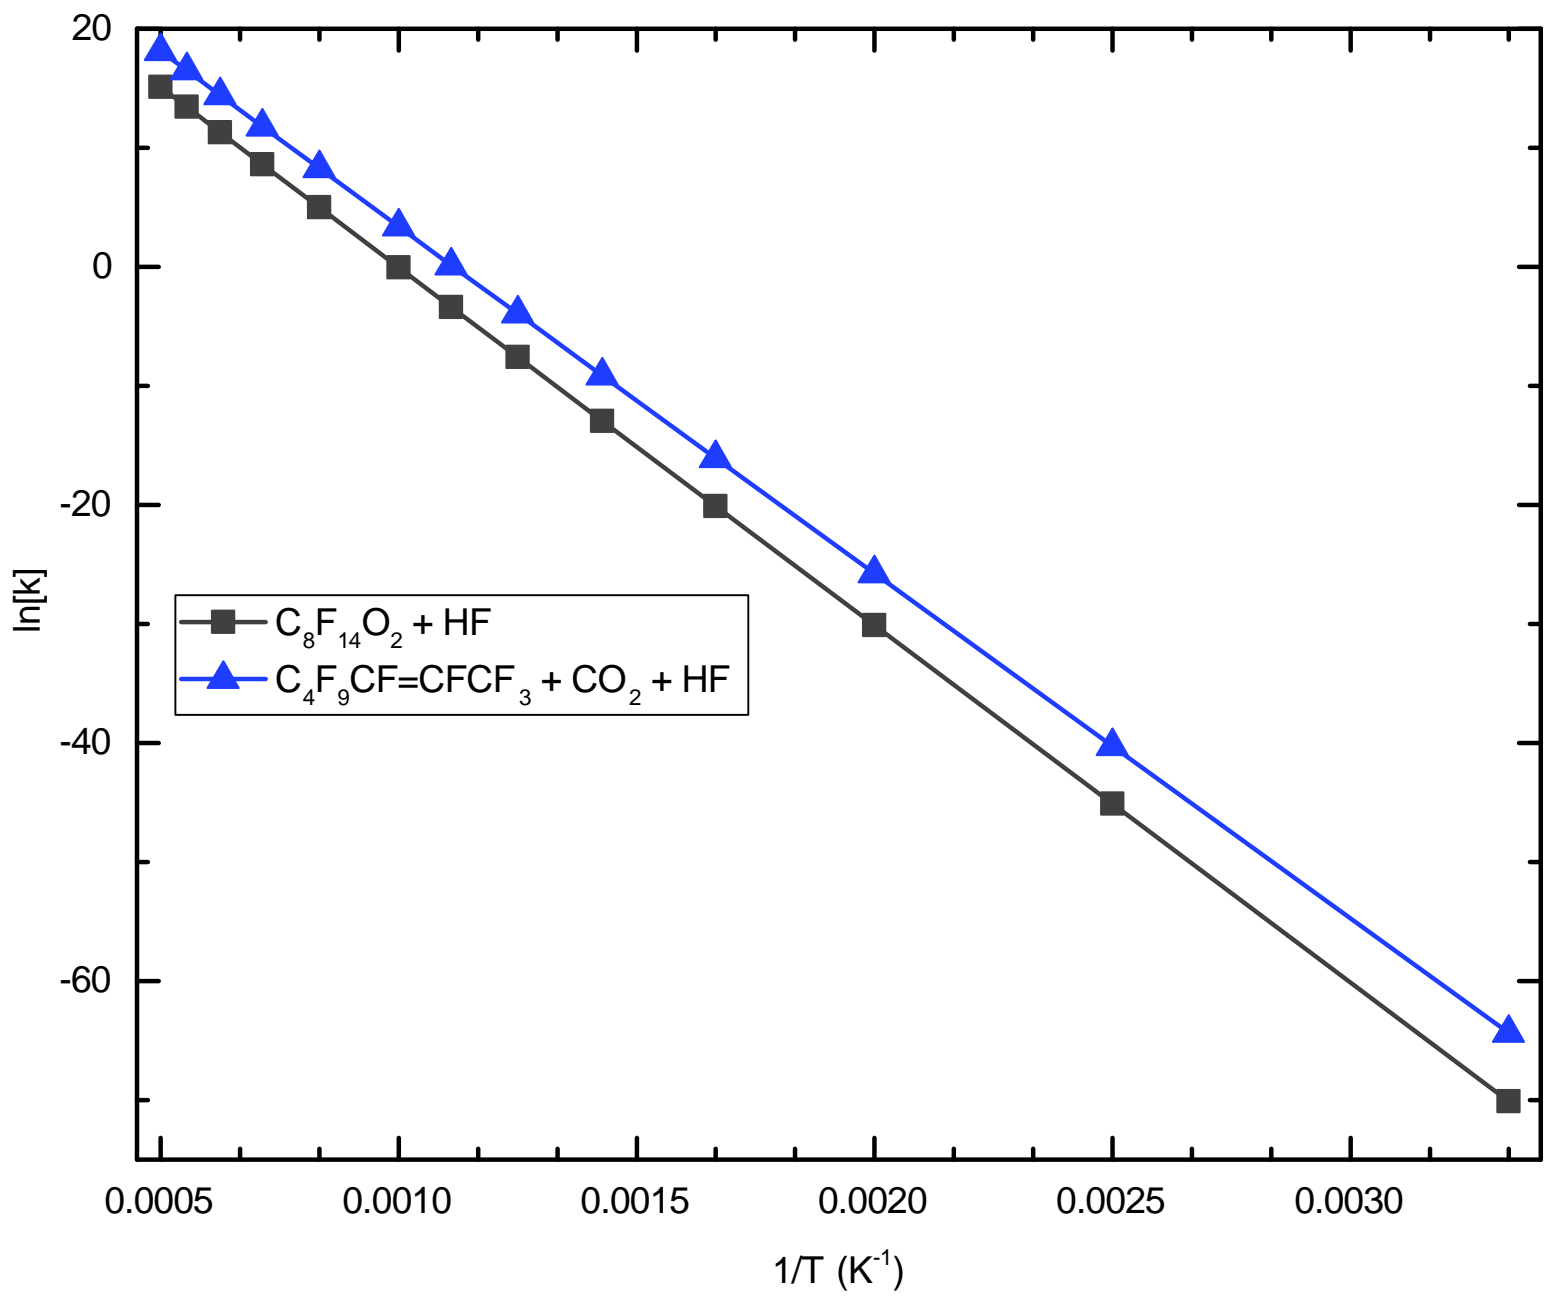

Supplement: d2em00259k2.zip [file d2em00259k2.zip]
